# Supplementary material for: Functional Analysis of Non-Genetic Resistance to Platinum in Epithelial Ovarian Cancer Reveals a Role for the MBD3-NuRD Complex in Resistance Development
Source: Cancers (Basel). 2021 Jul 28;13(15):3801. doi: 10.3390/cancers13153801 (PMC8345099; doi:10.3390/cancers13153801)
Supplement: Supplementary file 1 [file cancers-13-03801-s001.zip › SupplementaryTablesS1-S9.xlsx]

## Sheet: Supplementary Table S1
	shRNAs used in this study
	Name	Guide sequence	Short name
	Luci.1309	TTAATCAGAGACTTCAGGCGGT	shControl
	Ren.660	TTACTAACGGGATTTCACGAGG	shControl
	RPA3.1401	AAGATGTACACAAGATGGTGGC	shRPA3.1401
	MBD3.26	AACAAGGTCAAGAGCGACCCGC	shMBD3.26
	MBD3.232	TTGCTCATCAGCATCTTGCCCG	shMBD3.232
	LSD1.1825	TAAATAAAGGTTTGACTCGTGG	shLSD1.1825

## Sheet: Supplementary Table S2
	Age at first diagnosis	64.0 (35-90)
	Median years (range)
	Median Follow Up (95% CI)	35.8 (32.0-39.7) months
	FIGO stage	I	12 (3.3%)
		II	24 (6.6%)
		III	266 (72.9%)
		IV	62 (17.0%)
		Unknown	1 (0.3%)
	Nodal status	N0	127 (34.8%)
		N1	188 (51.5%)
		Unknown	50 (13.7%)
	Macroscopic cytoreduction	Complete	140 (38.4%)
		1-10mm	134 (36.7%)
		>10mm	81 (22.2%)
		Unknown	10 (2.7%)
	ECOG performance status	0	173 (47.4%)
		1	48 (13.2%)
		2	10 (2.7%)
		3	2 (0.5%)
		Unknown	132 (36.2%)
	Presence of Ascites	No	75 (20.5%)
		≤500cc	61 (16.7%)
		>500cc	186 (51.0%)
		Unknown	43 (11.8%)
	Bowel Resection	Yes	123 (33.7%)
		No	239 (65.5%)
		Unknown	3 (0.8%)
	1st line Chemotherapy	Platinum-based Chemotherapy	265 (72.6%)
		No Chemotherapy	29 (7.9%)
		Unknown	71 (19.5%)
	Median OS (95% CI)	36.3 (32.2-40.3) months
	Median PFS (95% CI)	16.3 (14.9-17.8) months

## Sheet: Supplementary Table S3
	Primers used for RT-qPCR
	Primer	Sequence
	qJAK1_fw	CCGGCTGGGCAGTGGAGAGT
	qJAK1_rev	GGTAGTGGAGCCGGAGGGACAT
	qFGF10_fw	TGCTGCTTTTTGTTGCTGTT
	qFGF10_rev	CATTTGCCTCCCATTATGCT
	qSDHA_fw	TGGGAACAAGAGGGCATCTG
	qSDHA_rev	CCACCACTGCATCAAATTCAT

## Sheet: Supplementary Table S4
	Primers used for ChIP-qPCR
	Primer	Sequence
	ChIPq_JAK1_fw	GCCGCTGCTCTAAAGAAAGT
	ChIPq_JAK1_rev	ATTCTAAGGACCACAGCGAT
	ChIPq_FGF10_fw	TCCATTTCGCACACATCTACCA
	ChIPq_FGF10_rv	AGTCTCATCTGCTCCCGTCA

## Sheet: Supplementary Table S5
	Cell line	Subtype	GI50 cPt [µM]
	EFO21	Clear Cell	2898.3
	OVKATE	High Grade Serous	996.9
	SKOV3	Endometrioid	170.8
	FUOV1	High Grade Serous	151.6
	OVCAR4	High Grade Serous	146.9
	NIHOVCAR3	High Grade Serous	126.5
	OV90	High Grade Serous	57.6
	OVISE	Clear Cell	53.7
	OV56	Serous	51.9
	CAOV4	High Grade Serous	33.7
	OAW28	High Grade Serous	21.3
	OVTOKO	Clear Cell	18.5
	TOV21G	Clear Cell	12.9
	OVCAR8	High Grade Serous	9.1
	IGROV1	Mixed Endometrioid Clear Cell	7.9
	OC314	Clear Cell	5.2
	TOV112D	Endometrioid	4.8
	OAW42	Serous	2.9

## Sheet: Supplementary Table S6
						Down in A2780cis			Up in A2780cis
	Category	Signaling Pathway	Type	ID	Description	p-value	Genes with Peaks in Geneset	Associated gene IDs	p-value	Genes with Peaks in Geneset	Associated gene IDs	Total Gene in Genset
	Cell Cycle and Proliferation		Gene Ontology Biological Process	GO:0008284	positive regulation of cell proliferation	0.0152584	29	10451, 3670, 26281, 3400, 4208, 894, 5076, 6474, 860, 1232, 80310, 1901, 3458, 5087, 5583, 6662, 7291, 64762, 1750, 3091, 3350, 3975, 5308, 6495, 10617, 11082, 60495, 64759, 729230	0.193053	11	2255, 8767, 1270, 2246, 2290, 367, 3082, 3725, 5654, 9915, 51135	829
	Cell Cycle and Proliferation		Gene Ontology Biological Process	GO:0022402	cell cycle process	0.469909	22	55137, 288, 3400, 10253, 894, 5608, 339479, 3458, 5087, 6662, 26973, 51112, 56890, 901, 1060, 5494, 5569, 6840, 8738, 10617, 63971, 164045	0.0322151	12	2255, 5890, 5962, 3624, 10213, 85444, 1070, 3082, 5218, 9150, 23607, 100130958	1310
	Cell Cycle and Proliferation		Gene Ontology Biological Process	GO:0007049	cell cycle	0.0902196	27	53918, 55137, 288, 5521, 3400, 10253, 894, 5608, 339479, 3458, 5087, 6662, 26973, 51112, 56890, 901, 1024, 1060, 5494, 5569, 5997, 6840, 8738, 10617, 54466, 63971, 164045	0.0416239	23	2770, 57531, 2255, 5890, 5774, 5962, 2290, 3624, 10213, 85444, 406, 1070, 3082, 3725, 5218, 9077, 9150, 10370, 23607, 25975, 51696, 54465, 100130958	1692
	Cell Cycle and Proliferation		Gene Ontology Biological Process	GO:2000136	regulation of cell proliferation involved in heart morphogenesis	0.0193342	3	3670, 6662, 6495	0.94287	0		16
	Cell Cycle and Proliferation		Gene Ontology Biological Process	GO:0061323	cell proliferation involved in heart morphogenesis	0.00275932	4	3670, 6662, 5308, 6495	0.943032	0		16
	Cell Cycle and Proliferation		Gene Ontology Biological Process	GO:0010464	regulation of mesenchymal cell proliferation	0.0326973	4	6474, 6662, 6495, 9678	0.946078	0		35
	Cell Cycle and Proliferation		Gene Ontology Biological Process	GO:2000114	regulation of establishment of cell polarity	0.948541	0		0.0139298	3	6093, 23189, 57698	20
	Cell Cycle and Proliferation		Gene Ontology Biological Process	GO:0043537	negative regulation of blood vessel endothelial cell migration	0.550484	1	90627	0.0389078	2	9314, 1460	25
	Polarity Adhesion Migration		Gene Ontology Biological Process	GO:0032878	regulation of establishment or maintenance of cell polarity	0.946757	0		0.0165831	3	6093, 23189, 57698	22
	Polarity Adhesion Migration		Gene Ontology Biological Process	GO:0034113	heterotypic cell-cell adhesion	0.950281	0		0.0310864	3	29119, 9314, 64065	49
	Polarity Adhesion Migration		Gene Ontology Biological Process	GO:0071677	positive regulation of mononuclear cell migration	0.000264288	3	1230, 80310, 729230	0.217542	1	6278	22
	Polarity Adhesion Migration		Gene Ontology Biological Process	GO:0034109	homotypic cell-cell adhesion	0.936466	2	288, 6814	0.00770413	5	29119, 5962, 8613, 10076, 23657	73
	Polarity Adhesion Migration		Gene Ontology Biological Process	GO:0072678	T cell migration	0.0332955	2	1901, 729230	0.345735	1	6278	41
	Polarity Adhesion Migration		Gene Ontology Biological Process	GO:0097529	myeloid leukocyte migration	0.0399015	7	10451, 1230, 9353, 80310, 3458, 727, 729230	0.448968	4	5144, 6278, 30817, 51135	166
	Polarity Adhesion Migration		Gene Ontology Biological Process	GO:0071675	regulation of mononuclear cell migration	0.00185419	4	1230, 9353, 80310, 729230	0.733421	1	6278	40
	Polarity Adhesion Migration		Gene Ontology Biological Process	GO:0014911	positive regulation of smooth muscle cell migration	0.00834137	4	50507, 80310, 10631, 80031	0.921919	1	80005	32
	Polarity Adhesion Migration		Gene Ontology Biological Process	GO:0014812	muscle cell migration	0.0279733	6	50507, 9353, 80310, 10631, 6495, 80031	0.966041	2	6093, 80005	74
	Polarity Adhesion Migration		Gene Ontology Biological Process	GO:0071674	mononuclear cell migration	0.0242061	4	1230, 9353, 80310, 729230	0.906339	1	6278	78
	Polarity Adhesion Migration		Gene Ontology Biological Process	GO:0001755	neural crest cell migration	0.00364176	5	8092, 3670, 7291, 3091, 5308	0.884518	1	10512	35
	Polarity Adhesion Migration		Gene Ontology Biological Process	GO:0014910	regulation of smooth muscle cell migration	0.0289139	5	50507, 9353, 80310, 10631, 80031	0.629041	1	80005	56
	Polarity Adhesion Migration		Gene Ontology Biological Process	GO:0036336	dendritic cell migration	0.00160317	3	1230, 1234, 729230	0.951202	0		30
	Polarity Adhesion Migration		Gene Ontology Biological Process	GO:0070374	positive regulation of ERK1 and ERK2 cascade	0.0905892	8	26281, 50507, 10253, 1230, 55801, 80310, 64762, 57105	0.0256819	8	2255, 948, 8767, 2246, 3725, 5320, 6278, 51277	181
	Polarity Adhesion Migration		Gene Ontology Biological Process	GO:0043123	positive regulation of I-kappaB kinase/NF-kappaB signaling	0.677815	4	2697, 834, 5494, 54602	0.0119586	7	1491, 948, 8767, 79971, 11214, 51135, 92140	179
	Signaling	FGF	Gene Ontology Biological Process	GO:0007249	I-kappaB kinase/NF-kappaB signaling	0.831763	5	2697, 834, 5494, 54602, 79931	0.00270358	11	1491, 10010, 948, 8767, 6093, 7088, 79971, 7114, 11214, 51135, 92140	263
	Signaling	FGF	Gene Ontology Biological Process	GO:0043122	regulation of I-kappaB kinase/NF-kappaB signaling	0.927178	5	2697, 834, 5494, 54602, 79931	0.00324172	10	1491, 10010, 948, 8767, 7088, 79971, 7114, 11214, 51135, 92140	236
	Signaling	FGF	Gene Ontology Biological Process	GO:0002224	toll-like receptor signaling pathway	0.639265	3	55366, 4064, 79931	0.0323434	5	10010, 948, 8767, 1514, 51135	128
	Signaling	FGF	Gene Ontology Biological Process	GO:0016055	Wnt signaling pathway	0.292841	11	3670, 10082, 80114, 6662, 55366, 5308, 5494, 7091, 54331, 80319, 340419	0.00334535	20	2255, 7088, 9314, 10213, 23189, 27123, 79705, 79971, 169200, 406, 1456, 1460, 4163, 4919, 5218, 8613, 10076, 23240, 25928, 65981	469
	Signaling	FGF	Gene Ontology Biological Process	GO:0198738	cell-cell signaling by wnt	0.550439	11	3670, 10082, 80114, 6662, 55366, 5308, 5494, 7091, 54331, 80319, 340419	0.00371228	20	2255, 7088, 9314, 10213, 23189, 27123, 79705, 79971, 169200, 406, 1456, 1460, 4163, 4919, 5218, 8613, 10076, 23240, 25928, 65981	470
	Signaling	FGF	Gene Ontology Biological Process	GO:0060828	regulation of canonical Wnt signaling pathway	0.648214	5	3670, 80114, 6662, 55366, 340419	0.00202523	12	2255, 10213, 27123, 79705, 79971, 169200, 406, 4163, 5218, 23240, 25928, 65981	238
	Signaling	FGF	Gene Ontology Biological Process	GO:0060070	canonical Wnt signaling pathway	0.279093	5	3670, 80114, 6662, 55366, 340419	0.000893159	15	2255, 9314, 10213, 27123, 79705, 79971, 169200, 406, 4163, 5218, 8613, 10076, 23240, 25928, 65981	289
	Signaling	FGF	Gene Ontology Biological Process	GO:0030111	regulation of Wnt signaling pathway	0.579338	7	3670, 80114, 6662, 55366, 5494, 80319, 340419	0.00254472	15	2255, 7088, 10213, 23189, 27123, 79705, 79971, 169200, 406, 4163, 5218, 8613, 23240, 25928, 65981	310
	Signaling	FGF	Gene Ontology Biological Process	GO:0030177	positive regulation of Wnt signaling pathway	0.671387	3	55366, 5494, 340419	0.007687	8	2255, 10213, 23189, 27123, 79705, 79971, 406, 65981	153
	Signaling	FGF	Gene Ontology Biological Process	GO:0090263	positive regulation of canonical Wnt signaling pathway	0.847745	2	55366, 340419	0.000622522	7	2255, 10213, 27123, 79705, 79971, 406, 65981	121
	Signaling	MAPK	Gene Ontology Biological Process	GO:0007212	dopamine receptor signaling pathway	0.899594	1	54331	0.0442306	3	1816, 2774, 84062	45
	Signaling	NF-kappaB	Gene Ontology Biological Process	GO:0023057	negative regulation of signaling	0.88798	29	80059, 6622, 3670, 431704, 10253, 161742, 2888, 860, 2070, 5996, 9353, 9607, 80114, 5998, 6662, 7291, 55366, 639, 753, 3091, 5494, 5997, 6003, 9678, 10617, 51592, 64407, 79931, 80319	0.025502	35	2770, 2255, 57689, 27253, 64111, 1491, 9306, 10010, 347731, 5774, 355, 2898, 3624, 7088, 9314, 10213, 23189, 27123, 169200, 367, 406, 868, 1816, 3082, 4163, 5654, 5791, 6529, 7114, 9542, 23240, 25928, 50484, 63976, 64798	1213
	Signaling	NF-kappaB	Gene Ontology Biological Process	GO:0010642	negative regulation of platelet-derived growth factor receptor signaling pathway	0.0169002	2	6622, 9678	0.946638	0		16
	Signaling	NF-kappaB	Gene Ontology Biological Process	GO:1905114	cell surface receptor signaling pathway involved in cell-cell signaling	0.931996	17	9378, 6622, 3670, 4208, 10082, 80114, 2893, 6662, 55366, 2915, 5308, 5494, 7091, 54331, 80319, 81832, 340419	0.00596824	24	2255, 2898, 7088, 9314, 10213, 23189, 27123, 79705, 79971, 169200, 406, 1456, 1460, 2894, 2904, 4163, 4919, 5218, 8613, 10076, 23240, 25928, 65981, 66000	573
	Signaling	Toll	Gene Ontology Biological Process	GO:0010640	regulation of platelet-derived growth factor receptor signaling pathway	0.0479585	2	6622, 9678	0.937431	0		22
	Signaling	Toll	Gene Ontology Biological Process	GO:1902042	negative regulation of extrinsic apoptotic signaling pathway via death domain receptors	0.941263	0		0.0363551	2	355, 3082	36
	Signaling	Toll	Gene Ontology Biological Process	GO:0045744	negative regulation of G-protein coupled receptor protein signaling pathway	0.0324506	3	6622, 5997, 6003	0.945017	0		37
	Signaling	WNT	Gene Ontology Biological Process	GO:0008277	regulation of G-protein coupled receptor protein signaling pathway	0.0235398	7	6622, 5996, 5998, 5997, 6003, 57561, 64407	0.769586	3	51196, 57561, 84062	127
	Signaling	WNT	Gene Ontology Biological Process	GO:2001236	regulation of extrinsic apoptotic signaling pathway	0.183145	1	2070	0.0255523	7	2255, 355, 3624, 367, 3082, 5366, 64798	154
	Signaling	WNT	Gene Ontology Biological Process	GO:0007267	cell-cell signaling	0.786275	41	9378, 65217, 6622, 3670, 26281, 4208, 57575, 2697, 79608, 1230, 1740, 9607, 10082, 55801, 80114, 781, 1234, 2893, 3458, 4857, 6662, 50616, 55366, 185, 1946, 2915, 3091, 3350, 3975, 5308, 5370, 5494, 6507, 6814, 7091, 53358, 54331, 80319, 81832, 114088, 340419	0.022453	47	2770, 2255, 27253, 64111, 1740, 2898, 3624, 6854, 7088, 9314, 10213, 11245, 23189, 27123, 79705, 79971, 169200, 367, 406, 777, 785, 1456, 1460, 1816, 2558, 2894, 2904, 3082, 3355, 3781, 4163, 4919, 5218, 5376, 6505, 6529, 6853, 8613, 10076, 23240, 25928, 54510, 57616, 65981, 66000, 84062, 440279	1544
	Signaling	WNT	Gene Ontology Biological Process	GO:0070098	chemokine-mediated signaling pathway	1.84958e-06	7	1230, 1232, 2829, 9353, 1234, 3091, 729230	0.944002	0		81
	Signaling	WNT	Gene Ontology Biological Process	GO:0071875	adrenergic receptor signaling pathway	0.364656	2	5997, 57561	0.027644	3	5144, 11214, 57561	21
	Signaling	WNT	Gene Ontology Biological Process	GO:0032924	activin receptor signaling pathway	0.931698	0		0.00260785	4	2255, 3624, 1460, 10370	39
	Signaling	WNT	KEGG Pathways	hsa04110	Cell cycle	0.0902196	1	894	0.0416239	0		124
	Signaling	WNT	KEGG Pathways	hsa04620	Toll-like receptor signaling pathway	0.639265	1	5608	0.0323434	2	3725, 51135	102
	Signaling		KEGG Pathways	hsa04310	Wnt signaling pathway	0.292841	2	894, 80319	0.00334535	4	6093, 27123, 1460, 3725	150
	Signaling		KEGG Pathways	hsa04115	p53 signaling pathway	0.459314	2	894, 901	0.000544138	5	355, 5366, 50484, 54205, 64065	68
	Signaling		KEGG Pathways	hsa04062	Chemokine signaling pathway	0.0177567	8	10451, 1230, 1232, 2829, 1234, 53358, 54331, 729230	0.504983	2	2770, 6093	188
	Signaling		KEGG Pathways	hsa04621	NOD-like receptor signaling pathway	0.0323675	3	834, 838, 59082	0.817032	1	8767	58
	Signaling		Reactome	R-HSA-1640170	Cell Cycle	0.0902196	4	894, 7444, 1060, 5983	0.0416239	2	10213, 1460	626
	Signaling		Reactome	R-HSA-5654219	Phospholipase C-mediated cascade: FGFR1	0.270562	1	26281	0.00730954	2	2255, 2246	16
	Signaling		Reactome	R-HSA-5654688	SHC-mediated cascade:FGFR1	0.354688	1	26281	0.0146516	2	2255, 2246	21
	Signaling		Reactome	R-HSA-5654693	FRS-mediated FGFR1 signaling	0.41151	1	26281	0.0216399	2	2255, 2246	23
	Signaling		Reactome	R-HSA-5654221	Phospholipase C-mediated cascade; FGFR2	0.479228	1	26281	0.0279604	2	2255, 2246	18
	Signaling		Reactome	R-HSA-5654699	SHC-mediated cascade:FGFR2	0.559731	1	26281	0.0434738	2	2255, 2246	23
	Signaling		Reactome	R-HSA-5654689	PI-3K cascade:FGFR1	0.590136	1	26281	0.0450926	2	2255, 2246	21
	Signaling		Reactome	R-HSA-190241	FGFR2 ligand binding and activation	0.485847	1	26281	0.0294957	2	2255, 2246	20
	Signaling		Reactome	R-HSA-2033519	Activated point mutants of FGFR2	0.473269	1	26281	0.0267346	2	2255, 2246	17
	Signaling		Reactome	R-HSA-190242	FGFR1 ligand binding and activation	0.321096	1	26281	0.0108356	2	2255, 2246	16
	Signaling		Reactome	R-HSA-1839126	FGFR2 mutant receptor activation	0.526023	1	26281	0.0388502	2	2255, 2246	33
	Signaling		Reactome	R-HSA-168898	Toll-Like Receptors Cascades	0.99331	3	4208, 5608, 4064	0.0337533	6	10010, 948, 8767, 1514, 3725, 51135	155
	Signaling		Reactome	R-HSA-975110	TRAF6 mediated IRF7 activation in TLR7/8 or 9 signaling	0.968662	0		0.00501983	1	51135	16
	Signaling		Reactome	R-HSA-6783589	Interleukin-6 family signaling	0.951775	0		0.00797173	2	3716, 1270	27
	Signaling		Reactome	R-HSA-5602358	Diseases associated with the TLR signaling cascade	0.951464	0		0.00961417	2	948, 51135	24
	Signaling		Reactome	R-HSA-1266695	Interleukin-7 signaling	0.954728	0		0.0158952	2	3716, 3082	27
	Signaling		Reactome	R-HSA-6783783	Interleukin-10 signaling	0.000315327	3	1230, 1234, 729230	0.330149	1	3716	48
	Signaling		Reactome	R-HSA-168638	NOD1/2 Signaling Pathway	0.00579033	3	5608, 834, 837	0.526556	1	8767	36
	Signaling		Reactome	R-HSA-1980143	Signaling by NOTCH1	0.044427	5	9734, 55534, 1024, 3091, 7091	0.579703	1	7088	73
	Signaling		Reactome	R-HSA-168643	Nucleotide-binding domain, leucine rich repeat containing receptor (NLR) signaling pathways	0.0318665	3	5608, 834, 837	0.79981	1	8767	52
	Signaling		Reactome	R-HSA-388396	GPCR downstream signaling	0.00965037	26	10451, 431704, 1230, 1232, 2829, 5996, 50940, 1234, 1901, 5583, 5998, 185, 187, 727, 2915, 3350, 4922, 5732, 5997, 6003, 54331, 57105, 64407, 283189, 390181, 729230	0.977945	14	2770, 3716, 346562, 6093, 1607, 4829, 11245, 1816, 2774, 3355, 5138, 5144, 11214, 221391	954

## Sheet: Supplementary Table S7
	Prognostic Factor	Progression-free Survival		Overall Survival
		HR (95% CI)	P value	HR (95% CI)	P value
	JAK1 expression	1.43	0.008	1.6	0.001
	(IRS≥1 vs IRS=0)	(1.01-1.85)		(1.21-2.10)
	Age at first diagnosis	1	0.576	1.02	0.001
	(years)	(0.99-1.02)		(1.01-1.03)
	FIGO stage	2.01	0.008	1.78	0.037
	(III/IV vs I/II)	(1.20-3.37)		(1.04-3.05)
	Postoperative residual tumor	1.56	0.002	1.58	0.002
	(yes vs no)	(1.18-2.06)		(1.18-2.12)
	Presence of ascites	1.26	0.179	1.39	1.392
	(yes vs no)	(0.90-1.77)		(0.98-1.97)
	Prognostic Factor	Progression-free Survival		Overall Survival
		HR (95% CI)	P value	HR (95% CI)	P value
	FGF10 expression	1.3	0.204	1.26	0.259
	(IRS≥1 vs IRS=0)	(0.87-1.93)		(0.84-1.89)
	Age at first diagnosis	1	0.416	1.02	0.001
	(years)	(0.99-1.02)		(1.01-1.03)
	FIGO stage	2.03	0.007	1.82	0.03
	(III/IV vs I/II)	(1.21-3.40)		(1.06-3.13)
	Postoperative residual tumor	1.52	0.003	1.5	0.007
	(yes vs no)	(1.15-2.01)		(1.12-2.01)
	Presence of ascites	1.19	0.307	1.34	1.338
	(yes vs no)	(0.85-1.67)		(0.94-1.90)

## Sheet: Supplementary Table S8
	Normalized reads chromatin focused RNAi screen
	Gene	guide	Pool1	Pool2	Pool3	A2780_rep1	A2780_rep2	A2780_rep3	A2780_cPt_1	A2780_cPt_2	A2780_cPt_3
	HIST1H4E	TTAAGCGGTAGCATTAGCCGCC	128	139	185	230	137	391	150	627	219
	HDAC5	TTGCTGTCTAGCTTCTGCCGGT	125	154	174	623	700	403	647	113	165
	HIST4H4	TTTTGGAGTCTGTAGAGAAGCT	135	147	171	206	191	200	300	520	212
	RPS6KA4	TTGAATGCCATGAAGGTGGCGT	135	161	157	102	134	831	166	318	1118
	SIN3B	TGTGACTTTTCCAAGACACGGC	142	128	183	102	70	163	255	208	212
	EHMT2	TTGCTATAGACACAGCCACCAC	125	158	171	582	411	578	702	696	527
	H2AFY	TAAAGCACCACAACACACGCTT	135	161	160	251	325	263	609	81	104
	HLCS	TTGGTCTGCAGATTTTGGCGAT	152	176	128	183	350	97	138	541	26
	ATXN7L3	TCTTGTTGGAACCTAGGCCGGA	155	136	165	1011	684	469	514	226	481
	METTL7B	TTTGAGAACAAAACCTCTGCCT	118	202	137	191	494	228	275	535	373
	TRAF7	TTGATTGTCTGGTAGGAGCCGC	135	165	157	27	748	687	491	431	1086
	CBX6	TTGATTGTGACCGTCAGGAGGT	115	169	174	258	195	110	259	645	248
	HIST3H3	TTAGGCATGATGGTGACCCGTT	138	143	177	509	287	306	396	1	581
	NCOR2	TTTGGTGATGCTTCCGCCCGGA	182	114	163	21	131	178	208	779	653
	CBX6	TTCAGGTTCAGGATGATGCGGT	148	169	143	133	319	291	13	277	341
	NUF2	TAACTGTTGCATTTTGTCCGCA	138	121	202	391	306	222	284	298	122
	HIST2H4A	TCTCTCAAGACCTTGCGGTGGC	158	150	154	209	214	216	494	232	155
	DPF3	TATGTATACAGCTGGCCCGGGG	88	158	217	636	411	284	141	669	516
	SAP130	TTGTGACATCTCGTGACTGGGC	135	172	157	92	83	225	99	1	194
	DMTF1	TAAACTGCAAACAAAGGCCGGT	155	121	188	175	277	1	4	18	36
	ALKBH3	TTGAAGTGGCTTCTCAGTGGAA	185	128	151	256	280	313	150	333	423
	RPP25	TAAGTACGCTGAGACTAGCGGC	121	139	205	19	90	313	55	378	255
	FIZ1	TAAAGAATTGCGTGGACCGGTC	165	143	157	370	459	297	192	9	241
	HIST1H4B	TAAATCAAACCGGAAATTCGCT	145	147	174	29	61	522	118	99	126
	HIST1H4C	TAAGACCGGAAATGCGCTTGAC	172	143	151	454	948	481	555	161	674
	ZBTB12	TCTCCAAGGAATCATCTTCCCT	135	132	200	214	640	200	880	630	144
	ADAR	TTACAGGTGAGGAACTCTGCGT	135	169	163	290	490	216	523	6	65
	REC8	TCTGAGAGCAAGAAGGCTGGAA	118	176	174	462	532	740	542	485	499
	SETD1B	TCCATCTTCTCTGAGGTCGGGG	125	172	171	240	115	603	424	702	678
	JMJD6	TACTCCTTCACATACGGCGGGC	148	143	177	566	411	481	517	743	244
	H2AFX	TTACCAAGTGCTTCGTCCCGGC	148	143	177	204	207	531	173	3	108
	DHX30	TCGGTAACATCTATGGTCCCTT	148	183	137	485	344	88	189	39	223
	C17orf49	TACCTTGCGTTTCACAGTGGCC	152	154	163	337	579	687	201	274	581
	JMJD6	TAATAGCTTCGTCTTGCTGGTT	135	150	185	50	265	372	632	206	162
	DDX56	TAAGTGGAACTGCTCCGTGGGA	148	128	194	131	446	275	443	622	291
	KAT8	TTGCGAGTGATCTTGCGCTCAG	128	180	163	743	255	281	577	443	137
	H2AFJ	TCTTCTTGTTGTCACGCGCGGC	135	139	197	305	490	169	364	238	233
	DHX9	TCTACAAGCACAATCTGCCCAT	148	158	165	243	338	506	182	12	387
	JMJD7-PLA2G4B	TACAGGGAAGTCATTGCCCGGA	155	128	188	477	115	381	106	476	312
	ZRANB3	TTGACCTACTTAGACCTCGCTT	121	183	168	472	640	181	322	758	169
	HDGFRP2	TTCACTTTCTGCACCGCCTCGA	115	198	160	152	175	153	90	176	72
	ATR	TCCACTAACACAACTAGCCCGG	135	161	177	412	86	263	224	375	183
	HIST1H3J	TCGACTTCTGATAACGGCGGAT	168	114	191	436	271	590	632	173	398
	SRCAP	TTGACCTTCATCTTGACTGGCT	168	128	177	128	140	172	67	307	301
	PADI3	TTTCTGCACACATTGGTGCCAC	168	154	151	136	532	269	364	226	147
	TNRC18	TTCTCTTCCATCTCCGCCCGGT	118	205	151	384	150	128	392	137	51
	PHC1	TTACTGGACAGGAACACAGGGT	135	128	211	641	150	369	396	182	524
	MEN1	TTTTGTGTCCCAGACTCGGGAT	142	172	160	496	538	378	676	9	309
	DPF1	TCGATCTTGTACTCGCAGGGCC	158	165	151	86	70	459	93	797	86
	DCTD	TCACTGAAGCTTTTGACTCGGT	135	132	208	399	1171	341	628	520	76
	PPP4C	TCTACCAAGATCTCTCTGGCCT	115	150	211	175	242	57	71	312	18
	RFX5	TTTCTGGACTCTCAGAACCCTT	118	161	197	397	420	231	635	66	4
	LNX1	TATTCCAAGCTGCTCCTCGGGG	145	154	177	290	175	225	609	247	194
	C16orf53	TTGGTCACTAAATTCTACGCCT	155	161	160	42	185	528	252	247	133
	SMARCA4	TACAGTGACTCCAAACTGCGGC	148	132	197	63	334	13	74	479	15
	KDM4B	TTGAACCCGTGATTGAAGCCGG	125	165	188	89	1305	556	74	256	72
	HIST1H3B	TGGGCATAATAGTCACTCGCTT	155	132	191	167	131	175	463	657	119
	TNKS2	TTAGCATGCACATCAGCTCCAT	182	128	168	196	223	294	440	146	312
	HIST1H2BK	TTGAAGGCGAACTACGAGCCTG	125	169	185	459	500	107	549	443	319
	STRA13	TCATCCTTGAAGTGCAGGTGCA	132	136	211	399	315	359	128	806	423
	DDX56	TTGAGTGCTTGTACGTCCTCGT	132	150	197	277	204	119	240	176	341
	HDGFL1	TAACTTGGCAAACACCAGGTCC	135	147	197	165	118	656	1	18	115
	ING1	TTGCACAGACAGTACGTGGGTT	148	143	188	180	150	1	204	21	233
	PRMT1	TTGGATGTCATGTCCTCAGCGT	132	183	165	225	121	153	16	21	97
	RPS6KA3	TTGCTGTCCATTCTCAGCGCTG	118	180	183	532	408	412	753	568	534
	HR	TCAAACTTGACCCAGACCTGGT	138	143	200	415	121	128	58	315	241
	DPF3	TGCAATCGTCTCTTCTTGCGCC	138	158	185	206	80	197	99	1	86
	PADI3	TATGTGACAGCTCACGCTGGGT	138	169	174	266	338	128	383	589	72
	MPL	TTGAGGTGCACTTTGCCTGGGC	142	165	174	569	293	122	147	161	122
	ATF2	TCACTGGTAGTAGACTCTGGGT	158	143	180	240	516	4	4	42	287
	TRAF7	TAGAGAGGCATCTACGGTCCTT	172	132	177	488	160	194	332	1	208
	DAXX	TGTCTTGCAAGTACCAGGCCGA	105	183	194	227	115	47	144	1	101
	ENY2	TTAGACCCTCAGTAGCTCGGGC	108	183	191	113	258	235	377	1	158
	SETD1A	TAGCTGTTCTCTGACCGCCGGG	115	176	191	321	153	728	71	1	90
	NAA15	TTGAATATCTCGATCCGCCGCC	121	176	185	308	45	334	392	99	269
	MUM1	TTGTGGTGGATTCTGGACCCAC	138	139	205	193	150	550	558	333	112
	TDRKH	TTATCCAATTGCAGGCTGCGGG	165	169	148	733	331	640	268	12	398
	USP35	TTAACCAGGACACTTGGGTGTA	175	107	200	902	640	759	342	1338	524
	KAT8	TTCACTGTCTTGGTCAGCGCCA	128	172	183	881	328	25	504	1	33
	PADI4	TTTGAGCTTGAAGAGCTGCGGG	138	143	202	258	328	256	153	627	158
	PHC1	TAACTGAGAACAACCCACCGGG	148	150	185	456	363	225	549	9	119
	PHF19	TAACATTGCAGCATCCGCAGGT	155	143	185	245	376	206	125	48	258
	NFYC	TTTCTGCTGGAGAATCTCGGCC	98	209	177	245	341	540	963	455	69
	CBX8	TGCTTTATCACCCTGGCCGGGA	118	169	197	264	389	400	236	6	180
	IGHMBP2	TCTATGAGTGAGGAGGCTGGGC	125	176	183	183	125	128	134	922	194
	SCMH1	TTTCTTCGACAGCAGTTCTGGC	132	158	194	86	156	160	58	957	61
	APOBEC2	TACCAGGTGACATTGTACCGCA	132	198	154	456	430	409	450	497	294
	YBX2	TTTTACTGGAGGCTCAGGTGGC	168	125	191	589	242	341	635	999	226
	ERG	TTGGTAATCGTGTCCTGCCGAC	128	183	174	446	328	840	727	241	90
	CDK2AP1	TCTAGCGTGAATGATGCCGCGC	142	183	160	206	261	150	1	1	72
	HIST1H2AA	TTGCTTTGGGCTTTATGGTGGT	145	172	168	397	354	263	673	1	362
	SIK1	TCAGACAACTGTCAGAGCTGGT	162	143	180	316	166	32	118	128	22
	RERE	TGAAGTACAGGTCTGTCCGGGC	165	132	188	238	125	219	106	307	11
	FBXO44	TGCTGAAACCAGATGTAGCGGA	111	187	188	50	366	612	160	3	323
	MEAF6	TGAACTTCTGGCTTCAAGCGAT	148	136	202	277	191	406	138	256	97
	C17orf96	TAACACCAAAGTTTCGACCGGC	135	147	205	344	369	69	163	1	112
	LMNA	TTGATGTCCAGAAGCTCCTGGT	145	165	177	154	503	191	1	137	86
	MLLT10	TTCCTGCAAAACCACGGTCCAG	152	172	163	378	401	253	517	678	208
	CDYL2	TTGACAAACTCCTTGGCCGGGG	148	132	208	170	529	197	150	116	212
	PHF23	TGTCTGTACAAACAGCGGCCGA	152	136	200	102	195	334	211	143	445
	PARP14	TAGAAGAACACCAGGAAGCGGG	162	172	154	63	274	634	90	12	366
	PAXIP1	TTGCTGTGAAAACTGATGCGGA	132	209	148	647	398	359	138	523	18
	PIAS3	TTTGCTTCCAGGTAGGGCCGGG	162	147	180	548	249	281	83	942	384
	HIST1H2BO	TAGAGTAACTCTCTTTGCGGCT	175	143	171	123	249	72	399	1	8
	PHF3	TTTCTTCGGAGCATCTGTGGTC	199	147	143	360	109	222	326	283	237
	CARM1	TTGTCCTTGAAGTCGGTGTGGT	118	161	211	191	185	238	134	336	187
	YBX2	TTACATTAGTGGCTTCTGCGCC	148	154	188	42	70	144	51	24	79
	CHD8	TTGCTTTGTCATCTGGTCGGCC	158	158	174	227	296	369	271	1376	377
	RASD2	TTCAGACACAGAGTCCACTGGC	165	194	131	389	134	1	297	987	101
	H2AFB3	TCACTGAAAACGAAAGCTCCGC	158	136	197	303	522	163	434	333	223
	CARM1	TAGTGCATGGTGTTGGTCGGGA	162	172	157	389	354	191	287	479	212
	CDK9	TAACGGACCAAACTGTGCCCAG	145	125	222	217	268	428	345	72	112
	NSMCE2	TTGAACTGGAACGTCCTGGCAT	145	147	200	285	226	593	619	321	413
	CHMP3	TACTGGGTGCTTTGCCCAAGGC	152	183	157	167	166	384	141	348	90
	SMARCE1	TCGTCTTTCTTCTCCTCGCCTT	162	136	194	279	293	235	367	304	241
	MACROD1	TTGCCAGTCTTACAGCTCTGCA	95	198	200	183	767	116	654	345	258
	SOX15	TTTGCTTCCAACCTGTTCGGCA	155	147	191	501	859	313	469	574	194
	KANSL1	TAACCTGTGAGCTAGAGCTGGC	165	165	163	313	296	684	160	639	212
	PHF8	TCACACTCGATCATGAAGCGGG	125	147	222	266	287	231	310	862	724
	WBSCR22	TAGTCTACCACCATGCCACCGG	128	183	183	433	328	309	364	1	341
	HIST1H2AG	TGGACTCGATTTTACTTGAGCT	142	147	205	269	258	206	316	464	144
	PARP3	TTGAGAAGCTGGTAGTCTCGGT	145	169	180	16	169	125	55	366	40
	HMG20B	TTCATCTTCCGCAAGCGCCGAA	155	154	185	264	328	75	255	6	33
	HMGA2	TCTGCTTTCTTTTGAGCTGCTT	158	176	160	1436	258	447	434	330	219
	KDM5B	TAATGCTCCACACACTGTCGGC	168	107	219	412	494	565	281	354	11
	UBA1	TAACTTCGTGACATCCCAGGGC	121	183	191	157	331	175	259	42	230
	EHMT2	TATAGACACAGCCACCACGCTG	125	165	205	342	544	191	204	651	617
	FOXA3	TTGAAAGACAGCGAGTGGCGAA	132	172	191	566	535	238	80	461	352
	KDM5D	TAGAGGTCCAAGATCTTCCGCT	135	183	177	157	198	138	99	1	266
	PRDM14	TAACAGAGAAGCATCCGCAGGG	162	176	157	97	618	394	718	333	205
	USF2	TTGTCTGCGTTACAGTCTGGAA	168	147	180	113	350	250	36	161	387
	WIZ	TTCATCTGCTCACTGGAGCCGC	101	187	208	128	99	241	236	333	140
	ASF1A	TGCTCTGATAAGTAGCAGCGTT	121	161	214	303	210	375	370	232	180
	METTL10	TAAGACAACTTAACATAGCGCT	135	187	174	120	230	29	189	1	158
	USF2	TGAGACCACTAGAAGTGCCGGG	142	143	211	258	452	213	711	250	230
	RFXAP	TGTTTCTTGCACATCCACGGTT	145	154	197	175	290	300	106	770	330
	YY1	TTGAAGTCCAGTGAAAAGCGTT	148	154	194	159	163	197	501	324	280
	TNKS	TACTCTACAACAGACACGCGGT	165	154	177	144	802	153	7	9	248
	HIST1H2AE	TAGTGGCTTCCTAACAGCAGAA	293	117	86	162	147	197	166	110	190
	ATOH1	TAGATTTGGGCCATCTGCAGGG	162	150	185	175	179	269	670	167	334
	EP300	TTGTGCACAACTGTTTGCCGTA	165	147	185	42	462	141	297	21	370
	HIST1H2AE	TCTTATTGTCGCGAGCCGCGTT	115	161	222	141	334	91	64	113	291
	MAZ	TGACATGGCACTTTCTCCTCGT	128	165	205	29	70	19	179	223	151
	PNMT	TTGACATCATCTACGCCTGTCT	128	224	146	342	137	10	861	164	176
	FBXO17	TTGAAGATGAGATTGCGGCCGA	175	158	165	292	93	41	134	3	4
	GTF3C5	TAAGACACAAACCTCCCTCGAC	202	139	157	84	637	250	1	690	180
	HIST1H2AM	TTGCCCTTAGCTTTGTGGTGGC	128	154	217	600	459	319	112	128	287
	HIST3H2BB	TGTACTTGGTGACAGCCTTGGT	145	143	211	94	169	503	109	565	703
	SIRT6	TCTTCCACAAACATGTTCCCGT	145	169	185	214	70	210	26	81	273
	HIST1H4E	TCCAGAAACACCTTCAGAACCC	148	154	197	175	443	509	469	78	348
	SETD8	TGTCTGACAAACACAAGGCCTC	175	147	177	537	430	671	472	669	380
	CSNK2B	TAGAGCTTCACCATGGCTTCAC	222	117	160	282	191	288	702	1	327
	H2AFX	TTCCAGTTCAGAAGCCAACGGA	101	202	197	386	214	412	555	369	172
	RNF40	TTCTGCTCAAACTCGATGCGCA	138	194	168	264	560	197	93	708	258
	PHF23	TTTCACTGTCAGCAGGAGGGAC	152	180	168	152	703	378	278	143	205
	PPP4C	TTGTCCGAATCTGATCCAGGGT	192	117	191	743	481	160	769	84	76
	BRD3	TTCGGTACGAATCTCACACGGT	98	249	154	428	230	503	950	286	172
	TTF2	TTGTAAGGTAGACACGCCGGGC	142	154	205	235	398	453	125	1	115
	C6orf130	TTTTAAGGTAGGTTTGCCCGGT	115	187	200	496	255	203	466	214	129
	BRWD1	TTGGACAAGACCAACTCCTCGT	128	169	205	172	230	150	306	60	97
	ELP4	TAGAAGAACTGTTCCAACGGCT	145	169	188	167	166	110	549	194	33
	TAF9B	TAATCGTGGAACTAGTCTCCCT	152	165	185	71	175	116	7	69	373
	ACTL6A	TACACTGCCATAGAGACCTGGT	162	169	171	149	156	281	211	500	18
	CDC34	TTCCTGTACATCACGGAGGCGT	108	176	219	488	191	263	746	18	51
	HIST1H4I	TCAAAATGCCATTTAGCCGCCG	121	154	228	402	408	650	450	752	362
	GPS2	TCACTTGTGGTAGAATCGCGGG	125	198	180	136	226	494	20	1005	395
	HIST1H4G	TTTGAGCACGTAGACCACGGCC	132	180	191	136	169	403	39	1	255
	HIST2H2BF	TACACGTAAACGGAGTAGCTCT	138	165	200	45	188	253	227	1	327
	H2BFWT	TTTGACAGAAAGACTGGCGCTT	142	161	200	172	220	269	1	99	83
	USP3	TAAGCCAACAGCATCACCTGTC	185	121	197	118	662	525	383	734	638
	ERCC6	TTTTGTGGGTATAGGAACCGGT	121	183	200	245	389	216	268	532	226
	DHX34	TTGCGAGAGTTTCTGCTCCGTT	125	194	185	235	245	372	4	253	205
	PPP4C	TGTCCGAATCTGATCCAGGGTC	138	169	197	206	105	743	568	6	724
	KAT8	TTGATCTCATCATGCTTGCGCT	148	176	180	308	258	256	303	1	108
	RFX5	TCAACTACACTCTTCTTCCGCT	145	158	202	123	513	213	300	87	76
	ZFP57	TTTGAGCTCAGACTGGTCCCGG	142	187	177	162	478	344	259	357	108
	SNAPC4	TATCGATGTGGAACAGCTGGGT	148	147	211	331	150	10	243	550	287
	SAE1	TGAAACACAAACAGCTGTGGTT	155	132	219	102	214	219	482	411	226
	INO80B	TTCTTGTGCTCTTCTGCCCGCC	175	191	140	172	223	325	157	152	158
	HIST1H2BH	TTTGGGTTTGAACATGCGTCCA	115	187	205	430	408	331	278	529	208
	TAF6L	TGTCCATCTGCTTTGACCTGGG	142	180	185	686	341	509	698	262	513
	RING1	TCTGAATGCAGTGACCGAGGGG	148	202	157	308	532	547	520	99	846
	TAF5L	TGCCATCTGAATCTGCTCGGTA	152	161	194	214	252	656	166	310	205
	HDAC10	TTGTTGAACACACAGAACCCGT	165	154	188	170	163	412	61	604	72
	RAD54L	TAAACAGCTCCTTCAACTCGCC	128	161	219	81	271	10	294	116	40
	SIN3B	TGGATGGTGAACATCTCGCGTA	148	172	188	467	83	178	144	223	172
	H3F3C	TTTACGAGCAGTCTGCTTGGTT	132	183	194	628	153	157	501	33	377
	HIST1H2BG	TTTATGTGAGACTTGAGTGGCT	148	187	174	183	341	97	224	797	79
	FLYWCH1	TAAATCTGCTGGCTTTCAGGAG	172	172	165	73	140	88	96	128	230
	PRKCD	TAGTTGTGAACCTTGAAGCGGT	179	147	183	287	328	387	392	229	112
	RFWD2	TAACACAGCACACATTAGCCTT	182	125	202	628	236	247	90	342	262
	CBL	TAGTCTGTCTGTCAACAGCCGG	185	139	185	384	265	659	147	523	316
	HIST1H3I	TTTGCTTTGTTCGTGCCATGGC	125	220	165	514	341	572	1183	110	413
	HDGFL1	TCCCGAAGAAAAACACCTGGTA	138	158	214	285	198	412	87	286	280
	CBX8	TCCAGGATGTTTTCCTCCGGTT	155	161	194	425	544	369	144	425	258
	MTA1	TAGAAGAAGAAATCCTCCCGCT	192	161	157	475	398	281	784	452	427
	ATXN7L3	TTTTCCGTGACTCAGAGCTGTT	168	180	163	412	309	278	329	1	169
	PHF6	TTTCATTCGAGGAGAGACGGGC	111	187	214	105	230	1	7	434	137
	PRDM15	TCTTTGACCATGACCACTGGGC	128	187	197	170	217	331	220	232	90
	GON4L	TGACTGACCATCAACACTGGAT	138	143	231	191	290	497	71	280	194
	RPP25	TTGGAAGCAAGACTCCAGCCAG	142	165	205	277	67	338	112	981	122
	SLK	TTGCTTCTAACTGAGCATCGGT	145	202	165	965	350	344	788	720	531
	FKBP5	TTTGTCTCCAATCATCGGCGTT	115	176	222	300	284	434	373	378	126
	DPF1	TCATGCAGTATCCACCGTGGGC	135	187	191	19	74	241	342	6	660
	BAZ2A	TTGTGAAGTGCCTTCTCCCGGA	152	161	200	326	220	103	23	333	215
	RUVBL2	TTCATGTACTGCGTGGAGCGGG	152	165	197	6	93	128	214	1	230
	CHMP7	TTGTTGTGTGGCTTGTTCTGGA	172	165	177	157	166	178	32	503	104
	PNMT	TGATGTCCTCAAAGTGGCTGCA	108	176	231	516	137	235	291	366	11
	CXXC1	TTGATTCCGTACATTGCCCGTT	135	180	200	446	557	740	389	764	402
	VRK1	TTCAACACCAGGTTCCTTGCTT	142	176	197	159	109	138	380	15	258
	DNMT1	TTGAACTTGGAGTAGGTGCGCG	148	165	202	391	255	381	306	1	348
	METTL12	TTGCCCACAGAAATACTAGGGT	162	165	188	227	287	278	408	363	176
	KDM6B	TCGCTGATTTTGACCGTGCGAG	128	205	183	436	299	684	475	393	473
	DNMT3L	TAAGATCTCTGCCTGTCCCGGG	162	154	200	360	379	309	530	304	187
	PRKCD	TTATGGTGCACATTCATGCCGC	165	183	168	235	360	29	380	1	180
	WIZ	TTGAGGTTTTGGCTTGCTCCTT	165	161	191	350	354	403	217	140	438
	USP13	TTCTTGTAGACCCTGTCGCCGG	168	161	188	212	439	313	788	518	362
	FOXP1	TACAACACTGATGTTGACGGTT	132	158	228	240	160	206	99	54	495
	ZNF740	TAACCCTCCAATGTCAAGCCAT	142	154	222	412	427	731	1294	1	459
	MSH6	TTTCGAGCAACTTTGACAGGGC	162	165	191	204	322	406	249	15	402
	INO80E	TTCTGGTTGTGTCAGTGGCCGG	168	176	174	258	363	431	437	176	144
	CHAF1B	TAGGATGACAGCATCATCTCCT	229	132	157	571	166	412	252	104	434
	KAT2A	TAGAAGAACTTCTCCAGGGCGC	148	180	191	730	494	621	479	1	445
	PRDM13	TTGTAGACTGTAAAGGCCGGCA	148	183	188	100	633	525	166	81	438
	HIST1H1E	TCGGACATGTTGAAGGCAAGCG	152	150	217	303	315	272	201	21	341
	PCMT1	TCTTGTAGCTTGTCATACTGCT	175	150	194	79	166	206	316	1	176
	KDM2B	TTGTACAGCTTGTCCCGCTGGG	128	147	245	172	299	185	147	39	466
	SRCAP	TCTACCACAGTTACCAGCCGTC	168	172	180	496	7	103	236	1	54
	KAT5	TGGACGTAGAAAAGCTTCCGGC	172	154	194	14	487	197	271	491	61
	HIST2H2AA3	TCTTCTTGTTGTCCCGAGCCGC	121	169	231	496	379	416	112	167	29
	TADA2B	TCATAGTTGACAGAGAGCCCGC	125	165	231	131	23	210	131	1	319
	TSSK6	TATTGCAGGTTCCAACCGGGAA	125	202	194	733	242	88	348	310	208
	HMGA1	TTTTGCTTCCCTTTGGTCGGCC	132	172	217	855	274	185	424	485	405
	KAT5	TCTCACTGTACACAGCTGCCTG	138	132	251	131	331	1121	424	390	380
	ACTR5	TTTGCCGTGAATACAGTGGGTT	145	205	171	389	268	453	112	113	284
	SAP25	TATTGTCAACACAACCAGCCCA	175	161	185	180	226	203	275	6	33
	TFPT	TTGCTTTCTTGTCTAACGCCGC	168	143	211	717	452	163	1135	327	330
	HIST1H2BH	TTGGGTTTGAACATGCGTCCAT	172	139	211	248	169	366	890	390	402
	PCGF1	TGAGGGTTTAGCATCAAGCGGT	115	180	228	394	210	144	485	238	205
	PRDM11	TGACCTCGTTTACACATCGCAC	175	143	205	652	239	721	240	431	488
	TADA3	TCAGACTTCTTCAGCAGGGCAT	155	161	208	118	427	88	357	723	402
	UHRF2	TATGTGAACTCATCACCTCGGT	165	165	194	6	373	294	313	327	122
	TSSK6	TCACGATGTACAGTTTCCCGTT	172	150	202	217	366	453	189	437	244
	FLYWCH1	TTCAGGCATCTCTAGGGCTGGC	128	209	188	32	140	110	150	422	373
	PRKCB	TAAACTTGTGTTTGCTGCGGGG	168	169	188	199	417	238	268	104	115
	RFXANK	TCTCTCGCTCTTTTGCCAGGAT	168	194	163	522	392	122	83	624	169
	DDB1	TTCTGCATTACCAGAGAGCCGT	128	253	146	258	331	359	392	66	133
	SF3B1	TTGAATTTCTCGAATCTGTGCT	138	198	191	27	223	94	4	256	126
	LMNB1	TACGACTTGAGGATGCTCGGGA	142	191	194	516	290	25	421	342	201
	PHC1	TTGCAGTCCAAGTACTCTCGTT	158	172	197	899	503	356	689	1	323
	ECE2	TAGATCTTCTCCTCGTCGCGCC	172	161	194	123	293	288	233	203	115
	ING5	TTCTAGGAAACATCCAGCGCTT	175	187	165	970	455	444	988	1219	327
	TAF5L	TTGTCACTTTGGAGGTAGCGGA	111	216	202	206	118	222	134	21	233
	DHX40	TTGTCTGCTTCGAAAATCCCAT	138	191	200	660	239	263	479	363	377
	BCORL1	TCCCATTGACTGAACACCGGGG	152	183	194	519	150	278	810	556	875
	UBA1	TTGTAGGAGTCAAGCTGTCGGT	155	143	231	621	443	372	380	601	341
	HDGFRP3	TTTCTTGTGTCGTTGCCCGCAT	155	191	183	219	656	359	450	3	226
	ACIN1	TAGTGTTTTCCCAGCTAGCGGC	172	169	188	370	128	263	198	485	344
	TADA2B	TGACATGAACTGGTACAGCGGC	142	169	219	89	439	75	198	538	180
	HIST3H2A	TTATGTCCATCAAAGGGGCCCC	142	194	194	394	449	281	227	369	405
	RUVBL2	TTGGCATTGATCTGCTCACGGA	222	143	165	253	236	82	259	116	384
	ZMYM3	TTGCAGTAGCTATGGAGGTGGT	142	209	180	118	239	362	236	182	509
	PARP10	TAGTTCGTGATCTGCCTGGGCC	145	172	214	279	13	256	246	69	40
	HMGN5	TTGGTTTCAGCAACTGCTTGGG	162	198	171	373	245	387	326	740	628
	TCEA1	TTGGTTCATCAGCACTACGGGT	165	172	194	227	296	366	246	226	47
	HIST1H4C	TAGCCGGTTTTGTAATGCCCTG	216	132	183	334	608	1267	718	1079	341
	ASMT	TCTTGTCTCCAATCCAGCCGTG	138	180	214	68	630	334	437	265	527
	ART1	TACACTGAAAGCACACATGGCC	168	187	177	1017	424	497	622	452	140
	BRD2	TTTGGGATTGGACACCTCCGGG	135	213	185	118	478	846	303	672	577
	L3MBTL2	TAAAGAGTCTCGATGGAGCGGC	145	183	205	501	411	593	469	256	509
	BRPF1	TTGTCAAAGATGCTGATGCGGT	165	205	163	441	147	306	42	708	158
	APBB1	TTGTGGTAAGAGAGCTGACGGA	172	187	174	582	675	75	1	247	58
	PRDM11	TGTGTCAGACACAAACACCGGG	135	194	205	120	115	181	405	90	108
	HDAC9	TTCATGTGGATCTGCTGCTGGT	138	202	194	238	303	206	463	27	79
	TLE4	TCAACTTGCAGCATCCATCCAT	145	158	231	415	112	359	153	687	373
	USP21	TTCCACATTAGGTTGGCTCGGT	158	202	174	438	58	247	87	1	301
	HIST1H4H	TCACGAATCACGTTCTCCAGGA	162	158	214	58	58	291	255	87	545
	GTF2F1	TCGTTGATCATCTTGCGCTCGG	165	150	219	389	191	88	166	107	258
	SUB1	TTTAGGCATCGCTTCGCTCGGC	165	169	200	688	395	587	858	241	183
	HDAC1	TCAATGTACAGCACCCTCTGGT	168	161	205	157	226	253	447	384	294
	EYA2	TTGTACATCTCCTTCACCCGCC	175	128	231	493	125	294	278	200	223
	MCM7	TAGGTCATTGTCTCGGTCGGGC	205	158	171	730	67	469	201	39	276
	TBL1X	TCTTCTAGGAACACAAAGCCTT	152	158	225	378	236	771	1135	919	459
	HIST1H2AM	TCCTACAGGAAATTGGAGCCCA	158	169	208	527	389	122	880	69	137
	ZNF787	TAAAGCTCTTGCCACACTCGTT	168	150	217	370	290	397	784	509	83
	HIST2H2AB	TCTTCGTCATTCCTCACGGCTA	142	180	214	1074	653	225	737	312	402
	MAP3K12	TTGCTATTCCAGCACTGGCGAA	148	205	183	423	532	721	466	12	481
	PRMT8	TTGTGGTACATGGAGTTCCGGT	189	150	197	180	105	66	252	170	312
	KDM5B	TTTACTTTCGGCTTGGTGCGTC	125	187	225	686	369	431	189	535	294
	HIST2H4A	TTGTCTCTCAAGACCTTGCGGT	128	172	237	222	452	50	300	12	459
	HIST1H4H	TGCTCTGTGTAAGTGACAGCGT	148	187	202	128	338	128	1	87	176
	TDRD9	TAACATGCTGAGGAGAGCCGGG	148	209	180	688	417	206	373	18	577
	HIST1H4J	TCTGTATAGGTCACGGCGTCCC	162	187	188	264	570	194	606	42	172
	BRPF3	TTGAAGAGGACTGATGTGCGGC	175	194	168	527	322	244	408	3	1
	TRIM28	TTGAGTTAGTGCCAGGACGCTC	121	161	256	172	156	185	249	375	108
	HMGA2	TTCTGCTTTCTTTTGAGCTGCT	128	213	197	399	137	409	166	1	219
	DHX35	TTGAACCATCGACTGTGCTGGA	138	183	217	172	64	300	67	348	337
	HNRNPA1	TGAAGTTTCCTCCACGACCGAA	145	176	217	337	589	646	510	476	413
	HIST1H2BC	TTGCCATCTTTCTTCTGCGCTT	155	209	174	331	837	444	271	310	284
	CHD6	TTGTGCTTGATAGAGACGCCGG	162	154	222	321	290	141	354	9	198
	SUV420H1	TTTCGCAAGTGTAACACTCGCA	152	187	200	50	147	269	80	1	284
	DHX38	TTTAGGTCGATGTCGTGGGCTC	162	169	208	506	96	487	520	206	226
	APOBEC3H	TTTCGGCTGTTAACAGAGCCAT	125	227	188	285	198	128	55	357	72
	H2AFY2	TTCTTTGAGGTCAATTTCGGCT	179	187	174	378	589	206	380	164	387
	PRDM15	TTGTCCAGCTGTAACTGGCGTT	98	209	234	232	309	16	112	1	26
	Rpa3	ATTAGAAATTATAGGAGTCGCT	132	286	123	144	325	72	16	170	51
	GLI1	TTGGTGATTCATCTGGGCTGGG	142	205	194	600	786	378	565	1358	1337
	HIST1H2BI	TTAGAAGAGCCTTTGGGTCGTT	145	194	202	701	952	244	300	3	370
	KDM6B	TTTGGTAATGGTCAGCGCCGGG	155	198	188	415	201	341	373	1	241
	ATOH1	TTGTCGTTGTTGAACGACGGGA	168	165	208	571	519	157	338	36	101
	TAF1	TTTGTCATCATCAAGAGTGGCT	168	216	157	639	474	235	338	416	176
	PHF3	TTCAACAACAGTCTCACCCGTT	172	172	197	368	354	132	479	12	8
	TLK2	TTGCTGTTCATCAATCTGCCGT	179	191	171	222	618	930	297	880	549
	RPH3A	TAGAACTGTTGCTGAACACGGT	205	136	200	334	1047	197	654	381	1075
	HIST1H2AM	TGGTAACTTTACCAAGCAGCTT	125	180	237	475	570	615	361	324	212
	TAF3	TTGGGAGTAGTACACTCCGGGC	162	161	219	730	548	135	211	312	409
	CENPJ	TTGATTTCCAACACCGCTCCGT	162	172	208	37	131	138	122	9	258
	JMJD8	TCATCTCTGAGAATGGCTGGGT	148	147	248	313	322	440	287	200	352
	NSUN5	TCGTAAGTCATCGAGGCTGGAA	155	183	205	167	427	462	431	687	520
	JMJD4	TTGCAACTGGTACAACCACGTC	172	154	217	287	490	400	138	812	398
	RPS6KA4	TAGCACTCCTAACTCAGTGCTT	189	154	200	264	449	621	670	393	18
	PRDM15	TTTGGTGGCAACATTCTCGCTC	138	187	219	261	115	397	530	122	54
	H2AFB3	TGAAAACGAAAGCTCCGCTCGG	165	154	225	337	249	313	189	1	266
	CSTL1	TAAGTAGGTGTCGTTGCTGGCA	212	125	208	355	668	29	42	630	316
	HIST2H2AC	TTCTTTGGTAACAGAACGGCCT	155	191	200	303	134	291	1036	3	251
	C17orf96	TCAGATCTCTGACAACTCCCGC	172	183	191	355	198	893	243	143	237
	BABAM1	TAGGAGTGGAAATGGGCTGGGA	205	136	205	467	233	378	300	167	54
	HIST1H2BB	TAACTGCCTTAGTGCCCTCGGA	128	194	225	219	233	341	262	1	180
	PCMT1	TCCAACATTTGGTTTCCGCCTG	138	172	237	212	255	497	348	702	237
	LMNB2	TTTCGCATCGTTCTAAGCGGCA	172	150	225	300	404	119	112	372	144
	HIST3H2BB	TTTAGAACCCTTCTTGGGCGCA	155	191	202	368	175	899	118	402	190
	RCOR3	TTATGCCAGAACAACATGCCAA	158	176	214	1204	576	397	217	173	198
	FBXW9	TCATAACAAAACCAGGGCCCAA	158	176	214	714	223	138	781	318	384
	FBXL19	TAACATCCTCGATCCAGCGGAG	165	183	200	582	201	72	281	179	223
	SMN1	TAGCTGGGTAAATGCAACCGTC	175	139	234	238	455	556	530	238	244
	ASAP1	TAGAAAACTTGACAAACGCGGT	192	165	191	300	210	259	287	437	613
	SND1	TTCGTCTGCATCATCAGCTCGA	108	253	188	126	188	459	93	315	40
	RCOR2	TTGTCCTCTACTGTCCACTCGT	145	176	228	368	452	231	405	149	423
	CBX2	TATGTTTGGAGGACCAGCCGCG	152	183	214	8	26	391	357	1	112
	SRCAP	TTCAACATCACGCTGGTGGGAA	182	136	231	378	265	506	58	125	104
	HIST1H4B	TCCAGAAACACCTTGAGAACGC	182	205	163	688	280	559	377	107	319
	SMARCD3	TTCCGCTTCTGTTTGCTGGGAT	128	238	185	316	369	347	549	749	119
	EHMT1	TTCTCTGGGATCTTTACTGGCT	135	245	171	6	242	353	99	1	506
	SUPT3H	TTCCATTGCGACAACATTGGGT	138	176	237	436	303	478	134	137	284
	MCM2	TTGAGAAACTGCGACTTCGCTG	145	187	219	240	315	362	443	155	137
	SIRT7	TAGACGACCAAGTATTTGGCGT	182	161	208	352	462	350	58	485	258
	HIST1H2BE	TGGTGTACTTGGTAACGGCCTT	192	154	205	566	509	362	345	734	244
	TAF6L	TGAACTGAGAGCTATTCTGCGT	138	169	245	292	156	487	342	470	151
	HIST2H2AA3	TGACAGCGATAGTAGTCACCGA	162	139	251	230	296	225	268	9	244
	CHMP3	TTTATGATCCAGCACTGAAGCT	172	132	248	146	153	1	45	304	155
	PHC2	TTATAGGCAAAGTCCACCCGGC	162	169	222	524	255	378	386	363	215
	PCMT1	TTGTGGATTAGCTCCGAGTGGC	168	191	194	316	404	506	944	143	552
	EP400	TAGACAGCAACTCTGCCTCGTG	205	180	168	71	287	369	74	217	244
	MIS18BP1	TAACACACAAAACACTTCCGCA	182	147	225	589	424	210	150	9	129
	AURKB	TGGATTTCGATCTCTCTGCGCA	185	150	219	368	446	263	160	259	524
	TADA2A	TCTTCAAGACTTCAGAACCGGC	185	172	197	199	443	107	240	702	208
	HIST1H2AI	TAATCCAGGCTTCTACTTGCCC	199	158	197	873	277	765	418	30	531
	WBSCR22	TCAATCATCCGTGAGTTGCGAA	199	172	183	925	433	665	810	809	330
	ADA	TTGAGTATGTCCACAGCCTCTT	185	165	205	191	328	628	698	877	413
	NAA10	TTCTCTTTCAGCTCCAGGTGCC	125	220	211	128	226	609	482	301	212
	CXXC1	TTCACAGGTAAAGTGACCGCTT	162	220	174	344	408	522	434	283	309
	TCF19	TTGAGTTGTGCTGTATGCGGTT	195	161	200	123	529	859	224	161	699
	ACTR3B	TTTGTCAGCTAGCAGCTCGGAG	138	234	185	217	662	394	491	298	223
	MTA1	TTGACGCTGATTTGGTTCGGAT	165	187	205	496	414	338	125	1094	266
	CARM1	TAGTCCTGCATCATGTTCTGCT	236	161	160	386	490	518	396	39	258
	CBX7	TTCAGAACTTCCCACTGCGGTC	175	172	211	582	614	518	20	1136	237
	TAF5L	TTTGAGTGGTCTGTAGCTGCTC	185	154	219	110	236	450	90	152	208
	FOXP1	TTTGCAAACAAAACCAACCCAC	121	216	222	175	411	621	192	1	398
	NTMT1	TGCCTTTTGAAGAAGAGCCCGC	158	176	225	16	131	481	42	179	180
	DHX16	TAAGCCTTCTTGTCTGACCGTT	158	213	188	206	204	197	418	232	119
	ZBTB40	TTGGTAGAAACAGTGAGCCCTT	158	227	174	318	125	107	485	84	316
	METTL7B	TTTGGATTTCGGAGAACTGGGC	168	180	211	800	401	522	510	645	660
	MBD6	TTGTAGGAGGAACTCGACAGGG	172	213	174	907	688	1105	443	874	377
	EIF4A2	TTGTTGCACATCAATCCCGCGA	179	172	208	154	83	447	90	241	158
	HIST1H3D	TCAGTCTTGAAGTCCTGCGCGA	179	180	200	251	182	122	153	244	22
	EDF1	TGGTTATTGGGTATGGCCCGTC	125	187	248	308	497	625	208	437	405
	PRMT5	TCACTGACAATGATGTCTGCTT	145	187	228	292	99	359	453	1	8
	RNF20	TAGCTCACCAAGTTCTCTCCGT	162	202	197	118	153	47	134	15	1
	ZGPAT	TGCAGTTCTCCTTAAAGCGGCA	179	143	239	157	322	253	163	627	294
	HIST3H2BB	TTTTAGAACCCTTCTTGGGCGC	182	165	214	641	917	350	182	185	312
	DDX54	TTGCCATCCAAGATCACCGGGA	195	169	197	149	245	406	558	75	341
	GTF3C4	TGGTAGGTTAAGAAGCACCGGA	202	154	205	410	468	759	224	298	230
	HDAC4	TTGTAAACCACAGTGCTCGCAC	219	154	188	196	350	22	176	613	40
	PARP4	TTTTGCACCTCAAAGCTCGGTA	158	187	217	311	299	543	227	476	348
	FABP1	TATTGGTGATTATGTCGCCGTT	182	187	194	165	325	391	539	155	391
	RNF40	TAGGGTAGATCACAGCCTGGGG	256	107	200	621	532	378	268	520	255
	DHX38	TTGAGCATGTTGTCCTCCGGGG	145	242	177	337	93	219	224	119	180
	FAM208A	TCAACTGTGACAACCTCTGGGT	152	224	188	331	519	210	198	179	158
	SUV39H1	TGAGTCTGGATATCCACGCCAT	165	125	274	574	115	256	428	1	29
	MED1	TTTCCTGCAGAAACCAACGGGA	179	183	202	326	77	175	58	538	158
	BABAM1	TCCTTCTAAATCAGCCGCCGAC	185	154	225	451	376	235	781	720	448
	FKBP2	TTTGCGCGATTTGATGGGACAG	145	198	222	225	309	125	236	304	101
	RPS6KA4	TTCTCCAGTTTCAGGTCTCGGT	145	220	200	357	147	540	169	381	706
	USP46	TTTGCTTCTGGTCAAGTCGGAT	158	227	180	587	503	709	800	806	545
	HIST1H2AH	TCCAGTTTTCACAACCTCGCTC	162	198	205	819	245	494	204	173	645
	RAG2	TAAGTTTTGGCCAACTGCCGAA	165	158	242	407	627	191	169	357	183
	PHRF1	TAGATCTTGTCGCTGAGCTCTT	182	158	225	316	220	256	517	143	237
	USP46	TATGCCAACACATTCTCCCGGA	152	183	231	587	974	213	150	1204	122
	CBL	TAGAACAGTGCTGAGCAGGGTA	212	92	262	433	239	194	667	770	298
	PRKCB	TAAACCAGCCATCAACACTGGC	168	165	234	232	455	344	310	66	434
	HIST3H3	AGGTCGGTCTTAAAGTCCTGAG	192	161	214	548	506	659	1017	791	534
	SNRNP200	TTTTCTAGGCACATGTCCCGGA	128	209	231	146	220	85	389	339	266
	EYA2	TTGTCTGTCACTCAGAGTCCAC	155	202	211	701	354	512	361	21	477
	SP140L	TTCCTGACAACACTGTTGGCTT	175	202	191	209	462	241	609	559	284
	AP2A1	TCTCCTTTGAACTTGGAGCGGA	179	161	228	988	468	806	227	307	344
	EMG1	TAAACCTGTAGCAAGCCAGCTC	199	161	208	509	299	728	335	856	255
	ZBTB40	TTGATGAGAACCAGCACTGGGT	135	209	225	925	465	188	431	518	380
	PHF8	TTCAACACCAACACAACTGCCA	148	187	234	232	105	250	246	116	223
	ZMYND8	TGTTGATGTGTCCTGCGGCGAG	162	176	231	141	439	506	138	1	362
	CXXC5	TTTTGTGCTTTGAGGTAGGGTT	172	183	214	438	334	107	354	541	97
	PRDM6	TAATAGTCCAGCTCCTCTGCGC	175	169	225	225	179	303	530	277	97
	CBX1	TTGTCCTTCATAGAAGGCCCTT	175	220	174	582	204	125	144	27	416
	MAU2	TAACATCTTCGAACTGCGGGAT	189	132	248	582	385	646	386	366	606
	PARP6	TCTTGTGCAGACATGGTCGGAC	192	172	205	605	102	303	377	182	344
	C17orf49	TTGCGTTTCACAGTGGCCTTTA	199	165	205	27	408	472	600	229	140
	CDK5	TCTTCTGCTGAGATACGCTGGA	155	187	228	381	347	503	1537	859	954
	PRMT8	TTGAACACGTGCTTGTTGTGGT	165	205	200	133	144	119	48	69	223
	PNMT	TCAAAGAACAGGGAATCCAGGT	179	183	208	441	325	125	169	12	248
	CENPN	TAGTACACCACGTAGGTAGGTT	209	176	185	105	214	406	83	503	79
	PCGF2	TTGTTGCGGAGAAACTTGGCAA	148	238	185	219	299	25	1052	509	233
	SLBP	TACGCAATTAAGCTCGCTGGAA	152	202	217	258	643	284	437	619	273
	ZSCAN21	TTTGTGACTGGTCTCCAAGGGC	158	216	197	123	497	309	354	740	359
	MBD3	TGTGCTTTGACTCTGACAGGGA	172	165	234	469	703	362	558	1	172
	ZNF451	TCACTGACAAACTGAATGTCGT	172	205	194	27	284	128	169	1816	352
	SIRT7	TATCAGGGTACAACCGCAGCAG	175	216	180	100	344	391	377	271	828
	ZBTB33	TTGTTTGCCATCTCGCTGCCAG	142	202	228	139	245	338	255	36	47
	ACTA1	TTGGTGATCCACATCTGCTGGA	145	205	222	412	322	309	58	675	323
	HIST1H4B	TGCCTTGGATGTTATCCCGCAG	158	172	242	691	233	238	915	428	409
	PHF15	TTGACCTCATCGTTGTCTGCTA	152	202	219	360	255	406	584	6	94
	DHX58	TATACACTCTGATCGGCCCGGG	168	143	262	245	579	703	157	351	280
	UBR5	TTCTGCTCTAAAACAACCGCTT	168	220	185	449	121	553	39	9	359
	ASMT	TAAAATGGCATCATAAATGGCT	179	172	222	188	401	141	294	1	108
	PARP6	TAGGATGCATTGACCAGCCCAT	232	150	191	339	226	475	329	678	205
	DDX3Y	TCTTGTGACTTTGAGCTCCCTT	155	194	225	391	646	465	357	51	198
	ZAR1	TAGCTGTCGAAGTACTCGGCGG	162	161	251	251	128	116	424	277	83
	LMNA	TGAAGTTGCTTCTTGGCCTCAC	192	194	188	344	363	378	354	128	180
	CHD8	TTTGACTGGTGGAACACTCCGG	158	198	219	415	319	169	249	6	251
	MYPOP	TTGTCTTACAACTCCCACCCGC	172	161	242	397	115	478	109	369	241
	CENPM	TGGAGATGTAACACGCCAGCTG	189	161	225	238	474	543	412	324	402
	PARP9	TTCCCTTGCAAACTAACCCGGA	148	245	183	264	252	238	322	211	198
	DCTD	TACTACAGCCTTTCACATCGGT	158	176	242	516	249	347	102	292	402
	FBXO17	TTTGTCACACAGCATGATGGCC	162	183	231	753	417	231	287	1156	1111
	RECQL5	TTTTACTACAGCCATGGTCGCA	165	194	217	232	376	253	42	375	86
	EPC1	TAACAAAGCTGAACCTGCCGTT	179	172	225	740	331	266	1396	310	459
	PBRM1	TTGTCGCTCTCATTGTAGCGGC	189	180	208	53	563	634	220	208	334
	NAP1L1	TTACTTGGCAGTGTGCATGGGC	168	202	208	574	424	1096	482	3	101
	ADPRHL2	TTGCTTGAGAAAGTGCTCGCTG	172	187	219	808	153	759	255	134	405
	APOBEC3B	TCCCAGTAGTAGTAGAGGCGGG	175	158	245	157	109	462	1234	280	119
	RNF168	TTTACTGAGCAGACGAACTGGC	182	165	231	313	252	362	514	12	205
	BCOR	TTTTGCACAGTCTCTTCCCGGA	182	191	205	691	277	272	1479	1	391
	PRDM16	TAAAAGTGCGTGGTTGTCCGAC	162	209	208	191	497	238	166	960	155
	RUVBL1	TTTAGCAAGCAAGTTGGCCGGG	172	202	205	496	487	288	4	378	219
	CENPB	TCGTACCATAGACTGGTCTCGG	189	216	174	456	226	309	377	907	391
	DDX39A	TTGACAGGCTCAATCTGCTGTA	142	216	222	157	284	490	306	523	205
	BRPF3	TATGACTCTTTCTCAAGCCGGT	152	194	234	219	309	1208	58	327	237
	CDCA7L	TTGTCGACACTGATGGCACGTG	158	220	202	100	325	222	361	220	402
	HDAC7	TTGGGTTTCTGTTTCCAGCCTT	158	245	177	641	296	197	542	283	301
	JMJD7	TTTTACGACTCACAGCTACCTT	162	187	231	451	443	303	638	372	413
	MTF2	TTGTCTAACACCATGCATGGGT	236	161	183	386	277	637	297	339	552
	HNRNPA0	TTCAACACGCAACTAGCAGGGC	148	231	202	847	598	79	112	393	22
	FBXW9	TTTATCTCGCCGAACTGCTGCC	152	224	205	165	312	160	804	1266	151
	RAD54L2	TTTTCTTCGGTCTACCTGTGGC	165	205	211	417	182	325	494	416	914
	CTSL1	TTGGCCATCTTTACGTAGCCAC	175	238	168	342	385	837	463	1136	409
	PHF12	TCTTTCTTTGCAAAGTGCTGGT	226	161	194	722	309	338	820	702	165
	UBR7	TCTCTCTTAACAACCGTGCCTT	158	213	211	764	656	412	322	654	312
	DHX9	TTTGTCGCTGAGATGGTTCGAA	168	209	205	256	153	487	447	191	79
	SKIV2L	TTGTATGGAAGGCTCCTCGGGA	175	216	191	475	249	699	45	1058	291
	MECP2	TTGACAAGGAGCTTCCCAGGAC	179	209	194	232	131	238	115	485	391
	TRAF7	TCTTCTGACACTTGTAGGTGGT	165	213	205	404	414	203	396	488	140
	DHX34	TTGGCCATTTCGTACAGTCGAT	195	205	183	485	153	138	985	158	778
	JMJD8	TCACAGGACAAGTACATGGCGG	165	194	225	123	255	428	13	197	420
	PPP4C	TAACCTTCCATCACCAGTTGGT	179	183	222	443	462	394	262	675	470
	PRMT5	TTCCAGATTGTCCATCAGTGGC	195	249	140	509	369	107	236	104	226
	HIST1H1C	TTTTCTCCACATCATAGCCGGC	138	202	245	282	751	288	635	954	205
	TAF1	TCTTTTCGCATCTCTTCCCGAT	185	161	239	326	223	381	271	1	237
	ORC1	TACAGCAGAAACATGCAGCCTC	202	158	225	251	188	172	64	9	18
	HIST1H2AA	TCAAATTGCAGCAACACGAGAA	145	216	225	68	322	122	195	203	294
	MYSM1	TAAAGGACTAGAACACCGTGGT	158	180	248	389	443	194	204	565	90
	TDRD10	TTTTGTGGACATCAAGAGGGTT	162	216	208	360	277	375	322	12	470
	SETD3	TAGCAATTTTCGTGGAACCCAT	189	172	225	696	140	278	243	1	610
	PRMT6	TAGCACTCGTAGTACAGCTGGT	162	191	234	386	334	50	51	951	158
	PHF12	TGTAGGTGTCTTGTCAGCTGTT	168	165	254	16	293	291	278	1	79
	MED1	TTGCACTCGAAACAGTCTCCTG	179	180	228	829	872	637	361	342	108
	DDX52	TTGATAGTCTCGCAGCACTGAT	189	198	200	571	1018	328	1078	259	1204
	HIST1H4H	TTTTCCACCTTTACCACGGCCA	128	209	251	748	462	163	240	125	187
	DNMT3L	TTCAAGGTTCCAGTGGTCCGGG	142	209	237	436	551	615	106	351	36
	SKIV2L2	TTGCTTTCTTCAGTTCTCGCTT	175	202	211	558	303	328	523	345	413
	HIST1H2AI	TCCTTTGGGATTGAGTTGCTGC	205	169	214	243	376	275	246	532	402
	CHD7	TTCAACTCTGTCCAGGTTCGGA	138	220	231	589	732	366	354	149	925
	H2BFM	TCTCTTGTCCACATACTCGGGC	148	198	245	644	506	219	259	119	456
	PARP10	TGTAGTTCGTGATCTGCCTGGG	155	220	217	14	45	75	87	315	319
	PHF21B	TGTAACTCAATCCATCCGCGAA	168	128	296	282	242	406	345	473	269
	SMARCD1	TGGAAGTAGAACTCAGCTCGGC	192	183	217	305	105	169	233	696	172
	CENPN	TCATCCATCTCTTTGGCACGGC	202	165	225	430	354	628	338	512	341
	GLI1	TTCACTGGAGCTTTAGCACGGC	148	234	211	707	290	160	262	173	233
	SKIV2L	TATACAACCTCAACCAGCCCAA	165	194	234	326	503	590	134	699	83
	HIST4H4	TGCCTTGGATATTGTCCCGCAG	179	180	234	193	185	412	472	832	334
	MYBL2	TCGATGATGAGTTCGATGCCAG	135	231	228	217	376	284	198	360	903
	DQX1	TTCAGCAGCTCATAGTAGCGGG	142	213	239	209	360	160	192	312	194
	NSUN5	TGACTGGTCTTATTGCCTGGGG	172	154	268	582	716	543	189	526	262
	HIST1H1E	TTCTCCACGTCATAGCCAGCGG	172	220	202	428	188	528	641	1	610
	NAT10	TGTCGCATTCTTTTCTTCCGGT	152	187	256	185	86	581	87	137	137
	APOBEC3C	TTTGCCTCCCAAATTGCTGGGG	162	216	217	139	821	852	195	33	144
	CHD5	TTGAGGATCATGTACCGTGGGT	175	172	248	1	487	278	45	636	165
	HIST1H2AC	TCTTCTTAGGCAGAAGCACGGC	179	202	214	222	210	163	29	586	155
	SIK1	TTCATCAGCTGAACCTCACGAT	132	227	237	115	226	175	128	315	387
	SMYD1	TTCTTGTGGAACAGAGCTGGGG	172	267	157	300	1034	472	319	348	230
	CECR1	TTTGGCACCAAACATAGCTGGG	189	216	191	266	567	406	377	21	147
	GADD45B	TTTCTTCGCAGTAGCTGGCCAC	158	220	219	8	163	119	39	226	395
	MCM2	TACTTGACCATGCTGAGCTGGG	168	224	205	787	691	322	23	96	739
	PRDM7	TCGAATTTTAACTACCAGGCTT	175	231	191	808	179	1018	692	752	334
	TADA2B	TCTTCCATCTTGGTGATCCCGT	212	220	165	55	115	1055	1049	140	810
	BRD3	TAGCACTATGTCATCTGTGGGC	226	180	191	170	67	185	147	235	115
	H1FOO	TTCCTGGACAAATGTGCAGGTA	185	205	208	780	455	431	1036	464	545
	CHMP1A	TGCAGAAACTCAACACCAGGAC	158	227	214	751	147	600	450	726	198
	RNF20	TTGATAGTGATTGTGCCGCCAT	172	202	225	488	592	278	383	838	731
	MLLT10	TCATACTATGGGAGACCTCGTC	219	172	208	462	481	206	784	345	778
	HIST2H2BE	TAATTGAGAACCGACTCCTGGG	145	213	242	720	439	753	230	684	359
	HIST2H2AB	TGACTCTCCGTTTTCTTGGGCA	168	187	245	321	462	250	265	191	452
	ASF1A	TTTCTGATGTGGACCATCCCTT	179	224	197	178	319	269	198	12	172
	UBR5	TTGCTGTTCAACTTTGACCCAT	185	198	217	681	417	1295	772	30	230
	HMGN1	TTCTTGGTTAGCCACTTCGGCC	192	194	214	634	742	235	794	60	391
	SENP3	TACTGCAACACAAAAGCACCAC	239	161	200	884	287	297	316	125	327
	DAXX	TTTGCCTTTCCACATAGCTGTT	118	227	256	774	643	812	695	330	706
	INO80B	TTTTCTTGTGCACTCCATGGCC	148	191	262	139	640	203	730	363	241
	HDAC4	TTACTGTCCAGTTTCTGCCGGT	148	205	248	290	350	206	220	627	477
	SENP5	TGCAACTACAACCTGATGCGTC	155	209	237	139	449	132	1	39	187
	MIER2	TAGATCTTCTCACAGTGCCGGT	155	227	219	394	624	497	348	660	198
	CSF2RA	TGAACCTCAAATGTGACTCCTT	162	165	274	105	347	316	125	36	187
	DDX31	TTGTCCTTTGGGTTCAACTGGT	182	191	228	397	401	213	319	351	133
	MORC2	TTTGGGAGAAGGAACCTCCCGA	185	205	211	290	179	503	278	214	169
	SMYD1	TAAGCTGGTAAAGACCACCCAG	205	165	231	761	99	353	351	871	226
	NR2C1	TTCGTGACCTCTTTCTCGGCTC	132	293	177	644	223	132	249	3	219
	GFI1B	TTCATGTCGGACTTCTGGTGGA	152	253	197	256	420	478	259	405	1047
	AURKA	TCGAATGACAGTAAGACAGGGC	165	220	217	347	506	200	125	107	248
	TNRC18	TTGTCGATGATGCAGGAGCGAG	182	209	211	217	427	300	351	21	158
	ADA	TTTCAGGCTTGATGGATCCGTC	185	209	208	217	265	188	316	63	65
	HDGF	TTTCTCGTTCTTCTCCTTGGCT	142	216	245	29	144	300	332	494	319
	HIST1H2AE	TTAGGCAGCAATACGGCCTGGA	145	213	245	3	93	331	153	648	936
	BOP1	TCAACAGCTGATCTGTGCTGCC	145	224	234	178	175	465	791	3	330
	DDX39B	TTCACAAAGATCACCACCTGGT	172	220	211	222	144	272	227	33	140
	HIST3H2A	TCAAGGAAAAAAGACAACGGCA	199	165	239	571	843	568	112	292	549
	CHMP7	TTGAACAGTGTCCAGCTTGGCA	205	176	222	337	166	494	93	1	344
	DDX51	TCTGGGAGTACTTTTCACCGTT	172	224	208	219	284	675	252	6	749
	MTA1	TAACAAGTCGGTGATGTCTGCC	182	205	217	188	309	303	392	197	97
	APOBEC3C	TAGTCCATGATCTCCACAGCGA	185	180	239	308	538	469	523	1231	391
	RECQL5	TCATAGAAGAGGTTGGCCCGGA	216	180	208	673	102	213	297	1	4
	HIST1H4K	TTTGTTGATAGAAAGGGACGCT	135	256	214	3	252	425	1033	9	287
	PIAS4	TTCAGTCCACTCTTACTCCGGC	155	267	183	141	195	288	122	18	409
	SETD2	TCTTGCTCAAACAACTTCCGGC	158	202	245	920	506	122	577	705	656
	NFE2	TTCTGGTCTAGAGAACTCAGCT	172	216	217	71	166	284	55	274	319
	MPL	TAGCTGTGAACAGTACCCGGGG	182	169	254	360	322	116	58	482	1656
	CXXC5	TCGATTCCTACAACTGCTGCAC	185	220	200	501	350	381	440	342	438
	PAX5	TTGAGGATTGCAAAGCACCGTA	192	176	237	428	1397	1211	160	485	1255
	GATAD2A	TAGCTCAGCATCAAAAACCCTA	192	202	211	558	290	518	310	1139	359
	FOXO4	TTGAACTGCTTCGTGGACGGAA	192	202	211	472	175	284	1	226	319
	SAP25	TATGGACAATGGGTGTCTGGGG	205	209	191	170	360	341	377	553	86
	HIF1AN	TAATGGTCAGACTAGCTCTGGC	216	187	202	178	150	138	102	470	398
	CHMP1A	TTGCAGAAACTCAACACCAGGA	145	227	234	193	439	135	698	3	312
	SETD3	TTGCTCTCAAACCAAAGCCCTC	158	234	214	373	579	612	319	642	169
	MYBL2	TTCTCCTGCATGAAAAGCTGGT	162	227	217	360	331	225	16	3	255
	METTL6	TTAGCTCCTCAAACTCTCTGGT	179	176	251	370	325	172	338	1011	176
	BABAM1	TTTCTCTGGACAGTTGACCCTT	185	213	208	123	420	194	300	1020	201
	TDRKH	TATAGGCAACTGTTGCACTGGC	249	180	177	308	134	135	198	9	29
	H2BFWT	TAGTTGTGGCTGATTTCGTGGG	269	183	154	201	112	522	303	440	355
	SAP25	TGCTTTGGCTTCATACTTGGGG	175	198	234	654	525	181	300	755	721
	HDAC7	TCGGTGGTCATTAAGGACTGGG	175	224	208	144	417	194	29	452	370
	MARCH5	TTTTGGAGGACATCACATGGGT	179	180	248	292	280	272	316	627	316
	MLL	TTTGTGAATGAGGAGGTCGGTC	209	213	185	623	354	288	354	405	54
	FXR2	TTGTATCTCGAAGTGGGCCGGG	125	264	219	717	290	153	195	1091	155
	PRMT2	TCAATCGCGTTTCTCCGCTGAG	152	191	265	420	299	440	890	627	502
	RFX4	TCTGTCTCCAGTATCCATCCTT	158	176	274	407	191	203	287	749	398
	MORC2	TTGGATGTGAGCAATCTGCCAG	195	165	248	493	293	646	313	107	405
	CCDC101	TGAGAAGTTCTGCAATGCGGGA	172	161	276	308	363	197	128	3	359
	HIST1H3D	TTGCGAACTTCTAAACCCTGCC	179	213	217	370	312	79	271	408	144
	RPS19BP1	TCTTCTTCTTGGTCTTGGCCAC	179	194	237	271	544	341	224	381	294
	HDAC4	TTCTGCTTTAGCCTGGACCGTA	182	209	219	691	347	250	644	1513	552
	DNMT3A	TAGAACTCAAAGAAGAGCCGGC	185	169	256	303	58	319	192	15	144
	CXXC1	TTGTGCTTCTGCTTCTGCCGAT	202	183	225	402	299	646	67	69	151
	MEAF6	TCAGCTTCCTTAAACTTCCGGT	202	187	222	456	538	384	412	12	445
	MGMT	TTCCACACTCACTTGGCCTGTT	165	245	202	217	67	288	173	1	155
	HIST1H1E	TTTGGGTTGTGTTGGGCTTCTA	165	253	194	649	312	303	243	170	248
	SMNDC1	TCCTCTGACATCTTGTGTGGGG	212	169	231	579	430	191	32	556	341
	BCOR	TAACACACTGTACATGGTGGGT	216	172	225	503	455	141	125	336	86
	USP27X	TTGTGTTGTTTCGTCTCTGCGT	135	231	248	118	118	244	106	149	298
	ELP2	TTACCCAGTTTTCATGACCGGC	142	224	248	217	239	593	402	277	427
	RNF40	TTCATCTTCACAAGCCTGCCGT	189	180	245	391	144	303	1	3	398
	MPL	TTGATAACAGGTCTCTTGGGCT	189	183	242	107	408	175	641	1	72
	HIST1H2BF	TGCTTTAGCACCTTGTACACGT	189	191	234	183	102	132	654	194	516
	CECR1	TTTTGCAAGACTATTGCTGGTT	205	161	248	420	541	316	99	627	495
	HIST1H2BO	TTGGTTACGGCTTTCTTGGAGC	168	213	234	27	268	403	67	42	65
	NFYB	TTGTTGTTGACCGTCTGTGGTT	168	242	205	128	245	247	641	378	169
	PBX1	TTGAAATTCCGTCTCTTCCGCC	172	172	271	110	319	344	587	170	291
	ING3	TTCTAGGTACAACATCGCGGCC	189	238	188	683	303	372	166	1	233
	HIST3H2A	TTTATGTCCATCAAAGGGGCCC	165	209	242	391	503	437	536	149	223
	AKAP1	TTGCTTACACACCTCAGCTGAT	165	209	242	14	808	306	510	176	194
	APOBEC3F	TTCACTTCGTAGCACAGCCAGA	195	227	194	1288	605	690	606	835	416
	ADA	TGAGCGAGTAGTTAGCCTGGTC	105	202	310	649	239	568	233	208	355
	SMARCB1	TTCTCATGGATCACAGCTGGGT	158	242	217	185	522	275	240	411	291
	H2AFZ	TTAGGTGTCGATGAATACGGCC	219	198	200	326	557	484	593	21	692
	SMARCB1	TTTCTGAAAACATCTCAGGCGT	185	191	242	402	77	509	83	431	258
	FTSJ3	TCAGCTTGAAAGCAGATCGGGA	192	198	228	178	249	406	877	565	341
	MBD4	TTTGCTGGAAAAATACAGGCTT	155	245	219	120	350	359	166	422	198
	EHMT1	TATACGACTCAGAACCGAGGGC	168	220	231	269	255	157	122	304	122
	KLF1	TATCACACCTGGATCCTCTGCA	172	205	242	694	360	1	179	773	205
	HIST1H4E	TTTAAGCGGTAGCATTAGCCGC	175	205	239	334	363	796	118	399	585
	SAP30	TTGAACAGGTGAATCACCTCCA	185	209	225	438	217	175	612	369	1312
	H2AFX	TTGTGCTGGTATCTAGGTGCTT	189	213	217	355	166	160	214	298	255
	PADI4	TTTTCAAAAATACTGCACGCGT	189	216	214	350	369	160	284	155	112
	APOBEC3G	TTGATCATCATAGATGCGGGCA	202	183	234	290	175	122	383	9	563
	MTA1	TCTCGGAATAAGTTAGCCGCGC	138	231	251	347	815	334	217	610	298
	TRIM13	TAACTGAGCAACCTGCTAGGTT	202	216	202	219	207	185	281	18	169
	NAT6	TGGGTATAGAAGTGCACCTGGT	219	187	214	1014	182	272	300	1	155
	ASH2L	TTTCCTTGGAAAACAGGTGGGA	162	245	214	485	592	640	552	761	545
	FXR2	TTCTCTGTCATGTTGGGCCCAT	168	202	251	717	563	378	737	595	395
	JARID2	TTGAACAGGTTCCTTCTCCCGT	168	216	237	248	179	319	370	39	276
	H3F3B	TGAACTTTCTAGAAAAGCGGGT	175	198	248	313	322	347	364	119	409
	INO80E	TTGTAGTCCACTTCGCCGTCCG	179	234	208	178	214	153	217	3	129
	HIST1H3E	TCTTTAGGCATGATGGTCACGC	182	183	256	535	245	50	109	342	172
	KDM4B	TTCTTGGTGATGACCACCTGGC	195	198	228	618	230	684	428	390	280
	FOXA3	TTGTTGATGGAGAAAGGGTGGT	222	165	234	162	621	122	55	206	502
	HIST1H1A	TTAATGCCCAGCTTAATGCGGC	179	209	234	391	770	475	122	526	398
	C6orf130	TTTAAGGTAGGTTTGCCCGGTC	185	220	217	438	497	934	122	206	509
	RECQL4	TTGTGGTGAAGGAACCAGTGGC	175	231	217	3	140	341	4	455	151
	FBXL19	TTAACATCCTCGATCCAGCGGA	182	187	254	58	277	231	252	1	112
	DDX28	TTGGTTACCTGGTTCCTGGGAT	189	209	225	269	430	1058	217	408	825
	FOXP4	TTGCTAGAATCCACACTCCCAG	199	187	237	707	1076	1302	842	586	667
	METTL2A	TTGTCAGTTGCTTTCCTCGGTT	205	216	202	235	144	734	195	717	330
	HIST1H2BJ	TATAAAGCGCCAACGAAAAGGA	229	209	185	342	468	235	313	315	330
	KDM4B	TTGAACTTCCTCTCGGCCTGGA	118	224	282	681	179	525	265	330	280
	CHUK	TCATGTTCTGCTGAAGTCGGGG	148	245	231	483	204	600	138	203	269
	HIST1H3F	TCAGTCGATTTCTGATAGCGGC	162	231	231	97	382	578	102	268	194
	BAZ2A	TTTGTGAAGTGCCTTCTCCCGG	162	249	214	553	140	216	157	194	144
	EP400	TTGCTGTTGAACAACTTGAGGA	199	249	177	165	290	75	173	9	208
	ATAT1	TACTGGAAGAGTTCTCGCCCAT	205	172	248	735	474	428	255	390	301
	DDX11	TCTTCTCACAGTATCGCTGCAC	212	191	222	337	382	188	246	6	162
	HIST2H2BF	TGCACTTTCGTAACAGCCTTTT	165	205	256	782	821	799	772	939	341
	AIRE	TCTCCTGAAACTTGTCCTCGGG	175	183	268	157	436	406	431	467	599
	FOXA3	TGATGTCCATCAAAGCACCCAA	179	154	293	279	274	200	485	589	101
	PRMT7	TATCGATCAGTTCTGTCCTGGT	185	187	254	438	474	110	370	21	481
	HIST1H3F	TTACGAGCTGTTTGCTTCGTGC	202	205	219	329	223	659	192	176	172
	RCOR1	TTGTGTTACACTAGCACCCGAC	212	220	194	537	338	175	424	467	198
	HINFP	TTGAACTGGTGCTTCTTGCGAA	175	198	254	600	325	313	185	824	556
	HDGFRP2	TTCACAGACACATCGGAGTCGG	175	198	254	274	538	284	998	208	355
	TRIM66	TTGAACACTTGTCAGGCTGGAC	185	231	211	743	408	668	405	102	305
	RECQL5	TTCAGCTTTAGGCAGAACCCAC	189	216	222	162	296	621	714	755	162
	HDGFL1	TCTCTGAGGCTAATGGGCAGTC	195	213	219	519	156	362	227	755	387
	HIST1H4B	TAAACCACATCCATGGCAGTGA	222	234	171	292	490	144	466	339	280
	PPP5C	TTTCCGGATGTCATCCAGGGTG	138	245	245	881	328	781	472	624	115
	MGMT	TGTCGCTCAAACATCCATCCTA	168	209	251	384	252	291	396	503	212
	METTL2B	TTGTCAGTTGCTTCCCTCGGTT	175	245	208	384	280	440	118	51	291
	ZSCAN20	TGAATCTGTAGCGACACTGCTC	189	165	274	774	363	384	367	592	230
	NEDD4L	TATGCTGTGAAGATGACTGGGT	226	183	219	238	274	300	287	556	172
	PARP3	TTAGTCACAGTCCTCACTGGGC	192	183	254	225	334	288	517	363	97
	PRDM10	TTGCTCTCGAAGAACTTTCCTT	195	172	262	357	697	294	208	1513	456
	HIST1H3H	TCCTTGAGACTCAAGCCCTCTC	205	202	222	860	303	472	189	506	172
	HIST1H2AJ	TTTATGCGCTTTTCAACTCGGT	222	216	191	602	452	587	265	54	29
	MCM3	TTATACTGGTCATACCTGCCGT	152	278	200	602	808	313	424	782	140
	C20orf20	TTCTGGCTGAACTTGTCCCGAA	152	278	200	485	287	768	294	289	198
	RBL2	TAGTTTGGCACAGAGATCCCGA	185	194	251	94	214	228	201	3	448
	HIST1H1A	TTTGGCAGTCTTTGGCTTCGTC	192	224	214	152	245	422	147	122	284
	HIST1H4D	TTGTCACGCAATACCTTACGGT	195	238	197	631	67	194	498	140	524
	POLR1B	TTGTACAACATGGTGCCTGGAA	179	224	228	425	455	840	469	577	352
	PRMT2	TCAGAGTTCCATAGCTGCCGAA	189	180	262	595	417	815	169	449	244
	BRWD1	TTATTGGACAAGACCAACTCCT	205	187	239	232	125	344	294	9	613
	INO80	TTGCCGTTCAAATAACTCCGGG	212	191	228	694	420	259	820	1058	266
	H1F0	TTCTGAAACTCTCACAACGGGT	162	245	225	384	274	110	504	951	76
	HIST1H3B	TTTGTGTCCTCAAAGAGCCCTA	168	205	259	423	519	253	278	532	208
	GFI1B	TTGACAGCAATAACTGCCAGTT	172	238	222	545	147	341	322	6	337
	TBL1Y	TAAACCAGAAAGTTCACCTCGT	185	216	231	321	277	275	367	506	215
	GTF2F1	TTCAGTGACATTCTGGCTGCTA	155	264	214	37	220	849	214	3	212
	HDAC11	TTGCGCTACAAGAACTTTCCAT	179	267	188	589	153	350	39	482	316
	CDA	TCATCTTGCATGTCACTGGCGA	195	194	245	298	306	210	348	1	251
	DHX58	TAGGTCTGGACTAAGCTCTGGC	279	161	194	277	459	384	230	149	40
	KDM4A	TTCAAGACAAACTCGGTGCCTC	152	238	245	446	185	203	392	155	43
	KDM5C	TTCAGGTCTAGCTTCTCTGGGC	172	238	225	287	166	366	447	51	742
	FOXO4	TAGACCTTCATTGAGGGTGGGA	222	205	208	159	306	169	67	1020	273
	H2AFX	TCAAACACTAGAACAGACGCCC	232	198	205	498	163	50	612	54	724
	SMYD1	TACTGCATGCTGAACTGCTGGC	152	202	282	24	191	366	93	30	219
	APOBEC2	TTTTGTTCCACCTTCTGCCCTA	175	224	237	730	478	515	494	122	165
	EDF1	TGTTGTTTGTTCTGGCCAGCAG	189	202	245	313	252	303	686	102	212
	MUM1	TTGTGGTCCACTTTGCACTCGG	189	205	242	420	334	543	332	6	276
	UCHL5	TTTTCTGTCAGACACAATGGCC	192	213	231	761	424	597	447	6	165
	ACTB	TGTGCAATCAAAGTCCTCGGCC	179	213	245	529	195	200	157	21	86
	HIST1H2AB	TCTGCTGACAGAAAAACAGCAG	185	213	239	430	767	606	1014	9	524
	EPC1	TAGAGGTACTGCATGTCTGGGT	192	191	254	81	156	821	48	81	72
	APOBEC3B	TCATAGCACAAGTAGGTCTGGC	222	198	217	256	99	16	26	378	434
	NSUN3	TCAAACAACAGGTGTACGCGAA	148	242	248	485	793	497	160	333	305
	FOXO1	TGCACTGTTACTAAACTCGGGT	199	154	285	344	207	469	504	859	638
	MBD6	TAAAGCTTCCATCAGAGTGGGA	209	187	242	548	411	777	533	208	162
	FOXP3	TTGTGTTGAGTGAGGGACAGGA	158	256	225	430	265	575	87	60	119
	CTSL1	TCTGCTTCTAAAACCTCGGGTC	168	234	237	628	481	715	214	321	269
	DDX47	TCAATCTGGATCTTGGTGGGTT	202	198	239	128	274	219	169	610	258
	DHX37	TAGCGTTTCTTGACCTTCCCAC	209	202	228	397	306	263	361	408	237
	MUL1	TTTCAGTCACACTCGCACTGAT	226	216	197	172	347	63	115	226	266
	ZBTB12	TTTGGGCTCAATGAACTGGCTG	179	253	208	475	420	909	428	610	484
	AP2A1	TCTTCTTGCAGAGACAGGTGAT	226	172	242	576	882	334	638	1617	301
	CBX2	TGTTCCTTCTTCTGGAAGGCCA	182	205	254	829	411	50	1157	113	628
	WBSCR27	TCTCACTTCCTCAACCTGGGTC	205	180	256	326	430	225	189	256	258
	ATM	TAGGTCTGCATGATGACCGCAG	313	128	200	300	245	225	233	461	456
	L3MBTL3	TCAAAGTGAACTTTTACCCGGT	195	165	282	196	277	590	96	113	563
	DDX55	TTGTTTCGCATGAACAGAGGGA	216	209	217	675	284	169	169	544	370
	PAX9	TCTCTCTGCTTGTAGGTCCGGA	232	202	208	397	121	60	402	30	756
	AURKB	TTCTCCATCACCTTCTGGCCAG	165	264	214	73	284	178	306	295	327
	C14orf93	TTTTCTGGTCCTGTCTCTGGGG	182	202	259	425	306	600	160	565	441
	BAHCC1	TTGACCTTGGGTTTCAGCTGGG	182	202	259	253	315	319	173	1	255
	HNRNPA2B1	TTTGGCTCAACTACTCTCCCAT	182	227	234	277	236	612	150	785	237
	SKIV2L	TTCACAGACTCCATGATGCGTC	138	227	279	475	544	419	268	503	294
	JMJD4	TAGTCTCTGAGAGTCATGTGCT	212	161	271	217	93	481	80	3	542
	FOXP3	TAGATCTCATTGAGTGTCCGCT	212	198	234	248	369	135	118	176	276
	ERG	TTGTACAGAGATGACTCCGGGG	216	209	219	600	398	341	58	110	237
	HIST1H2AC	TGTCAAATCACTTGCCCTTGGC	192	202	251	204	347	550	185	360	287
	DDX39A	TCTTGATGGAGAGACCACCGAA	202	198	245	660	312	303	233	6	305
	PRMT2	TACACGGTGATGATGTCAGCAA	202	198	245	339	455	687	727	518	298
	HIST1H3A	TGGACTTCTGATAACGGCGGAT	168	227	251	417	703	543	147	21	936
	ERI1	TTGATTCGGAGTTCACACCCAT	158	213	276	501	242	313	150	21	4
	PRDM10	TGTAATCACAAACTGACCCGGA	165	191	291	230	401	175	386	315	11
	PARP6	TTCACGAGTACAGACAGCTGGC	185	260	202	446	414	597	491	1	194
	NR0B2	TTCTGGTCCAATAAGCAGCCTA	185	260	202	238	529	238	498	304	241
	CDK5	TTGAGTAGGCAGATCTCCCGGA	202	245	200	529	160	47	51	1	97
	TRIM28	TTCTGTACGTCAGACACCTGGC	165	209	274	334	366	366	380	102	223
	HIST1H2BH	TTGTTGTAATGAGCCAGGCGGG	175	242	231	738	319	203	670	295	97
	TDRD7	TAGAACTCCTTTGACGAGCCAC	212	165	271	404	217	568	10	461	294
	RPS6KA5	TGTCCTTGTATGCTCTGTGGTT	179	205	265	618	640	855	823	791	484
	SMARCE1	TATGTAAGCAAGGTACGCGGGG	205	216	228	199	408	575	670	616	370
	RECQL5	TTAGCCAAGAACACAGAACCGG	222	205	222	644	131	91	606	84	377
	PHF17	TATTGTCGTAGCATCGCTGCTC	179	220	251	668	86	490	440	6	226
	UBE2M	TGTCTCACACTTCACCTTGGGG	182	234	234	178	271	447	71	954	513
	WDR61	TTTGCCATTTTCCAAGTCCCAA	226	136	288	1022	576	325	399	559	269
	PRDM14	TTGTTTTGAGACAGGGTCTGGT	162	227	262	472	315	425	399	143	459
	MST1	TTGTGAAACCTGTCCCTACGGG	175	245	231	342	249	132	402	12	405
	SIN3B	TCTGCTTGAAGTTCACAGCCTG	216	216	219	451	299	503	1090	292	22
	CHMP3	TTACTGGGTGCTTTGCCCAAGG	182	231	239	321	357	157	259	559	527
	ASMT	TAAGTGGGAACACTGACAGGTC	185	213	254	225	761	781	638	428	86
	FKBP2	TTTGGAACAGTCTGGTCCCTGA	239	205	208	621	347	266	176	731	1079
	SETDB1	TTGTATTTGGCGACCACCCGAC	195	216	242	360	245	462	268	3	69
	HDAC1	TTAATGTAGTCATCGCTGTGGT	199	209	245	451	312	500	189	87	94
	SENP8	TAGTGCACTTGATGAACTGGGT	226	213	214	193	312	344	7	1	129
	CHMP6	TTGTTCCTGAGTGATTGCGCTC	179	224	251	214	417	35	351	669	212
	FBXO44	TTTCCTTCCAGAAACCACAGGG	182	224	248	613	780	288	153	571	233
	SUPT7L	TTAGTGATCTAAGACCGCCGGA	195	194	265	1183	446	344	533	128	251
	SUZ12	TGAACTGCAACGTAGGTCCCTG	168	205	282	279	414	107	479	396	409
	PHF17	TTCATATTGTCGTAGCATCGCT	172	227	256	81	427	406	240	167	298
	HIST1H2BA	TTCTTGGAAATGGTAGCACCTT	205	205	245	381	560	568	192	812	287
	METTL7B	TTCTTGCTCTCCATCTTGCGGT	152	253	251	287	544	397	679	630	556
	TFPT	TTCTCTGCTTAGCAGGATCGGT	155	245	256	300	277	372	294	366	1097
	ATAD2	TTGCATTGGATCAACATCGGCA	175	216	265	1105	350	406	157	36	319
	TBL1XR1	TTGCTTGGAACATCTTGCCCTC	175	242	239	415	245	565	405	66	341
	STRA13	TGCACACTATTGTCCCAGGGAG	179	198	279	261	856	412	102	244	441
	ATXN3	TTTAGTCCTACAACCGACGCAT	199	220	237	357	595	313	192	853	122
	HIST3H3	ATGGATGACACACAGGTTGGTG	162	213	282	222	322	110	491	214	628
	CBX4	TAACACCACGTACAAACGGGAG	175	231	251	574	519	419	125	416	395
	RCOR2	TCAAACAGCACCTTGTCCTCTA	182	216	259	498	325	309	268	467	223
	SETMAR	TTTTGACACAAATGCATCCGGG	195	220	242	331	299	147	306	324	366
	FEN1	TTGAAGAAATCATCCAGGCGGC	205	213	239	587	147	328	421	113	420
	YWHAQ	TTTTCGATCATCACCACACGCA	175	209	274	595	474	391	179	1	233
	HIST1H3J	TGAATAGCACAGAGGTTGGTGT	182	180	296	397	341	175	169	3	169
	ELP2	TATGCAATTGACTCGGGCGGTG	189	213	256	102	754	191	558	30	441
	HIST1H4A	TTGGTTCAGAAATGCAAGCTGT	232	224	202	295	296	263	1020	1	137
	RFXANK	TCTCAATCTCTCCAAAGGCGGA	162	238	259	368	446	453	698	803	828
	DDX42	TTCTTCATCAAAGTTGGCCCGC	185	260	214	636	245	394	83	446	352
	C14orf43	TAAAATACAGTGTCTGGCGGGA	189	194	276	806	468	550	1	315	90
	HIST1H1T	TTTTAGGAGTTGTCGCTCTCGG	222	209	228	631	293	1164	616	146	301
	PHC3	TTACCTGTACAGCATGTCGGTC	222	209	228	157	509	497	861	1584	244
	PPP5C	TAAAGAGCTCGTACATCTGGGC	226	205	228	196	67	175	10	265	248
	TAF10	TATGAAAACAGGCTGGTGTGGG	239	183	237	699	436	328	233	208	710
	ZAK	TATACTTCCACAAAATCTGGCT	252	216	191	464	398	650	354	57	642
	UBE2E1	TAGGGTTCGTCTTTGAAGCCTA	286	139	234	634	207	478	418	211	126
	CSTL1	TCAGCTTCTTGCTTTGCAGGGG	185	216	259	71	280	618	326	859	65
	WBSCR27	TTGGTGACATGTAGCTCAGGTA	185	224	251	324	344	696	138	122	276
	CLOCK	TTAGTAGGAACAACTTGGCCTT	199	253	208	485	624	472	883	318	169
	HDAC6	TCTTCTACCTTCATGACCCGTA	179	231	251	227	700	715	545	93	502
	HIST2H2AC	TTTGGTAACAGAACGGCCTGGA	192	213	256	535	414	465	109	229	251
	PHF5A	TCACAAATCACACACTTGCCAT	205	202	254	318	93	181	7	292	269
	RNF168	TATCTGTGGAGAAAGTGTCGGC	236	194	231	162	140	122	303	24	305
	HMGN2	TACAACAACTTTCAAACTCCCT	273	180	208	483	392	194	125	155	373
	MAU2	TTGTGTCATGAGAAGATGCGGC	158	253	251	373	274	313	131	232	251
	HP1BP3	TTCGGAAACAGAACTCCTGGGC	179	264	219	300	115	503	13	336	237
	HIST1H3F	TTTGGTTTAAGTTGGCGCACAC	192	191	279	66	624	406	918	428	477
	UNG	TATTCCACCAACACCCAAGGAA	202	198	262	618	420	481	262	761	656
	HIST1H2BI	TAGAAGAGCCTTTGGGTCGTTA	242	172	248	225	303	453	20	402	241
	ACTR3B	TTTGCTGACTCTCTGATGGCAA	182	213	268	303	420	213	851	51	258
	SMARCA2	TTGGTGACAGTTTCTCAGCGGG	185	227	251	373	172	359	291	256	144
	SCMH1	TTGAACTCGTTGCTTGGAGGTG	209	172	282	503	156	497	456	107	83
	IKBKAP	TTCTGAACCAATGAGCACCGTC	182	231	251	344	583	547	185	39	248
	DDX47	TTGCTAGAAGAATGGAACGGGC	182	245	237	165	433	409	220	526	971
	ERCC3	TTTCGCAAGCTCTTCTCCTGAT	199	271	194	464	328	256	322	30	165
	GADD45A	TCTGTTTCAACACAGCTTCCTT	219	194	251	462	452	387	399	627	233
	HDAC7	TAGTGGTTAAGGGTGAGCCCGA	236	194	234	613	287	175	319	57	205
	FLYWCH1	TTTGCTCGCTTTCTGGGCCGAG	158	256	251	436	249	359	501	752	344
	ASXL1	TTTTCTAATACCAGGCGCGCGG	162	264	239	245	563	369	835	146	502
	CHTOP	TTTAGCACAACTTTCGGCGCTG	185	238	242	511	121	157	214	9	323
	PADI6	TTCTCCAAGCAGAACAGCTGGG	189	231	245	417	462	88	96	393	524
	PRDM2	TTATCTAAAACCACCACGCCAT	189	234	242	456	529	266	514	351	241
	MGMT	TTTCTTTCAGTGAGACCTGGGT	216	198	251	287	481	469	319	723	488
	TP53BP1	TTCAGCACACTTCAGCACCGAG	216	238	211	199	131	434	351	372	205
	BAP1	TTGTGGGTCTGAATCAGCTCTG	148	267	251	313	490	269	310	9	165
	ERCC3	TTGATTGCCACATATTCCCGGT	158	249	259	258	118	160	169	84	119
	USP35	TTTCTCCTCTTCGTGCAGCCGA	165	227	274	264	280	294	182	9	352
	ARID1A	TTGAGGGACATCATTACCCGCC	168	224	274	370	341	244	179	220	94
	ZGPAT	TTGTGATACTCCAGAGTGCCCC	179	216	271	485	882	484	622	1	620
	CDK3	TTTCGAGTCACCATCTCTGCAA	185	205	276	717	284	372	195	393	119
	RPA1	TAACATGGGATCGTCACACGGA	189	209	268	1160	51	175	211	1	305
	DDB1	TTATACTCCAGGATGCAGGCAT	195	209	262	253	404	350	77	191	380
	CCDC101	TTCTCTGTCTGCATCCGCTCAT	199	245	222	305	354	394	204	298	405
	NEDD4L	TATTTGACAAGTTGCATCGCTT	202	202	262	753	481	540	504	232	889
	STK4	TTGAAGGCAGAGAACAAGCGAG	219	242	205	222	395	787	702	523	198
	DDX52	TTATTAGGCACAAACCACTGGT	182	220	265	740	140	316	364	1819	882
	HDAC6	TTTTGGTCATAGACCAGCCCTG	182	231	254	584	166	244	485	301	241
	HIST2H3D	AAAGAGCCTTTAGATCGACCAC	202	183	282	566	201	437	804	488	208
	MLLT6	TAACAGGTCTTGTTGAAGCGAT	205	183	279	430	341	231	826	497	165
	AIRE	TTGTAGTCCTTGAACAGCACCC	152	242	274	496	738	659	198	877	341
	HIRA	TAACCTTTCCACAGCTGTCGGA	189	242	237	493	344	338	102	116	205
	DAPK3	TTGTTCTCGAAGATGTCGTGCA	192	242	234	243	506	1052	542	485	180
	APOBEC2	TTGCTCCACAAAATTCTGCCAG	202	227	239	780	188	328	233	18	427
	DDX23	TTGACAACCATAGACACATCTT	209	245	214	191	360	259	163	491	284
	PARP12	TACTGGATGACATACTCTGGGT	263	194	211	94	414	397	969	633	671
	MAZ	TGAAGGTACAACCTTTGCCGGC	165	242	262	733	242	597	141	592	176
	USP34	TAAGTCGCTGAATCAAACTGGT	185	213	271	498	188	259	83	336	187
	ATF7IP2	TTGTCTGATGCTCAGAATCGTT	205	202	262	668	303	547	208	289	420
	AICDA	TTGAAGGTGACCATGCATGGTC	212	198	259	243	535	834	440	1020	387
	SENP7	TGAACATGGACATCCTCTGGTT	175	202	293	475	369	665	542	541	373
	HIST2H2BE	TAAGACACAGTACAAACGCGGC	189	242	239	183	382	362	141	208	147
	SIRT6	TACTGCGTCTTACACTTGGCAC	209	213	248	214	360	341	338	895	230
	FBXO17	TTAGTCTCAAGGACAGACTGCC	239	220	211	344	255	228	969	1046	671
	SMARCC2	TTTGTGTACATGTCTGTGCGCA	249	216	205	727	255	259	354	565	83
	UHRF1	TTGGTTTTCTTGGATGTCCGGC	158	245	268	748	389	565	456	274	656
	DNMT3B	TAAAATTCGAAGAAGAGCCGGC	182	198	291	417	198	462	383	556	165
	PPP5C	TTGAGGAGGTCATAGAACTGGC	209	183	279	522	354	206	408	369	144
	DAPK3	TTGCTGAAGTACTCCTCGTCGA	209	245	217	438	166	331	316	66	133
	BRD1	TAGCATGTCAGTTTCCACCGGG	252	191	228	100	280	419	99	806	258
	LMNA	TTCAGGGTGAACTTTGGTGGGA	168	242	262	425	220	316	440	336	144
	DDX19B	TACTGCTTGATGGTGTCCAGGG	202	202	268	722	608	668	577	164	215
	DDX25	TCATCCAGGACAAACACACGAA	212	172	288	490	191	284	278	1115	223
	MECP2	TTTGATCACCATGACCTGGGTG	155	253	265	722	707	1052	568	298	377
	ZBTB4	TCAGGTATCACAATGGTCTGGT	195	264	214	66	277	213	367	538	352
	ADPRHL2	TTGGAGCTGTAGTTGGTCCCAG	216	209	248	670	1034	338	166	461	348
	BOP1	TCATTGTACACCATGCCATGGC	216	260	197	331	560	54	893	473	545
	HIST2H3D	AAAAGAGCCTTTAGATCGACCA	236	220	217	665	411	962	574	286	380
	SMYD5	TATAGCTGGTCAATGAAGGCGT	249	176	248	165	223	597	820	422	377
	ATR	TTTGGTAGCATACACTGGCGAA	189	231	254	141	198	91	227	268	115
	PHF13	TTGGCAGACAAACACTTCTGGA	216	216	242	144	210	347	536	1	54
	BCORL1	TAGAGAACAACATCCTTTGCCT	226	220	228	144	350	250	163	104	273
	ACTA1	TTGTGTCTAGTTTCTGGGCGGG	185	242	248	587	688	306	555	541	180
	TAF5L	TATCTAGGAATGCTCGAAGCTT	212	224	239	774	506	450	271	610	628
	PRM2	TTGGTGTTACTGTTGGTCTGGT	259	194	222	245	633	696	654	479	395
	RCOR2	TTGTTCCCAATCACCTCTGCAA	152	242	282	378	824	322	1798	229	986
	SMARCAL1	TTGTACCCAATCAACACCTGGA	172	256	248	751	265	656	469	1150	477
	CENPA	TTGACAAGCACAGTCCACTCAG	182	249	245	813	328	409	514	90	133
	CHMP3	TTTACTGGGTGCTTTGCCCAAG	189	231	256	209	325	206	402	461	194
	CLOCK	TTGACGTGCTTTAACTACCGTT	239	183	254	40	484	859	195	390	481
	HIST3H2A	AGCCTTTATGTCCATCAAAGGG	239	209	228	821	688	784	676	529	595
	USP27X	TTGCTTTTCCTGGTCTCTGGGG	182	224	271	529	624	540	443	610	384
	SIRT6	TCCACAAACATGTTCCCGTGGA	189	209	279	376	45	44	128	1	251
	MECP2	TTCACCACTTCCTTGACCTCGA	192	220	265	384	280	75	243	452	266
	NSUN5	TCAAAGGCAAAGATCTTCCCTT	199	224	254	558	230	222	58	363	739
	PARP3	TTGTTCTCGATGTTGGTCTGGT	209	234	234	219	115	13	526	399	54
	FOXO3	TAGAATTGGTGCGTGAACGGAA	239	224	214	120	494	621	265	1106	223
	DDX56	TGTAACTTAAGGGTAACCGGGT	162	194	322	370	214	356	284	559	370
	HIST3H2BB	TTAGAACCCTTCTTGGGCGCAG	192	238	248	178	525	512	361	1	742
	SETD7	TAAAAGGTGAACACACCTCCAT	232	198	248	141	258	428	545	21	158
	IGHMBP2	TATTTCACTGGCAGGACTGGGA	145	198	336	271	109	372	287	580	251
	BRPF1	TACAGCAAACAGCATCCTCGTC	172	231	276	759	366	338	306	45	413
	INO80E	TTTTGTAGTCCACTTCGCCGTC	192	216	271	602	160	559	1097	461	577
	DPF1	TACGTGTAAATCTGTCCCGGGG	202	238	239	785	525	434	600	515	398
	ZSCAN20	TTTGACAGCATCTTCATTGGCC	202	275	202	537	299	294	644	9	481
	CAMK4	TTTCTGACCAAGTCCTTGGCAT	209	202	268	641	443	353	335	84	1301
	DNMT3B	TTTGAGAGATCGTTGCATGGGC	209	245	225	519	344	347	45	583	258
	CSTL1	TTGCTCATGAGCTTCTGCTGGA	209	245	225	183	179	244	185	416	445
	PRMT2	TGATGATGTCAGCAAAGCCGTT	212	191	276	397	344	419	125	271	147
	PPP5C	TCATGTTGTCTGTCTCGTGGTT	229	213	237	1058	150	487	418	185	269
	HIST1H2BM	TGTACACATACACAGAGTAGCT	263	165	251	391	147	453	185	1	172
	POLE3	TACAAGAAGAGGAAGCCTGGGG	232	220	228	256	144	294	472	565	380
	ZNF541	TATCCTGTGTCTCTGAGCTGAT	283	220	177	412	433	603	182	220	359
	UHRF2	TTTAAGTGCAAAACCACACCAC	155	264	262	258	455	216	485	119	180
	UBR4	TTGAGCTGCATAGTTCTGCCGA	185	242	254	285	401	57	42	185	688
	TNRC18	TTCTCGACCACATTCTCGGGAG	209	224	248	274	185	609	357	411	269
	DHX35	TCGATCACATACACAATGCCGC	209	267	205	595	350	175	271	381	477
	ATOH1	TAACTTGCCTCATCCGAGTCAC	239	183	259	467	579	1027	415	1	255
	HR	TTGTTCACTTCCTCGCTGGGTT	152	271	259	391	287	731	211	318	359
	ASCL2	TGGAAAACTCCAGATAGTGGGG	158	202	322	480	315	1083	772	1361	649
	FTSJ3	TTCTTGGCCACATATCGCCGAA	189	256	237	154	424	319	141	229	459
	MBD3	TTGCTCATCAGCATCTTGCCCG	192	253	237	167	128	344	297	1	115
	ACTL6B	TCGATGTGGAAGATCTTCCCTT	199	224	259	107	249	369	839	310	373
	SAP30L	TTGCACATGCAACTGTCCTGAA	202	249	231	600	252	625	338	113	276
	ATOH1	TTCACCTGTTTGCTGGAAGGGG	216	249	217	631	401	362	386	197	230
	CBX7	TGGAAGCACTGAATTGACCGTG	172	183	328	454	411	1342	418	1887	599
	RPA3	TTATGGTCCAAGACTGCGGCTG	172	209	302	248	621	353	1043	348	276
	HIST1H2AJ	TTATGCGCTTTTCAACTCGGTC	185	216	282	550	70	600	708	54	36
	PRM2	TTCACTCAGATCTTGTGGGCTT	199	253	231	436	239	437	230	749	495
	WBSCR22	TTTGCTTTGGCACTGTTAGGGT	202	264	217	71	468	331	291	491	620
	WHSC1	TAGACACAAGAGCTGCTTCGAC	205	224	254	66	137	250	182	390	391
	DDX23	TACACAGTCAAGTCTGTGCCAA	239	242	202	266	210	300	434	307	61
	RAD54L	TCAACAACCACATGGACAGGGA	242	176	265	397	433	509	377	3	255
	MBD4	TTGCTTTTGCTGCTTTTCTGGC	185	271	228	384	382	462	240	173	276
	DDX59	TGTAGCTACAGCATCAACGGGA	219	194	271	381	389	281	383	1	97
	DDX39B	TCAACTTCGTCTCATCATCCAC	226	216	242	415	296	141	813	158	147
	UIMC1	TTTCAGAGGAACTTAGCTGGGT	135	333	217	412	296	568	51	140	187
	ZAR1	TACCGCACAAATCTTGACGGTG	172	231	282	258	265	409	504	179	932
	PHF20	TTCTTTATCAGGCTGCTTGGGT	202	249	234	425	147	294	185	301	172
	KIF22	TAGAGTTTTCCCTCTCGCTGGC	216	227	242	209	455	356	262	479	165
	NCOA6	TAACTGAATTTCCAGCTCCCAT	232	245	208	225	668	194	494	99	370
	ZNF451	TAGGCTCTTCATCATCACTGCT	279	187	219	290	268	675	475	253	266
	TRIM28	TTGAATTGCTTGAACATGCGGC	172	249	265	251	408	166	310	553	198
	HIST1H2AK	TTTTCTTAGGCAGCAGCACGGC	179	245	262	454	519	490	1	318	441
	INTS12	TCATTTGTCTGGTACATCGGGC	182	202	302	769	1219	284	632	393	463
	HIST1H2BN	TTTGTCACTGCCTTCTTGGAGC	189	238	259	92	331	428	259	3	112
	DHX37	TTTAAGCAGCACACCATCCGTC	192	209	285	597	382	135	778	574	495
	CENPA	TCTGAAAAGCTACACATCCGTT	199	245	242	696	490	796	810	253	506
	MYBL2	TTAACAGGTGTGCTCTTGGGCG	205	213	268	699	236	1161	1240	149	305
	RUNX1	TGATTTTGATGGCTCTGTGGTA	222	165	299	595	230	728	545	327	244
	APOBEC3H	TTCAAAGTAGCCTCTCGTGGGC	232	249	205	1066	338	890	179	1103	194
	KANSL1	TTTCGAGTCAGCATCAACTGGC	172	264	251	417	204	322	297	408	147
	HIST1H1A	TGTTGAGCTTGAAGGAACCCGA	202	194	291	282	443	122	730	39	857
	HDGFL1	TTAACTTGGCAAACACCAGGTC	219	220	248	506	303	116	240	122	520
	ASXL3	TTACACATCTGCATTTCCGGTT	279	220	188	76	299	490	310	280	97
	DDX41	TTTGAGGTCCATCAGCACTGAC	179	253	256	443	468	671	651	69	430
	RPA1	TTTACTGACAGGATCATGCGGT	185	264	239	115	125	10	77	18	72
	APOBEC3H	TTTCAAAGTAGCCTCTCGTGGG	192	242	254	376	226	475	545	384	348
	DHX8	TATCTCTGTCTCGATCTCGGTT	199	264	225	102	490	219	134	345	241
	ADAR	TTGATTTGCATCCTCTCTCGCT	202	238	248	243	182	210	510	9	459
	TERF1	TTTAACATGACACTTGTCCGGT	209	205	274	514	226	309	2072	1379	129
	CTCF	TAACTGCACAAACTGCACTGAA	236	161	291	305	290	97	555	30	377
	SBNO1	TAGCCTTTCTTCTCTTGCCGGC	269	191	228	305	401	834	380	999	413
	CDCA7L	TTCGGTGATATCCTCCACTGGC	121	414	154	193	299	194	459	3	147
	CENPB	TGGAAAGAAAACCAAGGGCCAA	179	205	305	441	392	728	663	366	667
	INO80B	TAACCCTCCTGATAGGTCCCGA	179	231	279	86	74	790	45	63	215
	TAF1L	TTACTCTTCCAGAAAAGGCGGT	209	224	256	357	32	338	176	342	129
	HIST2H2AC	TCTAAAAAGAGCCTTTGGTCTT	246	249	194	529	366	403	424	217	810
	HIST1H4H	TAAGGCCAGAAATTCGCTTGAC	256	202	231	472	471	110	36	161	319
	CHMP2B	TAGTAGACATTGCTCCAGCCAT	259	191	239	144	334	434	354	904	724
	UBR4	TTAACAAGCACCAAGCACCCAG	192	242	256	248	185	353	329	1005	280
	HIST1H4G	TTATCGCTCAGTACCTTGCGAT	222	220	248	230	284	759	271	627	438
	DPF1	TCACAGTCGATCTTGTACTCGC	252	213	225	230	144	163	373	681	126
	RBBP5	TTTATGACCATCTCGGCTCCAG	199	238	254	774	516	731	791	785	284
	LRWD1	TTCCACTTCACACACCCTCCTC	212	271	208	436	341	777	262	324	445
	L3MBTL1	TTGTTGTGAGTGACTGCCTGGG	236	224	231	417	513	456	424	708	477
	TADA2A	TTGATTGGCTACATCCTGCCAA	182	194	316	545	417	506	574	295	337
	CENPT	TTGTAGTTCTCGCACTATCGCA	189	224	279	756	773	718	596	503	362
	EIF4A1	TTGATGAAGATGACTGCCTGGG	209	224	259	344	328	615	332	1578	574
	CBX8	TTCACGAGGTATTCCATGCGTC	172	267	254	485	182	612	176	339	373
	NEK6	TTCCATACTGTCCTCTCCGGGA	175	264	254	243	465	135	412	354	248
	DDX39A	TTGAGTTTGACGTAGTACTGCT	179	249	265	480	354	194	281	110	377
	CENPM	AAATGGAGATGTAACACGCCAG	219	220	254	256	697	359	421	752	101
	SCML4	TCTGAGTACATAACCTGCCCAT	239	249	205	524	707	319	408	188	355
	ADPRHL2	TCATCTGTGTAGTACAAGGCTT	252	176	265	97	233	160	173	627	269
	ERCC2	TCATCCAGGTTGTAGATGCCAG	168	224	302	743	290	547	93	48	1452
	CREBBP	TTTGTGAACTTGTCTCACCCAC	199	227	268	248	446	409	227	48	301
	REC8	TCAAACTTGAGACTTCTGGGTT	202	213	279	175	529	740	638	220	674
	DDX54	TTTGGCGAGATTGATCTTGCGG	212	245	237	618	411	313	377	318	291
	PRKCB	TTGGTCGTCTTTTCTTCCGGGA	222	238	234	285	109	150	211	217	230
	ASXL1	TTGGTGTCATTGGAGCATCCGA	222	289	183	540	131	50	373	301	387
	ASH1L	TCGTTCTAGACATTGCACCCAT	226	220	248	243	535	228	443	164	362
	PHF15	TTTAGGAAAGCTCACAGTGGGC	236	202	256	514	538	181	443	835	1000
	C20orf20	TATTGCTTGCTAATCCGAGGTT	263	220	211	709	522	79	131	898	1090
	HDAC7	TTGGTAGAAGGTTTGCTGGGTG	192	264	239	582	703	465	628	529	577
	USP21	TTGGTGAGCTTTGTACATGGGG	205	216	274	498	188	422	753	657	423
	RCBTB1	TTGCTGTAGAACCTGATCCCAC	252	202	242	662	618	456	619	470	237
	MLH3	TACATCAACAGCAACCTCTGGA	252	216	228	423	293	241	268	9	83
	PIAS3	TAGGCATCTGTGAAGGTCTGTC	383	165	148	183	287	100	412	327	434
	SMYD3	TTCAACAAAGACACACGCCGTA	165	253	279	118	459	244	115	12	355
	NBN	TGAAACATCACTACACACCGAT	219	165	313	480	891	350	960	146	158
	SP140	TCTACGTTCTGGATCTCTGCGA	222	216	259	126	217	328	220	229	97
	BRE	TTTAAATCGGTCACAGTTGGGC	236	256	205	126	233	444	233	1269	359
	SUZ12	TACTCAACCACAGTGCTCGGAG	236	220	242	683	449	97	316	556	592
	HIST1H2BL	TTTGGGTTGGACAAGAGCTTGA	175	242	282	376	490	266	638	143	602
	ZMYM2	TTCGAGATGTCTGACAACCCTG	175	330	194	462	334	462	969	812	284
	DDX31	TTGTAGAGCTAGCTCTCTCGTT	202	249	248	587	443	331	609	164	387
	HIST4H4	TTGGAGTCTGTAGAGAAGCTGT	216	238	245	355	160	228	150	354	226
	SENP7	TTGAACATGGACATCCTCTGGT	226	234	239	305	624	678	125	556	531
	PARP15	TTGCACTTTAAGCATCCACCTG	226	245	228	592	369	325	233	1222	434
	DDX60L	TAAGCATCCAGAAAACTCCGTT	226	245	228	191	462	1102	600	1186	348
	CBL	TTGCTCTGTACAAACACAGGGA	229	242	228	824	366	353	565	841	219
	UBA7	TAGATGTGCTCTGTGGTGGGAT	256	238	205	295	430	191	348	3	194
	EHMT1	TTTGACTCGGAGATCCAGGGAG	195	249	256	514	576	347	635	21	409
	RING1	TCACTTTGGATCCTTGGTGGGA	226	209	265	506	678	684	179	639	276
	RNF17	TTCTTCTGGAACAACCGCCGAG	155	264	282	464	633	540	507	226	423
	NEK6	TAAGAACTAAACTGAACCCGGT	165	231	305	498	732	381	392	1	427
	STAT5B	TTGACTTGAAAAACCAGCTCAT	182	234	285	709	513	824	772	544	466
	HDAC4	TTTTAGAGCAGTGACCACTGGC	209	238	254	240	821	191	463	345	201
	TBL1X	TTAGACTAAGTGACATGCGGGC	226	227	248	225	55	228	498	1	473
	KDM6A	TTCACCATTAGGACCTGCCGAA	199	264	239	563	137	250	351	642	255
	UBA7	TGTGTCTCCAATCTCCAGGGAC	202	249	251	230	261	266	230	1367	176
	MUL1	TATAACAGCATAAGGCACGCAT	249	205	248	451	233	244	90	9	251
	EID1	TTATTTTGCTGAACCTAGCCTT	165	264	274	225	443	250	99	330	531
	METTL11B	TTTCTTTCAGGCCATCTCGGCA	189	260	254	595	443	366	87	81	473
	UBE4A	TTTAGTTCTGTGTTTGGCCGGA	226	238	239	509	745	372	689	1	122
	PARP12	TTCTGCTTCTGCATCTGTCCTT	185	231	288	472	668	749	893	803	921
	RUVBL2	TGTTACATCACGGATCTCCGGG	189	227	288	610	449	537	319	850	957
	SUPT16H	TACAGTCTCTTCACTCGCCGAT	219	220	265	540	866	528	259	1	430
	DDX60	TAACATGTCCATGACTCTGGGT	236	209	259	449	497	665	367	1156	545
	NEK9	TACTCCTTGACAGAGCTCTGGA	195	242	268	569	277	965	574	934	344
	SENP2	TTGTGTGGGTTGAACAGTCCAA	202	238	265	175	252	306	469	223	158
	PNMT	TGCCACTTCAAAGAACAGGGAA	242	161	302	613	309	259	335	110	294
	ARIH2	TAGGTCAAGCAAGTGAACTGGT	242	209	254	503	557	244	262	1	122
	HIST1H3F	TAGCTTGCGAATCAGTAGCTCA	252	216	237	245	290	450	402	1177	133
	HIST2H2AC	TGGCTTTCGGTTTTCTTTGGTA	266	194	245	574	134	394	367	975	452
	KDM3A	TCAGACACAAAACACAACCCAA	216	242	248	227	150	188	58	155	287
	PRDM12	TTGTAGAAGATGCTGGTGCCGA	222	256	228	806	258	606	329	506	280
	MBD6	TACAGTGGAAGAGAGGAGGGTC	226	198	282	522	360	1458	55	369	291
	ALKBH8	TTTTGCTCCAAGGTGAATCGTC	226	224	256	404	287	528	447	333	413
	SUPV3L1	TTGCAGACAAAATACTGCCCAT	226	224	256	188	570	425	23	217	255
	HDAC1	TCTGTTTTGACTCTCTTGGCTT	249	183	274	146	366	921	603	232	438
	PHC2	TTGAAGTAACCCAACTCAGGTT	249	220	237	910	579	269	230	538	112
	RB1	TTGCAGTAGAATTTACACGCGT	259	213	234	1397	862	300	246	954	155
	PHF2	TTGCTCTCGAATTTCCAGCCTC	179	300	228	694	691	812	377	907	1212
	EYA2	TTATCCATCACAAAGCACCCAT	195	253	259	245	354	72	252	390	280
	MGEA5	TCTTGCATGGACATCTCTGGGG	242	231	234	423	354	600	533	425	370
	RBBP5	TTTAGGACCAAAATCTTGCCTT	175	242	291	553	398	587	405	720	309
	UBE2C	TATACAAGGGCTCAACCGAGGC	199	253	256	602	303	206	412	12	405
	HDAC8	TCCTATTCTTGAGATCGCCGGA	202	227	279	428	156	94	87	515	337
	SUMO2	TCTCAGTCTTGACTCCTTCCTT	232	242	234	60	471	515	326	84	420
	NAT10	TTGAGTGAGTTCATGGTCCGTA	189	289	231	673	366	506	574	312	208
	RSF1	TTGGACTCAATCTTTGTGCGTC	202	245	262	871	535	846	294	318	101
	GLYR1	TTCACGGTACTAGACTCCGGGA	205	256	248	196	401	50	447	1635	122
	DHX38	TCGATAACAAACATGATGCCGT	216	234	259	248	401	734	163	312	276
	SMYD5	TCGATGTCCTTGTATAGCTGGT	226	227	256	298	293	459	240	51	291
	NAP1L3	TTAGGAACCACTCTTGGCTGGA	229	249	231	863	847	653	96	699	484
	MPHOSPH8	TTCCTTGTCAGAATCATGCCTT	189	330	191	269	427	494	287	1	158
	INMT	TTGGTGACAGAGTAGCTCTGGG	232	216	262	425	411	384	590	9	276
	KLHDC3	TTCCAGGTAAAGGACACAGGAT	165	315	231	480	742	256	396	981	301
	CXXC4	TACACTGTTTTCCAAAACCGTT	205	224	282	292	363	615	443	253	778
	HIST1H1D	TTGCTGGCTTCTTTACCTTCTT	229	260	222	285	494	372	297	286	223
	DTX3L	TTTGATTTCTGCACACACTGGC	232	242	237	428	773	291	482	173	663
	DDX39A	TCTCTAGCTTCTCAACAGTGGC	246	220	245	691	137	297	386	844	520
	GTF3C5	TTTCGTTTTCACTGCCGTCGGA	168	245	299	509	401	150	386	957	183
	HIST1H2AH	TTTCCAGTTTTCACAACCTCGC	199	282	231	467	478	768	262	491	699
	CHMP6	TCTTCAATGGACATCACCTGGT	252	238	222	206	551	157	380	21	355
	H2AFY	TTCTTGTTGTCTCTCGCTGCAT	142	297	274	897	315	425	322	749	746
	RAG1	TTACAGTTGGTCTCCACAGGGT	189	245	279	238	726	259	357	1	391
	FOXA2	TGGTCATTTACAACAGACCCTT	152	260	302	253	554	185	730	464	76
	DDX39B	TTGACATCCTTCTTGGCAGGGG	179	227	308	107	220	384	319	342	183
	BRD8	TTGACCGTCATTTCTGGTGCAG	189	249	276	342	627	288	590	66	183
	HUWE1	TTGCATTCTTCTGTCCAGCGGG	189	271	254	384	478	172	545	194	305
	SMNDC1	TCTATCTCCTCAATCTCCGCTT	202	264	248	589	312	397	278	102	140
	TFPT	TGACACAAACTCCACTTCCGTC	212	169	333	295	322	303	160	173	323
	HIST2H4A	TGTTGTCTCTCAAGACCTTGCG	226	183	305	686	1066	362	702	981	341
	HIST1H2BB	TAGTGTACTTGGTAACTGCCTT	226	209	279	128	411	509	255	449	90
	C14orf93	TTAGAGAGTACAAGATCCCGCT	229	194	291	472	188	369	176	1	230
	HIST3H3	TTTGGCATGGATGACACACAGG	155	264	296	527	160	378	536	562	212
	SFMBT1	TTCTACACTGGAGACACCTGGA	202	234	279	412	284	671	357	461	1029
	PAXIP1	TTGTAGGAAACTTCCTTCGCTT	205	271	239	256	945	256	781	589	463
	TNKS	TTATAGGACAAGAAGCACCGCA	212	227	276	522	411	247	102	182	309
	HIST1H2AG	TCGATTTTACTTGAGCTGCCAC	212	238	265	1001	723	646	316	951	409
	SUMO4	TTTGTCTGTTCCACTGATTGGT	219	231	265	563	322	590	679	235	316
	PARP10	TCATTCTCCAGGTACAACTCCA	239	220	256	610	268	431	243	939	463
	HMGA1	TTCCCTTCTCTAAGGAGCAGGT	179	275	262	1011	296	75	399	229	384
	CDC34	TCAAACAAACCAAAGCAGGGAA	209	242	265	928	1286	600	708	651	309
	FTSJ3	TTACTGTCAACCTTGTCAGGGG	216	238	262	350	436	762	377	286	638
	DDX60	TTTCTGTGACAACAGCACTGGA	199	227	291	264	497	125	1	488	456
	USP21	TCAGTTGGTAGAACAGCACGTA	202	253	262	193	354	269	447	387	653
	EHMT2	TGATGTTGCCATAGTAACGGGC	212	158	347	154	678	809	201	75	355
	HIST1H2AJ	TTTACTTAGTCTTGTGGTGGCT	216	245	256	188	726	987	36	9	248
	RAD54L	TTGGTTAGCTGACTCAAAGGTT	216	267	234	118	529	235	306	529	509
	DDB1	TAGAAAGAGGGACACAAGCGAA	242	216	259	912	541	724	482	295	237
	SENP6	TAGCACAGCAACATTAACGGGA	256	176	285	389	538	494	284	446	1215
	ZBED5	TCTAGTTGCAGTGAAAACCCAT	182	271	265	342	567	774	297	880	463
	SMARCAD1	TTCAAGAGAAGCAAAAGCCGGG	192	227	299	423	430	284	440	607	398
	STAG1	TTTTCTTGCAGCTCTTTGCGTT	192	278	248	514	357	359	450	298	362
	TAF3	TTTGGGAGTAGTACACTCCGGG	205	271	242	238	223	696	533	179	445
	PARP4	TTCACTTGCATCTTCAGAGGTT	219	271	228	467	67	175	383	66	230
	SETMAR	TTGACACAAATGCATCCGGGAA	219	282	217	480	430	484	204	191	448
	TAF10	TTAGAGTGTACTTGCGGTCCTT	222	242	254	178	223	400	112	437	237
	SETD2	TTTTAGGGAACACACATGCCAA	209	242	268	774	802	650	491	1017	327
	ERCC2	TATCGAGCAAGGAAGTATGGGC	212	253	254	417	357	169	99	705	531
	DNMT3B	TTTGTCTGCAGAGACCTCGGAG	199	267	254	998	299	191	491	1	104
	WBSCR27	TAGAAATGGAGCTTTTGGGCCA	216	242	262	389	834	409	539	87	524
	NOC2L	TAAGCCTTGATGTCCACACGAA	219	205	296	386	595	294	510	434	294
	JMJD4	TCGACAGACACATATGAAGCAC	229	220	271	602	497	559	294	541	441
	MCRS1	TATCCTTGGTTGCTCTGCCCAG	236	256	228	647	443	440	606	292	588
	BOP1	TTGGTGGAAAGATCCAGGTCAA	239	213	268	209	290	338	590	455	190
	PHF21B	TACAGCACAGTTTCTCCCGGAG	229	213	279	261	560	409	112	250	248
	SCML4	TAGTTTGTGATGTTGGCGGGAT	242	191	288	204	548	185	428	200	104
	RAG2	TTGCTGTGCTTAATGTCTGGGG	179	264	279	451	509	200	549	122	76
	SETD1A	TTGCTCATTTACACTGCGCGAG	202	286	234	683	156	518	590	800	473
	JHDM1D	TTGTCTGTTGAAGATGTCTGGT	216	267	239	404	328	238	259	589	43
	UBE2I	TACAAGGTTCACGTCCTTCGTT	219	264	239	386	449	85	399	271	137
	DDX20	TACTACTTGCCAACACAGGGAC	226	231	265	464	516	612	153	6	380
	BAHCC1	TTAGAGGACAGGAACTTTGCTT	249	231	242	399	1321	107	268	244	588
	UHRF1	TAGTTGAGCATGACCACCTGGC	199	205	319	243	319	219	214	1	90
	KIAA2026	TTGAGGTACATGCAGTTCCCTT	212	220	291	243	494	1236	530	571	599
	HCFC1	TTGTGCACTGTGATGATAGGGC	219	256	248	204	446	587	48	342	409
	HIST1H3C	TTTAGTAGCAAGCTGCTTGCGC	226	209	288	391	277	150	380	244	76
	RASD2	TCTGTGTGTACATCTGTGTGTA	276	202	245	407	169	97	150	12	355
	HOXC11	TAGCGGATCTTTTCACATGGGC	246	256	222	605	369	840	1645	170	226
	HIST1H4D	TCGCGGATTACATTTTCCAGGA	175	282	268	339	163	231	501	339	545
	HDGFL1	TTGTTCTCGATTTCCCACAGCC	192	242	291	441	401	868	233	259	384
	SMARCD2	TCTTCTGGTCGTTAGGGTCGAC	195	245	285	488	398	338	332	33	151
	VRK1	TCTTTCTGGTTCTTGAACGGGT	226	231	268	300	239	653	345	21	319
	DDX1	TTTGACAATGTAACCATCCGGT	252	271	202	725	350	103	635	146	61
	ZGPAT	TACAGGTAAAGCACACGGACAC	256	176	293	334	217	537	568	146	151
	MBD5	TTGTGGTGGAACATTGCTCGTG	179	234	313	462	847	456	545	916	567
	CBX2	TGTTATGTTTGGAGGACCAGCC	205	205	316	303	325	522	217	1079	387
	DHX8	TTGATCTCCCACTTCTCTGGGT	222	216	288	819	274	244	593	1052	524
	BRIP1	TTTGGTAGAACCAACAACCCAT	192	293	242	415	369	659	1001	357	147
	ZHX2	TTGTGTGCTGAAGTCTACTGTT	222	260	245	503	306	675	396	42	373
	HMGN1	TTGGTCAGCTGTTACATACGGC	246	227	254	389	252	247	354	247	316
	MCRS1	TTGATGACACCTTGTTTCCGGG	249	224	254	506	433	459	456	235	556
	PADI6	TTGTACAGCACAGTCTCTGGAA	195	242	291	344	217	453	338	21	97
	METTL11B	TGACTTGGCTTGTTAAAGCGTA	189	227	313	475	796	185	1014	116	201
	HR	TGGTATGTCCTGAAGTCCCGGG	202	256	271	146	452	316	392	363	194
	CHD5	TTGTAGTTGACCTGCTTGCGGA	212	249	268	45	67	191	271	1	208
	CHMP2A	TTGTGGTAAAAGATCCTGGGCA	222	253	254	261	379	372	208	607	241
	MCM2	TACTTCTTCAGGACCTCCTGGG	229	249	251	300	481	313	166	155	201
	APOBEC3C	TAGGAGACAGTATGTCGTCGCA	242	242	245	47	389	356	345	131	94
	BRD4	TTGATGTCCAAGCTGAGCTGCC	189	256	285	8	134	481	437	283	244
	SMARCA5	TTTTGGTAACAGCTACTCCGTT	212	256	262	566	662	400	55	1055	190
	METTL7B	TAGAACTGAAAGTTGGCTCCGG	236	198	296	217	303	169	96	324	445
	MIER2	TAGTAGTACTCGACACACTCGC	239	220	271	180	742	412	115	194	327
	DDX31	TTTTATATGATCCACCAGGCGT	189	260	282	298	818	475	749	119	380
	MYC	TTTAGCTCGTTCCTCCTCTGGC	205	227	299	488	398	288	211	369	51
	SUPT7L	TAGTGATCTAAGACCGCCGGAA	283	194	254	373	1057	1308	351	696	219
	FBXO10	TTTTGCATGATGCATTCTCGGT	205	253	274	337	274	381	303	925	155
	FKBP1A	TGTCATTCCAGTTTTAGAAGCT	222	202	308	63	347	191	326	15	319
	H1F0	TCCTAGGACACAATCCATCGAT	226	198	308	488	513	278	1049	116	939
	MCM5	TGTATTTGAAGGTGAAGCCCGT	249	209	274	292	195	147	42	229	201
	MTR	TTCTGCACTATCTGCAACCCTC	182	300	251	261	366	247	338	247	176
	RAI1	TTGAGTGTTCTCTCAAGCGGCA	199	260	274	337	614	297	303	45	448
	EZH1	TTGTCATAGACCTTTCCGCGTC	212	242	279	410	672	472	1024	461	330
	METTL21D	TCTGTGAACACAATCTTCCCAT	266	213	254	183	799	518	571	158	427
	UCHL5	TAAATGGACATCCTGGTGGGTA	269	216	248	113	354	568	867	993	190
	CHMP1A	TCTAGGAGAAAGGTGAATGGGC	283	242	208	516	392	372	367	619	219
	SOX15	TCCAACAGGAGAAAGGGTTGAC	175	234	325	412	525	378	236	203	215
	ASH2L	TTCAAGTTTGCTTGCTTCCGGA	202	267	265	660	328	400	440	286	366
	RPP25	TAAGCAGCAATTATCGCACGAA	212	220	302	675	274	16	259	3	327
	ALKBH2	TCATTAGTAAGCTCCCGTGGGC	216	242	276	548	242	306	396	687	284
	DDX51	TGCATCTCTAATCAGCTGCCAG	219	253	262	592	649	490	845	821	230
	CHD1L	TTATGCAACTAGCAAGCTGGGG	226	220	288	264	465	840	249	63	269
	PRMT10	TAACTTGTCTGATTTTGGCCTT	229	209	296	274	789	724	252	589	495
	STAG3	TAGCTTTGCATCCAACACCCAA	269	194	271	707	465	749	912	877	258
	HIST4H4	TACTCAGCAGAAAATCGGGCTG	202	234	299	490	214	469	396	520	395
	HIST2H2AB	TGAGTATGGTGTCAAGCCTCTT	212	198	325	217	245	194	443	589	473
	RCOR3	TTAGCATTCTGAACCTGACGTT	242	256	237	615	163	253	517	307	61
	SIRT3	TATTCTGGTTTCACCTGCCCAA	195	213	328	496	382	344	243	871	205
	SUV420H1	TTTTGTTGCAACTATTTTGGCT	199	278	259	694	134	325	243	434	205
	VPS72	TTGTCGTGTATGCTCAGCTGTA	236	238	262	725	309	1392	695	669	868
	NONO	TGTCTCATTAGCATGACCTGGT	242	249	245	370	627	862	373	378	370
	HMGA1	TGAGGATGAACATTTGGCGCTG	148	227	362	227	563	353	294	705	477
	MBD1	TAATAGGTGTCTGAGCGTCCAC	195	220	322	381	354	153	287	963	334
	HDGFL1	TTTAACTTGGCAAACACCAGGT	199	282	256	1285	637	313	501	1305	373
	SRCAP	TCAACATCCACCTTAACTCGGC	263	260	214	519	182	409	609	443	466
	ACIN1	TTGGTCTGCAATAGGCATGGGA	168	282	288	472	293	359	48	907	144
	HIST1H2BB	TGATAGCCTTCTTAGAACCCTT	192	224	322	191	417	238	679	1064	233
	CDK5	TTCTCGTATTTCTGCATCGCGG	209	278	251	571	506	653	1897	482	215
	HIST2H2BF	TAAACGGAGTAGCTCTCCTTGC	226	238	274	443	322	681	322	720	305
	L3MBTL3	TCAAAGTGAAGCTTTATCCGGT	229	213	296	128	153	235	510	265	223
	MYC	TTTTGATGAAGGTCTCGTCGTC	249	224	265	386	433	247	252	301	129
	DDX17	TAGCATAACCAGCTCTATCGGT	269	198	271	282	862	668	342	832	137
	FBXW9	TTCTTCTCTTCCACCACTGGGT	202	238	299	516	430	606	240	161	155
	HIST1H2BG	TTGTATACTTGGTGACAGCCTT	222	275	242	365	780	213	800	681	860
	DDX11	TTACACAAAGGTTCTGCCGGGA	259	238	242	423	579	269	370	256	215
	MAZ	TGAAAAGACAAGACCAGGGCTG	205	216	319	352	404	366	491	170	230
	ACTL6A	TTGTGGTGACAACATGACTGAC	205	271	265	326	214	540	526	333	212
	SIN3A	TACACCAGCATTCTCCTCCGTA	276	209	256	438	357	412	185	113	86
	KDM5A	TTCTGTAACACGACTGACCCAA	158	282	302	352	252	590	246	140	208
	PCGF2	TAAAGCTTTGGGTCTGAAGGGG	182	278	282	152	299	313	262	211	155
	HIST2H4A	TCCCGAATCACATTCTCCAGGA	202	238	302	813	280	150	931	259	194
	TADA3	TTTCAACTCACTCATGGCCCAG	219	249	274	467	964	412	523	657	233
	C20orf20	TCAATATCTGAGCTGGACCGAT	226	245	271	360	602	400	83	87	703
	MUL1	TTGCAGTTTTCCACAAACTGGC	229	242	271	626	334	185	217	3	531
	SFMBT2	TTTCTTAACAGGCACTGTGGGC	232	234	276	318	535	584	510	1	176
	SCMH1	TCTGGTGATAAGCACAGTCGAT	246	245	251	477	1378	715	619	856	301
	RPS19BP1	TTTACTCTGAGGTGGTCTCGAC	249	234	259	303	459	79	319	583	147
	PRDM14	TAGAACACTTGTGAGGCCGGTG	269	191	282	269	401	241	491	877	223
	WNT5A	TTTCATTCTCTGCAGACCCGGG	179	256	308	787	532	528	749	520	577
	HIST1H3C	TTCAATGAGGAAGAAACGGGCA	185	267	291	464	850	765	491	779	266
	HIST1H1B	TTTAGGTTTTGCTGCTTTGGGC	192	289	262	436	376	400	616	375	448
	NFRKB	TCAAACTCTTCTTCACTCCGGT	212	238	293	102	586	222	791	18	126
	COQ5	TGTACCTTAACCACACACCCTA	189	227	328	798	942	887	976	143	671
	METTL7A	TAGATGTTTGGCAGCAGTCGAT	216	249	279	595	509	503	342	60	119
	GPS2	TTGGAATTGTCCATGCTCTGGT	219	260	265	394	306	575	118	372	251
	NOC2L	TTTCCAAACAGCAGCTTCTGGA	226	253	265	605	350	572	628	289	387
	HIST1H2AB	TGACAGAAAAACAGCAGTGCAT	232	187	325	324	735	185	574	194	169
	NEK9	TTAGAAGTGAGCTCTCAGCCAA	239	260	245	8	328	325	871	203	387
	ACTA1	TACAAAGAAAGTGACTGCGGGG	249	213	282	399	395	553	628	681	348
	DMAP1	TAGAATGTCCCGTACATCCGCG	263	227	254	592	408	334	36	295	94
	BRPF3	TAGCAGGTTAGTTTCCAGCGGG	283	224	237	647	258	696	233	473	552
	METTL2B	TTCGAAGAACACTTGTGCTGTT	189	348	208	941	373	69	153	54	301
	MACROD1	TTGGACTCTATTTACGGCGCTC	202	278	265	790	589	394	472	883	491
	TSPYL2	TTCATTGTCACTGTCGCTGCTG	205	275	265	899	175	494	638	289	993
	TRIM5	TTGCTTGAATCTGAGAGGTGGA	226	260	259	167	204	699	348	360	459
	LMNB2	TAAACGGTGAGCTATTGCCGAA	266	231	248	811	821	912	883	586	438
	CXXC5	TTTCCGCTTCTTCTTGCCGGAG	192	249	305	555	595	762	281	351	405
	ZAK	TTTCTTGGCATCAGCTTCCCAA	205	242	299	537	395	631	498	622	445
	CENPT	TATCTAGGCACTTCTCCACCAT	216	234	296	318	354	163	523	482	233
	CHMP2A	TGTTGGACTTGAGTGTCTGGAT	242	202	302	571	376	375	291	1106	484
	CENPW	TACATTTACTCGCACAAGCGTT	246	209	291	498	424	431	1556	740	542
	ESCO1	TACAGTACCAAGCTACACTGGT	252	198	296	264	487	356	134	378	502
	TET3	TTTTGTGAGAACCTGCTGCGAA	202	209	336	201	156	958	377	318	54
	MBD2	TAGTAGACATCGCTCTTGCCAG	229	267	251	582	487	419	102	220	359
	MACROD2	TATACCACTGGCATCTTGGGTT	229	267	251	141	716	266	957	304	473
	DAXX	TTGTCTTGCAAGTACCAGGCCG	236	297	214	647	500	818	561	595	452
	FOXP2	TAACTGCTGAATCTCAGCAGGA	246	264	237	73	487	275	431	1237	563
	C17orf96	TATGTCATCAGCCTTCTCCCGA	279	209	259	261	210	453	275	416	287
	ACTR6	TATTAGCTTAGTCTCCACCCTT	293	183	271	670	573	815	147	562	452
	MPHOSPH8	TACAGCTTGTACACTACACGGT	185	289	274	469	506	313	459	779	201
	NSMCE2	TTTTCTTCCGCTTTTGCCTGGA	189	297	262	373	230	372	437	1367	122
	NFRKB	TTTGACTGTGGTAACCTGGGAC	195	282	271	798	401	116	673	33	452
	CHMP1A	TATGTCTGTCCACATGGTGGGA	226	234	288	29	563	416	848	482	846
	AKAP1	TAACAGAGGTACATCTGCTGGT	222	256	271	243	299	210	252	1	4
	DNAJC2	TTAGCTTCTTGCTCCTTCCGTT	226	289	234	641	150	325	268	764	119
	SENP8	TAGTGAGACATCTGATTGCCGC	246	238	265	853	1015	213	498	476	76
	GTF2B	TAGTCCTCCACTAAAATCGCAT	313	191	245	493	694	628	816	57	774
	KDM5D	TAGTGTTCAATGCACTGGCGTC	226	231	293	615	735	1046	641	726	463
	LRWD1	TAAGTTAGTTAGCTGTGTCCCT	242	260	248	144	983	206	80	146	624
	ESCO2	TTCTTCTTGGAGCAGACTGGTT	209	308	234	363	389	191	494	152	112
	H2AFJ	TTTAACTCCTCGTCGTTGCGGA	212	234	305	584	859	331	440	271	47
	BUB3	TTCTGCATCTGTCACTTGGCGA	236	264	251	566	207	241	402	354	97
	ZMYM3	TTCTGGCATATGCTGCAGCGAG	165	322	265	532	668	553	55	758	323
	PARP1	TTTGTTGCTACCGATCACCGTA	219	245	288	615	309	447	737	342	574
	DDX49	TTGTGGTTGATGACCACCTGTA	246	213	293	425	719	444	899	925	660
	SIN3B	TTGGGTGTCTTATCCAGAGCGG	249	238	265	615	214	197	166	809	366
	JMJD4	TAGTCATCCACATCCAGTGCAT	263	275	214	1027	233	559	533	295	237
	ZGPAT	TGACTGTGTAGTAGCCGTTGTC	179	249	325	191	478	344	217	295	387
	BOP1	TGAGAACACACTCTCCTCGCTG	189	231	333	475	312	338	367	18	18
	KDM1B	TTGAGTTGAATGTCAAGCCCTT	212	253	288	545	602	606	287	149	495
	GON4L	TTTGGTGATTCTCACTGCCCGG	236	249	268	258	226	597	357	815	276
	KNTC1	TTGAGAATGCACAATTACCGGT	249	216	288	459	315	450	220	200	301
	HJURP	TATATCTGTGCCTCCTCCTGGA	310	209	234	621	220	356	303	482	104
	KDM1B	TTCTTCTCTGACAACGGTGGAT	172	286	296	344	576	472	389	315	814
	HIST1H3I	TAATAGTGACGCGTTTGGCGTG	216	245	293	462	207	609	287	301	230
	DDX11	TTTACACAAAGGTTCTGCCGGG	219	253	282	344	411	478	491	832	825
	SUV420H2	TCACAGTGCTCATTCTTCTCGC	232	234	288	230	328	203	246	277	129
	FKBP2	TATTTTGAGCAGCTCCACCTCG	239	224	291	60	357	444	504	1	40
	RECQL4	TATTTTCTCCAGAAGCGTCGGT	192	275	288	8	379	306	310	134	527
	KDM5B	TTTCTCAACAAGCTCTGTGGGG	209	267	279	238	201	681	227	262	165
	RPS19BP1	TTCAGGTTTACTCTGAGGTGGT	219	308	228	634	134	347	367	51	294
	C14orf43	TTTGTTACTTCCACAGCTGGGG	222	282	251	199	255	247	348	699	366
	TDRD9	TTTCTCGTCGTCTTTCATGGGA	232	278	245	167	280	731	727	113	140
	PADI1	TTTGCCTGGTGTTTTAACCCAT	232	289	234	430	465	406	784	298	531
	SETDB1	TATCAGGTCACCATCTTTGCTT	256	220	279	329	220	600	16	21	248
	CHMP5	TTCTGCTCTACTGTCCACCGTG	199	278	279	271	443	384	217	529	119
	SOX15	TCTGAACTGTAGTCCAACAGGA	269	191	296	206	389	453	310	6	395
	CXXC5	TTCGATTCCTACAACTGCTGCA	142	373	242	305	299	440	335	265	219
	HIST1H2BL	TTAGAAGAGATGCCGGTGTCGG	185	267	305	527	293	263	173	464	334
	MBD6	TTGCATTTGTGCTCTGAGTGGG	216	242	299	845	494	1214	530	235	488
	DDX39A	TTGACGAAGATTATCACCTGGT	216	242	299	258	258	97	858	3	337
	CHD5	TTTTCCTTGAGCTTCTTGGGTT	219	256	282	686	347	244	472	660	488
	KEAP1	TAACACTCCACACTGTCCAGGA	219	264	274	344	287	231	858	1	524
	APOBEC3F	TGTCTCGATACATTCGCTCCAC	219	264	274	199	258	603	501	3	15
	MGMT	TTTTCCAAGTACCAAGTCGCAA	256	267	234	701	268	303	654	333	610
	DPF2	TTTTCCACAAATGTCACAGGCA	205	297	256	271	987	762	456	583	430
	SMARCA5	TTCTAAGTGAACTTTCGCCCAT	222	289	248	167	188	472	485	419	516
	ZNF740	TTGATGAAGCTCACGATCTGTT	229	242	288	279	742	887	491	580	470
	WRN	TTTGTTGCCAGAATAGCTGGGG	232	282	245	212	583	235	189	336	323
	TFPT	TCAACCTTAATCTGCACCGGGG	252	202	305	813	433	160	370	746	495
	SUMO3	TAACAGCAAGTGACAGTCTGTC	263	238	259	162	290	60	255	669	15
	STAT5B	TTTAACACTTCCATCACACCGT	239	234	288	196	500	291	370	194	398
	BRD8	TCTGCATCTCTCTTTAGCCGTC	205	275	282	600	595	522	424	1240	567
	HIST1H2AD	TCTCGTTTTACTTGCCCTTGGC	216	264	282	589	827	422	440	669	413
	INTS12	TTGTCACAACTAACTGAGCGAC	239	304	219	527	258	428	357	381	251
	SIN3B	TGCGTGTATACACATACGCCTA	252	231	279	548	379	206	440	15	570
	BAZ2B	TTAGCAACTTTGCATCTGCGTT	209	275	279	326	608	909	504	761	180
	FOXP4	TTTGCTGTCATTGTTCCCTGGG	212	300	251	222	312	434	479	63	212
	ERCC5	TTTACAAAGACCGTGCCACCAG	219	245	299	912	344	553	517	512	688
	HMG20B	TTGTTTTGGTCCAAGAACTCTT	222	267	274	404	366	465	1320	818	481
	SMARCC2	TTCCTGTTCATCCAGGTCGGTC	222	267	274	206	334	1264	153	776	284
	SAP130	TTTGTCTCCATCATGTCACCTT	226	286	251	222	420	309	240	315	441
	USP7	TCATGTAACAAGTCGCTCCCTG	236	256	271	589	640	1258	166	651	674
	PHF2	TACAGCATCACAAAACACGGAA	273	205	285	644	500	440	520	476	477
	DDX3Y	TATCAGGAGAATCACAGCTGGT	283	249	231	548	207	487	657	1	341
	PIAS4	TCTTCTCGTTCATCTGCAGGTA	226	256	282	561	738	425	364	740	602
	MTF2	TTTCCATCAAGTGTCACCCGAC	242	260	262	230	417	834	335	262	198
	HIST1H2BG	TATACTTGGTGACAGCCTTGGT	246	227	291	199	319	319	128	734	151
	DHX32	TTCAGCTCGAATAACATCTGCC	209	319	237	14	172	437	482	119	273
	ING3	TGAACCTTCTCATCTGCATCTT	226	231	308	285	560	434	784	45	11
	MCRS1	TACTCTTCTTCACACGCTTGGT	259	238	268	793	551	213	695	81	477
	RUNX1	TCCACTGTGATTTTGATGGCTC	293	267	205	264	554	434	185	636	258
	NOC2L	TTCCATCTCTCAACCATGGCGA	158	289	319	527	579	157	236	550	258
	EYA1	TATTCACACAGTTTGTCCGGGA	209	264	293	206	509	459	287	310	344
	NSUN5	TGGATGTGTACAGTACACGCAC	222	231	313	654	494	150	581	3	420
	DDX47	TCTGCAGTAAACTCCAACCCAG	232	249	285	725	668	718	482	194	771
	CREBBP	TTTGGATTCACCAGGATCGGGC	242	256	268	545	274	422	616	627	176
	SOX15	TCGATCCTGAAAATGGAAAGGT	252	275	239	462	322	344	243	1121	97
	CBL	TTTAGTGGAAGGAACATGGCGA	195	293	279	347	312	185	195	292	72
	DAPK3	TTCTCGAAGATGTCGTGCAGGG	216	289	262	420	398	490	342	464	359
	NOP2	TGTGACAGAAGGTACAGTGGAC	236	260	271	433	13	41	265	9	36
	DIDO1	TTTTCCTGAACTCTTTGCTGGT	239	286	242	386	538	210	405	283	176
	OIP5	TTCAATGCCAACTAGGAAGGGC	246	260	262	391	570	840	593	443	190
	HJURP	TTTCAATCTCCCTCTGACGGTT	199	271	299	996	344	597	479	12	319
	STRA13	TGTTTGTCAAACACACAGGCTA	236	220	313	837	334	235	329	214	251
	COMMD3-BMI1	TGTTCTTCCCAGTAGGATTTCT	242	234	293	24	223	734	494	104	327
	ARIH2	TGACATCTTAGCATCCAGCCAA	252	209	308	209	611	191	1090	476	190
	TLE1	TTGTCGATTCCATTTTCCCGGG	259	234	276	347	503	618	625	1076	416
	HIST2H2AC	TTTCTTTGGTAACAGAACGGCC	205	249	316	743	369	444	255	197	914
	TMPO	TTGATTCTGTTCCTTGTTCCCT	252	242	276	227	554	484	463	737	413
	SUPT16H	TTCAGTTTCGGATTACTCCGGT	192	308	271	300	236	225	402	30	337
	CHD7	TTGAGGTAGAGCTTGTTGCCTC	229	260	282	279	748	281	574	1198	215
	PRDM6	TTTCTCAACGAGCTGCTTCGGA	236	253	282	485	758	231	523	934	932
	H3F3A	TTGCATGTAGGACAACTCAGTT	259	216	296	313	363	612	475	654	559
	CSNK2A1	TACAGGTCTACCATTTCAGCTT	259	293	219	417	344	250	453	220	409
	PRMT10	TAACTCACAGGCATACACGGAA	269	308	194	519	691	706	698	827	628
	LMNA	TCAGGGTGAACTTTGGTGGGAA	276	224	271	282	831	284	619	21	391
	HIST1H2BN	TTCTTGGAGCCTTTCTTCGGGG	212	286	274	1183	818	912	931	1513	581
	USF2	TTGTTGATCTTGTCCCTCCGCC	219	271	282	438	907	247	565	57	362
	PRMT1	TTATGAAACATGGAGTTGCGGT	229	278	265	8	274	387	150	87	187
	CCDC79	TCAACATTTCGGAACAACTGGG	232	238	302	185	284	481	539	613	305
	ZNF787	TCGTCATCATCCATGATGAGGA	232	249	291	42	513	659	166	384	244
	CHAF1A	TTTACACAGGAATTGAGTCGGT	263	238	271	133	503	447	233	318	499
	BMI1	TACAGGTTCACAAAACAGCGTA	266	238	268	641	309	556	322	642	183
	FBXO10	TTTGCATGATGCATTCTCGGTT	185	297	291	316	678	930	482	636	1477
	H1FOO	TGTAGAGCTTGATAGCTGCCAC	202	249	322	344	226	668	552	75	172
	SFMBT1	TTATTCTGCTCACACCACCCAA	222	286	265	34	408	132	342	598	506
	AP2A1	TTATTCAGCAACTCATCGGCTT	269	242	262	769	633	253	498	301	223
	ACTL6B	TACTGCTCGAACATCAGCTCTG	283	231	259	782	354	422	160	559	215
	SP100	TTGGACAGCAATTTGTTCGCAG	293	187	293	826	347	359	99	244	248
	SPC24	TTCGCATTGAGAAGGCTCTGGG	135	414	225	569	191	709	278	494	638
	NNMT	TTTTCTAGGTAATCCCGAGGGT	182	242	350	868	312	303	434	889	201
	KDM8	TAATGCCAGTATTTCACCGGGA	192	289	293	193	395	306	246	372	534
	GATAD2B	TTAGAAACACACATCGGAGGGC	199	293	282	316	217	203	201	45	269
	HIST1H2BN	TTCTTGCCGTCCTTCTTCTGGG	216	319	239	370	322	241	310	315	158
	DNMT1	TAGACGTCCATTCACTTCCCGG	239	256	279	389	595	222	1062	399	183
	SP140	TCTGAAGAACCTGAAAATGGGC	242	253	279	399	414	138	252	253	319
	MBD5	TTGCATTTGTTCCTCCTCCGGG	252	260	262	300	624	568	596	675	850
	BPTF	TATTGGTAGCATCACAACTGGT	259	224	291	574	436	728	440	54	294
	DCTD	TTTCTCACAATCCACTCACGGG	185	282	308	402	392	724	415	63	452
	RUVBL2	TTACATCACGGATCTCCGGGAC	185	311	279	378	560	553	765	286	241
	ECE2	TGTTGGAACTCTTAGAGTCGGC	226	227	322	451	773	515	641	134	208
	RPA3	TACCTTTCTGCGATCACAGGAT	226	267	282	438	608	724	950	862	448
	HIST1H2BB	TACGCTTCTTACCATCCTTCTT	236	297	242	920	474	631	941	642	645
	UBR4	TTGACATAGGAGCTGATCCGGA	246	264	265	172	271	141	102	262	219
	PHF21A	TGTATTTGGAACTTGTCCGGTT	199	267	310	321	401	796	201	60	287
	HIST1H3H	TGAAAAGGCAGCTTTCTGATCA	202	198	376	384	242	547	32	312	291
	SIRT7	TTCTGAAGCAGTGTCCACACTC	216	278	282	133	163	316	243	372	337
	FUS	TCTGCTTGAAGTAATCAGCCAC	252	245	279	384	675	309	424	1011	1126
	PRMT8	TCATAGCTGCTTAACATCTGGT	266	231	279	503	347	397	246	672	309
	PHRF1	TCAACTGTGAGCAACACAGGTG	283	165	328	443	595	472	1151	1064	301
	FBXO10	TTGCTCTTCGTACACACCTGGG	195	260	322	892	894	1164	625	520	810
	RPH3A	TTTGCTAGGAAGCACACAGGTG	226	260	291	1892	684	930	864	835	434
	SIAH2	TTTTAAGATAAGCACTCCGGGT	226	286	265	668	509	547	284	399	97
	HIST1H2AD	TTTTACTTGCCCTTGGCCTTGT	229	300	248	1074	446	609	227	280	413
	KIF22	TTCATTAGCACCATCCGCTCTC	236	253	288	683	630	731	574	1100	739
	NFYC	TGCAAATACACAGAGCTCTGGG	239	242	296	540	436	525	87	360	187
	FLYWCH1	TTCCTGTAGAGGAAGGACTCGT	158	344	276	8	255	553	147	630	452
	ATAT1	TATACTGGAAGAGTTCTCGCCC	242	220	316	245	436	403	23	99	384
	MAU2	TTTAACATCTTCGAACTGCGGG	256	234	288	730	672	484	259	803	212
	CDY1	TTGACTGATACAACAATAGGCT	276	231	271	235	509	540	418	15	151
	RTEL1	TTGTCATACACCCTGACGTGGG	279	245	254	248	334	334	227	476	198
	MBD3	TTCTTCTCCCAGAAGAGCTGGC	205	286	288	527	436	612	58	1	506
	STAT5B	TTTAGCAGTAGCAGACTCGCAG	205	300	274	459	773	609	593	9	1022
	KDM3A	TTTTCCTTGTTGACATTCCCGC	232	234	313	498	573	525	778	437	391
	HIST1H4I	TTCAAAATGCCATTTAGCCGCC	202	333	245	217	261	113	418	419	380
	CDK3	TGTGCCTCTATTTTGAAACGGC	212	260	308	1157	328	288	265	75	76
	HDAC3	TCGTTGACATAGCAGAAGCCAG	216	282	282	149	306	806	628	51	230
	UBE2N	TTTGGTTCCAACAATCAAGCTT	216	330	234	464	306	259	306	788	506
	METTL11B	TCTACAGAGTTCATCGTCGGTC	239	267	274	311	382	731	345	1225	466
	SAP25	TTATTGTCAACACAACCAGCCC	246	260	274	235	175	525	1103	30	205
	KAT6B	TTGTCGTTGACATGAATCCGAC	316	202	262	170	513	562	663	295	402
	ARID4B	TTTGCTGTCTTGATCTTGGCTT	219	308	254	415	350	387	1084	339	237
	TIPARP	TTGACATTGCTAGAGGGTGGTG	222	220	339	331	411	534	169	821	502
	CDYL2	TTGCAAATCACTCAATTGGGTT	242	260	279	725	408	200	96	669	151
	UIMC1	TTCTTCTGCAGAACTCTCTGGC	269	275	237	365	589	110	90	60	491
	H1F0	TTTGCTTTGGGTTTCACTGGTT	195	322	265	251	303	528	373	827	162
	FKBP1A	TCCAGTTTTAGAAGCTCCACAT	229	245	308	793	258	440	291	336	223
	CENPI	TACAGTGACAACAAAGCCTGGA	252	242	288	1123	373	475	361	122	137
	RFXANK	TTTTCATTCTGCACAGAAGGTT	266	282	234	384	401	306	600	188	1194
	STK31	TAGCAAGTGATCCACACTGGGA	269	205	308	217	459	284	472	681	276
	DDX49	TTCTTCTGCTTGATCTTGGCCA	249	297	237	548	293	412	1	72	491
	PRTFDC1	TAACAATACGCCACATACGGTT	273	205	305	652	360	662	581	895	155
	ZBTB12	TTGAGGCCTATTTTGGGCTCAA	199	275	310	266	169	334	189	562	162
	HIST1H2AI	TTCTACTTGCCCTTCGCCTTGT	216	275	293	298	920	422	1218	972	269
	EP300	TTCTGTAGTCTGGTCCTTCGTT	229	304	251	376	169	319	252	6	370
	APOBEC3F	TCGATACATTCGCTCCACTGTG	259	249	276	720	516	481	389	455	470
	RCBTB1	TTGGGTACAAGTGTACTCTGGT	269	293	222	397	322	387	326	194	284
	DHX32	TAACACATCAGTTGCAATGCTT	323	205	256	545	188	278	300	12	269
	NDC80	TTCGTCTTTCTTCAGTCGTGGT	179	344	262	206	627	565	380	503	362
	METTL2B	TTTTGATGCTGTCTACAGGGTC	226	271	288	996	427	668	1132	107	717
	HOMEZ	TAAGAACTGAAAATAGCCGGGC	256	213	316	97	509	522	322	393	101
	L3MBTL2	TTGATGTGGAAATCCACGGGAA	256	264	265	847	487	609	268	119	782
	FAM208A	TATATGAACTCGGAAAGCCGTT	276	227	282	384	541	806	950	60	488
	CDK9	TGACTTGACAATCAAGTCCCAA	249	227	310	707	309	238	530	526	273
	HIST1H2BH	TAAACGTATACGGAGTAGCTCT	249	238	299	519	684	565	224	158	255
	HIST1H1A	TTGGGCTTTACAGTTTTGGGTT	256	245	285	146	233	110	316	217	158
	MTERF	TATGCTTGAATCCAGAACCCGA	269	209	308	524	398	1065	577	170	506
	APOBEC3B	TGAGGCTTGAAATACACCTGGC	162	238	387	535	427	394	361	431	585
	HIST1H2AI	TGCAAACTAATCCAGGCTTCTA	172	253	362	399	166	737	316	717	233
	CENPQ	TCTGACAACACAACTTCCTCAT	205	289	293	397	360	338	166	283	319
	AICDA	TGCATTTTGAGTACAGACGGGG	232	256	299	686	888	522	357	434	441
	PHF17	TTGTCACAGAACACCATCTCAT	242	297	248	245	1238	777	835	666	499
	TRRAP	TTCTCATACAGGCTTCTCCGGC	242	326	219	149	185	753	319	253	506
	KDM5D	TTTACCTCATTGTCAAACGGGT	266	304	217	608	754	990	950	84	606
	CDC34	TAGTAGTCGTCGTAGAAGAGGT	303	202	282	214	144	44	262	758	122
	CDK3	TTTCTCAGGAACATACCACGTT	219	293	276	212	137	281	169	63	645
	MLL2	TGAAAATCTGCTACACACCGGG	222	264	302	673	404	309	686	449	316
	HDAC3	TTAAGACTCTTGGTGAAGCCTT	259	238	291	144	249	543	208	1	552
	BAP1	TTGGTGAAGTCCTTCATGCGAC	229	286	274	222	474	450	447	315	18
	MTA2	TTGATAGGAGCATAAGGCCGTC	226	234	330	157	446	1143	612	399	692
	IWS1	TTTCGCTGCAACATCATCTCAA	226	322	242	318	188	47	77	283	205
	CSF2RA	TTGGATGCCAATTTCTCGGCTG	239	275	276	389	328	203	957	327	58
	UBE2C	TGCTTTGAGTAGGTTTCTTGCA	232	249	310	1131	643	575	195	327	445
	SMARCD2	TTGATGGACTCAATGGTCTCAT	249	297	245	191	465	387	386	12	488
	HDAC7	TACAATGAGGATCTTGCTGGCC	263	249	279	326	328	344	291	485	556
	TRERF1	TTTAAAACTGGAACAGCTGGGC	216	231	345	555	360	753	255	443	205
	HLTF	TTGCTTAACACAGAAAGCGGAC	216	311	265	438	389	578	284	81	305
	KDM6A	TTTTCGTGCACAATCTTGGCAA	226	275	291	47	334	194	284	523	226
	SMARCD3	TCTTCTTCTGGTCTGAAGGGTC	252	278	262	347	376	522	240	411	434
	TSSK6	TGTACTTCTTGGATGTGGCCAC	249	242	302	311	331	394	125	194	230
	CHD4	TAGTTTCGGAACATCACCTGAC	266	245	282	170	233	643	491	223	83
	PARP9	TTTGTGACCAGTACCAACTGGG	195	308	291	678	392	334	507	277	434
	MAU2	TTAACATCTTCGAACTGCGGGA	222	293	279	660	296	484	960	592	871
	TDRKH	TTTGGTCTCAGTGAGCAACGTG	226	260	308	331	745	428	147	1159	337
	ALKBH3	TCCATGATTAACAAGGTCCCAT	269	286	239	459	595	185	128	455	613
	GFI1B	TAGAGTGCTAAGGACAGGGCTG	323	220	251	331	424	440	813	491	298
	BRE	TGGTATTCAAACATGAGGCGGG	205	234	356	550	430	394	214	9	595
	RNF20	TAGACTTCTTCTCAGCTGCCAT	242	297	256	806	255	269	278	812	233
	FBXL19	TTGGCTGCTATTTCCATGGCAA	252	238	305	146	964	275	294	152	513
	SIN3A	TTGAATAGCTGGGACACACGAC	259	271	265	871	548	543	342	143	169
	GTF3C5	TTAAGCGAGTTAGTCCACCGGG	179	289	328	209	417	706	102	1	165
	FAM175B	TTCCAGGATACTTCAGTCCGGC	189	311	296	610	366	662	99	975	688
	CHD4	TTGGAGACAGCAATCTTGGGAT	222	315	259	991	449	331	791	788	470
	AIRE	TTGTAGACAAGAGTCGTGTCCA	226	308	262	662	344	434	335	48	359
	ING5	TTAACTTGCTCCTCGGATCCGG	232	202	362	464	287	387	469	693	215
	APOBEC3C	TGGAAGTAGAATGTGCCTGGAT	252	202	342	532	516	481	326	238	316
	BRWD1	TATCCAACATAGGACCGATGCG	286	242	268	774	506	556	249	1323	645
	PHF5A	TAGTGGGCTATGATGATGCCTG	293	224	279	279	153	384	55	782	348
	BAP1	TGACTCTTGAGACTTGTGGGTC	185	242	370	175	175	543	77	292	645
	USP13	TTGCCTTGTAGAAATAGCCCTT	192	297	308	157	389	128	271	107	488
	SCMH1	TTGAGTCTGAGTGTGGTTCCAA	236	231	330	571	834	481	96	194	137
	TET1	TTGGTAAACTGCAACAAGCGTC	236	253	308	433	344	821	456	824	502
	MAP3K12	TTTCTGTTGATTATGTGGCGCA	242	253	302	139	529	537	185	102	499
	SAP30	TTAAGTCCTGGTCTGGTTGGTA	249	297	251	277	500	540	683	428	76
	MTF1	TTTCTCACAGCCATTACTGGGG	263	289	245	331	726	144	456	119	513
	MLL2	TTGGTCTGCTTGTTGATCTGGC	273	293	231	420	315	284	102	405	169
	RCBTB1	TTGACTTGAAGAACCACTTCTT	209	256	333	295	529	163	195	84	276
	LRWD1	TTTCAGGTTGTCATTGACCGTC	212	315	271	832	436	924	138	476	226
	KAT6B	TTGGCTTTTAGCACCATCTGGA	226	293	279	1366	385	322	676	800	108
	RECQL	TACCATTTCAGCATGAACCCAT	229	267	302	681	376	241	268	604	344
	MIER2	TTCTGTGACAGGATCTCTGCGA	212	319	268	305	207	344	440	470	445
	SENP3	TTTGAGTAGAGCAGCATCCGGA	229	245	325	394	506	107	351	589	642
	TDRD12	TTTCCTTGCAAAAACATTGGCC	242	275	282	829	684	394	842	827	387
	OGT	TTGACCATCTACCTAGTACGGT	256	267	276	373	153	225	351	607	126
	LCOR	TTATGCAGAACAAGGAACCCAA	276	238	285	558	433	316	303	393	122
	TFPT	TTCCTCTTCATCTCGCTCCCGG	172	315	313	149	716	484	90	532	233
	ESCO2	TTGGTTGCAAATAACTTGCCAT	286	238	276	488	236	100	166	541	631
	TRIM5	TTTTCCTAGAGGAACCGCAGGA	185	271	345	694	468	865	150	1	86
	CHAF1B	TTTGTTTTCATCGAGTCTGGGC	216	326	259	240	684	132	338	812	373
	SOX10	TCATCTTTCAGTGTGGGTGCAA	242	300	259	225	376	369	408	838	344
	ATOH1	TATTTGGACAGCTTCTTGTCGT	266	267	268	365	595	294	351	268	445
	METTL13	TTGCTGAGGAAGATCAGTCGAC	286	224	291	537	242	728	297	30	140
	CHD1	TTCTCCTCTTTGAACTTCCCGC	209	322	271	230	446	509	428	419	262
	METTL2A	TTTGAAGAACACTTGTGCTGTT	232	282	288	605	334	472	475	324	180
	ADPRHL2	TAGGAAGCAGTAGATGGCGGTG	350	238	214	871	649	409	284	259	115
	MYPOP	TTCTCTTCGAATGAGAAGCGCG	179	319	305	170	573	565	584	925	298
	H2AFJ	TTGAAAGCAAAGTCAAACCGAT	205	319	279	279	401	225	182	598	538
	AIRE	TCATTCTTCTGGTGGAGCTGGG	239	234	330	709	233	475	1030	1	387
	TAF9	TAAACCTTTGACCTGTGAGGGA	246	275	282	1095	366	821	463	613	387
	PRDM11	TTAAGCATGTCTAATTCTGCCT	246	315	242	566	513	356	275	122	355
	SMARCE1	TCTAGCTGTTGTGACAACTGAC	276	256	271	553	643	225	233	509	155
	PARP15	TTCATCTGCTTACACAGGCCAG	189	330	285	350	487	263	361	203	119
	FBXL19	TAAAACAAGAACAAGCCTGGGG	242	249	313	498	315	540	855	419	520
	GATAD2A	TTCCAGTTGACACATCATCCAT	249	304	251	894	401	359	612	342	244
	SENP5	TTTAGTCTAAGCCACACTGGGC	226	311	268	318	424	487	695	396	144
	MAP3K12	TTTAGGGAGCAAAGACTCCGTC	256	264	285	647	494	993	466	256	251
	SMARCB1	TCTTGTACAGAGAACCTCGGAA	266	260	279	579	312	490	941	497	294
	SAP130	TCTTGTTGTGACATCTCGTGAC	273	227	305	378	401	494	711	669	122
	HINFP	TTGGAACAGTGAGAACACTGGA	276	253	276	514	102	584	208	523	656
	H1F0	TCTGAAACTCTCACAACGGGTG	189	289	328	553	223	609	698	235	674
	CDK9	TATATACTACCCTTGCAGCGGT	222	282	302	892	424	840	453	21	409
	ZMYM6	TTTACAACCATCACACTTGGCC	252	224	330	94	1257	600	373	1023	477
	YBX2	TGAATCCGTAACCATTCCGGAC	252	238	316	855	678	303	287	312	258
	H1FOO	TTTCAGATTCAGGAGACCTGGA	269	256	282	410	274	200	326	381	133
	NSL1	TTCTGTGCAACAACAGAGCCGA	195	300	313	1	296	715	443	455	481
	RFXAP	TTTCATTCAGCTCTCACTGGGC	273	256	279	219	455	375	141	467	122
	ZFP57	TTGGGATTGTGAACAAACTGGT	279	267	262	540	506	462	338	431	348
	SF3B1	TATCTTCGTGAGTCTTGGCGAT	283	234	291	253	252	425	453	96	384
	CHMP5	TTTCATAGCATCAACCGTGGTC	293	264	251	571	484	703	399	116	309
	CXXC1	TTGTCAGTAGAGTCCGTACGGC	212	289	308	131	115	107	832	271	653
	CENPA	TTTGGGAAGAGAGTAACTCGGC	232	289	288	152	322	634	418	75	430
	CHMP3	TGATCATCTCCTTGGCCAGAAC	242	220	347	251	484	537	313	170	499
	OGT	TTATCTGCAACCATGCTGGCAA	259	220	330	931	236	587	880	850	151
	METTL7B	TTGTTCTAATTGGAGGCTGGGG	242	245	325	769	382	387	558	378	344
	HIST2H3C	TTGGATACGATGGAACCTCCGG	242	282	288	425	653	235	428	1	140
	EMG1	TGTGACATCAACAGTTTCTGGT	246	256	310	214	376	419	348	809	749
	TRIM37	TTTCATACATCGAACTTCGGCC	246	278	288	610	363	378	233	24	90
	AKAP8	TAAAGTTGGAACTGCTTCCGTT	263	224	325	196	414	462	957	292	248
	HAT1	TTCACAAGCACAAAGTCTCGTA	205	366	242	472	525	440	211	3	180
	DPF2	TTGAACCCTGTGATCACCAGGG	226	282	305	548	210	459	345	449	144
	KIF22	TTTGCTTCGTCTTAAGCCTCTC	226	322	265	777	560	690	469	265	323
	KDM6B	TCTCTCTAAGGTCACTTCCGGG	232	245	336	602	786	606	354	907	1466
	ZCWPW1	TGATTGGGTAGATACTACGGGC	232	245	336	133	385	313	157	155	384
	HIST2H3C	TTTTGGATACGATGGAACCTCC	239	275	299	256	408	391	326	419	337
	CHMP2A	TCTCTAGTTTCTGTCGCTCGCG	269	293	251	462	344	297	628	1495	355
	RBBP7	TTAGCATCCACAATTTTGCCTT	269	319	225	454	843	790	581	72	463
	PCMT1	TCATACTGCTCCAACATTTGGT	279	224	310	240	214	175	182	3	94
	ING5	TTAACATACAAAACCCACCCAT	326	245	242	631	525	1217	561	654	219
	DDX41	TTCCTTGAAGCTCTTGATGGGT	202	333	279	430	729	375	217	526	337
	CHMP4A	TTGTCAATGTCCATGTCCTGGT	222	282	310	110	360	141	542	1	187
	PHF1	TAACAGTAACTCTGCTGTCGGT	232	260	322	133	392	322	361	223	319
	SCMH1	TTCATCATCATGTCACTGCGCA	246	300	268	131	420	447	925	60	22
	MAEL	TTTTGTAACACAGTTGCTTGGT	259	264	291	279	672	515	195	3	452
	BAHCC1	TTTGCATGCATTCTGCTTGGGG	259	293	262	459	312	503	565	66	441
	SSRP1	TTTGACAACACATTCTGGGCAA	276	282	256	566	404	235	109	1	423
	NCOA1	TTTTGGTGTATCAACTGCTGTT	259	282	274	248	296	572	48	520	789
	NAT6	TGAACCAGAAAGACAGTTCCTT	195	256	365	256	134	743	176	452	233
	SUPV3L1	TTTTGCTTGAGCAAGTTTGGTC	202	278	336	407	522	587	240	776	387
	GADD45A	TGCAAAGTCATCTATCTCCGGG	209	231	376	318	764	597	644	170	291
	SAP30L	TAGTTTTGCACATGCAACTGTC	242	275	299	720	513	238	482	9	291
	PRM2	TGGTGTTACTGTTGGTCTGGTC	293	227	296	436	265	512	329	69	570
	PPARGC1A	TGAGTTGTGCATACAACTCGGA	175	275	367	331	198	478	7	387	144
	SMARCC1	TGCTTTATCACCTTCATCCGTT	222	304	291	420	411	144	389	321	527
	TDRD10	TTGCAAGTGTCACTTTCTGCAT	239	322	256	16	255	328	160	1	201
	CBX1	TTTAAAGTGAACCACTGCCCAA	246	275	296	673	602	147	498	624	83
	APOBEC3C	TACTGGAAGTAGTAGAGGCGGG	269	249	299	839	459	980	686	1040	255
	BCORL1	TAACAAGGGAGGTATCTGCCAA	269	260	288	509	309	359	345	330	441
	MTA2	TTGCAACCAACTCTAATCTCGC	276	267	274	201	646	356	217	253	190
	SP110	TAAATCGTCACCAGATTGGGAT	289	260	268	21	299	331	48	161	215
	INTS12	TTTTGTGCTTGAAATTTTGGGT	219	289	310	459	443	238	198	99	83
	MUM1	TCTGAGACAATCGTGTTCCGAT	263	256	299	438	350	163	545	3	481
	ERCC5	TCCTACACAACAAAGATGGCAA	279	234	305	472	385	316	306	491	796
	CAMKMT	TACAGATACATGTCGCAGGCAA	303	267	248	712	589	643	453	87	649
	TSPYL2	TTCGGGTCAACTAACCTCTGGG	165	403	251	691	497	447	526	48	352
	VPS72	TAAGTCGTCTGGTAGAACTCAT	269	245	305	360	182	575	571	217	531
	MTA3	TTAATAGCAACAAACGGCCGTC	185	293	342	347	723	272	542	767	606
	H2AFY2	TTTGAGGTCAATTTCGGCTGTG	212	326	282	175	354	572	772	512	588
	PARP10	TCCATCAATAGCACCATCTCCA	256	245	319	370	255	325	679	425	610
	TRIM37	TAAACTACTGGTAGCAGCGGAG	263	227	330	595	1486	625	275	1602	266
	ZHX2	TTTGACACCGATATCGGTGGTC	242	286	293	326	334	350	157	125	366
	HIST1H3G	TGGATAGAATTACTGCCCGGAA	249	242	330	548	500	543	781	60	713
	PKNOX1	TAAGATGTCATTCTCGGCCGGG	252	253	316	412	443	993	377	327	190
	UBA2	TTTACATCTAGAACCTGCTGGT	266	267	288	391	344	509	899	315	434
	PRDM4	TACATCTACATGACCTGTCCCC	273	297	251	662	751	228	794	280	291
	INO80D	TAGCTATACACCTTGACACGGC	306	267	248	342	382	1040	326	720	262
	PRDM15	TGCTTGTTCATATTGCTCCGGC	205	264	353	485	331	1246	153	408	488
	PPP5C	TTCATGTTGTCTGTCTCGTGGT	229	311	282	73	389	316	746	443	502
	MAZ	TGTGGTCCGAAATATAAGCCGA	242	213	367	404	605	250	329	277	552
	LMNA	TTCTTATACTGCTCCACCTGGT	273	275	274	206	1082	899	520	532	585
	CCDC101	TTGATCAGCTGATGGAGCTCTG	273	278	271	668	563	244	265	416	592
	KDM5D	TTGAGATCCAACGTCTCTGGGA	276	278	268	92	102	537	303	24	208
	PHF2	TGCACTTGTAGCATTTGTCGAC	226	238	359	462	125	525	294	99	900
	TERF1	TTAACATGACACTTGTCCGGTT	246	289	288	686	401	528	198	776	309
	USP35	TGAACTTCTTAACAGCAGCCAG	263	224	336	608	548	877	533	838	413
	SFMBT1	TTATCCAGAACCATCCGTGGAC	263	267	293	811	678	297	131	1459	370
	UBR3	TTGCAGACCATTTCTTACCCAC	205	300	319	258	538	1305	1068	553	656
	HIST1H4A	TTCTCCAAAAACACCTTGAGCA	239	337	248	256	303	540	501	289	294
	ING1	TTACAGCTCACATACAGCAGGA	283	256	285	459	408	575	185	232	155
	MLL4	TTGACCTTGACCTTGACCTGAT	252	260	313	558	322	537	861	515	402
	ZCWPW1	TTCTCTAAGCAGGATCCTGGGC	266	308	251	501	319	434	259	559	384
	EYA1	TAGCTCTTCAACTACTTCGGGT	279	267	279	576	586	316	896	544	269
	INO80D	TTGACAAGGTAGCAGAACGGAG	246	267	313	709	185	185	638	788	456
	LMNB1	TTTCTGATCATCTCCCAGCCTC	259	282	285	558	910	1018	482	449	577
	RAD51	TTATCCAGGACATCACTGCCAG	303	238	285	1280	274	534	906	1323	488
	INO80D	TACACATCACTTCACAACTGGT	303	264	259	311	214	428	42	1082	481
	HIST1H3I	TTTAGGCATAATAGTGACGCGT	239	289	299	660	392	160	20	27	165
	KLF1	TCCCAAACAACTCAGGAAGGAG	266	245	316	363	589	509	498	405	835
	SUMO4	TTGTCTGTTCCACTGATTGGTT	229	300	299	178	544	409	612	574	825
	RPH3A	TACAGAGACACAACACAGGGAA	276	253	299	1032	481	1065	278	1029	495
	NFYB	TTGGCTTCTATTTCACACCGTT	299	264	265	509	570	284	453	509	294
	ZAK	TAGGAGTTGAACATTCCGCCTC	320	249	259	303	312	216	412	351	201
	CHMP5	TAGAGCAAAACCAGAAACGGAA	350	216	262	219	465	375	530	54	323
	CENPC1	TTTGAGATGATCCAGACCGGAC	216	308	305	235	563	559	530	298	828
	PWWP2B	TGGGAAGAAATACACTCAGCGG	236	209	384	873	672	334	415	657	219
	SMARCD1	TTTCTGTAGTGCTACAGGGCAA	239	271	319	485	280	537	1059	250	276
	MTF2	TACATTTGCAGCACTGTAGCAT	273	271	285	472	341	631	450	1617	334
	HIST1H3H	TTTCTGATCAGCAGCTCGGTGG	242	297	291	344	274	475	383	1168	305
	KDM5A	TATACACCAATGTCGGTCCGGG	266	231	333	326	474	306	345	648	151
	SP140	TCCTGCTGAACAATGCTTCCAG	266	242	322	834	334	506	667	535	531
	FBXO44	TTGGCAAAGAGTAACACCAGGA	266	256	308	238	207	556	182	904	409
	PRKCD	TAGACTGTTTGCAATCCACGTC	303	253	274	519	964	462	769	357	936
	C17orf96	TTATTTAGGTCCCTCTGCCCAC	229	286	316	347	271	303	654	336	205
	SMYD4	TTAGAGTACAGCACTGCAGCTC	232	300	299	905	160	834	415	6	112
	RING1	TTGTGTCCTCTTATTGGCTGGC	263	297	271	631	605	547	338	312	183
	TFPT	TCAATCTGTAGGTTAAGCCGTT	296	242	293	279	284	309	686	1	413
	PADI4	TTTCATCCTGCATCCACTGGTC	195	304	333	618	716	440	357	440	563
	HDAC2	TTTTCCAGCACCAATATCCCTC	232	275	325	790	802	444	316	298	549
	NFYB	TTGTAGAACTGTCACCATCCAT	236	322	274	261	455	893	310	381	413
	PHF2	TTTGTTTCCAGCTAGAGGCGAC	249	275	308	558	513	478	447	277	638
	RPA3	TTTTGCGGAATGATACGTGGTG	259	245	328	277	417	266	176	972	527
	DMAP1	TATCTTAAGGTCTGTGCCTGGC	266	253	313	305	824	372	721	107	362
	SMARCAL1	TAGATCTTCTGCTGCTTTGGGT	286	278	268	175	217	309	173	307	18
	C17orf49	TCAATATCCACCACGTCACTGT	296	231	305	264	296	181	265	12	588
	DHX58	TCTAGTAGGTAGGTCTGCCCAG	239	264	330	660	570	690	1094	167	864
	TAF5L	TTCATGACTGAACATCCCAGGC	279	300	254	532	462	291	733	12	405
	DHX30	TTGACTGGGTACATGAAGCCAG	293	264	276	212	554	384	55	345	427
	KDM3B	TAGATTGTGAACCTGGTGTGGG	293	275	265	561	551	572	523	1100	244
	DHX29	TAACTGCTGAGATTCTTCGGGG	209	275	350	558	417	809	322	360	509
	DDX49	TGATCTCACACTCTCTTCGCAC	229	238	367	206	306	306	389	208	126
	RAD54L	TAGAGCTGTAACCAGGAGGGAA	249	289	296	316	268	475	335	405	452
	SNRNP200	TTCATCTGCCTTCTTCTGCGAC	252	300	282	149	875	781	657	87	47
	CENPV	TCTTACAGAAGGTATGCTGGGC	263	238	333	806	684	799	405	601	739
	DDX39A	TCTAGCTTCTCAACAGTGGCGC	222	297	316	266	328	684	915	15	1255
	HNRNPA1	TTGCATTCATAGCTGCATCCAC	273	249	313	298	455	453	565	63	481
	SP110	TTGAGCTTCTTTTGGATTCCGT	202	289	345	808	299	334	437	333	481
	CHAF1B	TCACAAATGAGCAGTAACCGTC	246	260	330	647	522	66	708	128	710
	ART1	TGTCTTTGATGTACTCGCAGTT	249	242	345	251	99	107	51	72	606
	NFE2	TTGGAACTTCCAAACACTTGTT	273	304	259	780	414	409	348	241	323
	HIST1H3G	TCTTGAAGTCCTGAGCGATTTC	283	271	282	433	459	353	412	708	373
	USP35	TCATTGAACAGGTACCACTGGT	293	264	279	217	258	341	335	173	853
	PARP15	TTATCAGCAACTGTGATAGGGT	232	289	316	438	878	328	313	336	51
	ZNF787	TTCTCTCCATTGTCTCTCCGGC	246	289	302	219	191	1227	539	589	516
	NAT6	TGATATTGTGTCTCCAGCAGGC	252	220	365	509	210	662	367	399	456
	TET1	TAAAACATAATCTCGCAAGGGT	273	242	322	199	602	338	348	431	448
	SETDB1	TACAATGCCAGCATAGAGCCAG	279	245	313	271	522	462	778	770	341
	HIST1H2BM	TACGCTCAAAGATGTCGTTGAC	219	286	333	378	252	313	354	651	549
	FEN1	TTCTTCATTTGGCTCGCTCCAC	249	304	285	363	821	534	463	9	1305
	PCGF6	TTGAACAGCAAAGTGGTAGCAA	249	260	330	753	573	587	300	286	495
	MTA3	TGAAACAAGGTGATGTCTCGGG	252	234	353	342	325	219	842	785	251
	HMGN5	TGTTTCAACAGATCTCGCGGTG	266	231	342	415	230	384	281	36	309
	FKBP1A	TGGAGATATAGTCAGTTTGGCT	266	260	313	488	252	203	240	191	29
	MIS12	TTGGTTTGAACAGTCACTGGTA	226	326	288	113	245	278	440	369	405
	HIST2H4A	TGAATGTTGTCTCTCAAGACCT	239	271	330	21	201	88	157	48	305
	HIST1H4E	TCACGAATCACGTTTTCCAGAA	246	289	305	180	697	643	871	708	635
	CENPT	TAGGATGTTCTTCAGCAGCGTC	390	216	234	795	662	799	832	720	1294
	FUS	TTGAGAGGAAAGCACTTCCCAA	199	275	367	240	494	437	377	327	266
	RFWD2	TTCTTTGTCTGAGAACTGCCAC	226	322	293	879	424	578	839	589	395
	RNF217	TTGCACTTTGGACACTTCTGGG	252	253	336	654	598	509	211	324	667
	PHF20	TTGACAGTCTGAACTACTCCAT	236	293	313	342	462	484	466	128	194
	ELP3	TTGTTTTGCTTTCACACACGGG	246	286	310	704	481	880	284	776	678
	H3F3B	TATCCACCAAACAACACCTGAA	256	264	322	225	484	855	297	9	198
	CENPH	TCCATCTGTAGGTTTTGTCGTA	323	282	237	344	350	325	373	143	1032
	INO80E	TAGGAGGAAACTCTTGTCCCGG	367	227	248	469	618	1364	319	589	334
	MORF4L1	TTGAGTACTCTGCTCTCCGGAA	216	297	330	962	723	216	418	803	513
	ASCC3	TTTCCCATCACTCTGTCAGCTC	216	297	330	884	589	319	539	399	370
	SSRP1	TTGTAGTCAAAGGTCTTGCCAT	236	322	285	188	719	759	501	1061	699
	TRIM5	TTTCCTAGAGGAACCGCAGGAA	242	282	319	563	513	525	475	696	402
	RBBP7	TAAAGCTACGGTCTTATCCGCA	283	278	282	524	560	206	689	6	262
	PRDM12	TTTCCATTGTGCCTCCACTCTC	286	249	308	368	548	475	561	624	309
	CSNK2A1	TATAAATCCACAAGCAACGGTT	313	231	299	128	500	319	437	728	36
	CBX6	TGATGTGAAGTGAAGGTCCGAC	212	256	376	665	385	469	322	476	36
	CHRAC1	TTTGCCAAAACTCAGAACTGTA	229	322	293	600	1079	334	781	827	875
	DHX29	TAGAATAGCATGCTGAGTGCGG	383	176	285	316	411	843	230	363	241
	FKBP2	TTTTGGAACAGTCTGGTCCCTG	242	275	328	759	344	419	396	601	405
	HIST1H4J	ATTGATAGAAAGGGACGCTCAA	289	231	325	342	490	191	217	146	244
	PHF15	TTGCAAATGCTCACACACTGTC	296	267	282	324	398	865	370	381	323
	PAF1	TATTGCAGTACTTGACTCGGCA	299	227	319	477	385	400	612	708	291
	DDX31	TACTTTGCTTCTGAACACTGGT	313	253	279	251	583	478	99	428	180
	HNRNPA2B1	TTTCTTGTCTAGACAAAGCCTT	199	322	325	725	265	269	440	663	384
	HIST1H2AM	TTAGCTTTGTGGTGGCTCTCAG	242	308	296	753	392	525	530	506	230
	BRD9	TTATTCTGCATCGAAAGCGCAG	246	278	322	905	544	325	450	889	194
	PNMT	TCCAGGAAATCTGTCATGGTGA	246	278	322	529	350	924	322	128	291
	RAG2	TTTGAGTCAGGATTGCACTGGA	256	286	305	92	258	216	189	119	233
	TSSK6	TTGTACTTCTTGGATGTGGCCA	266	322	259	920	1371	640	1288	1352	319
	NCOR2	TTGTATTCAGGCTCATTCCGGT	276	275	296	178	697	150	408	81	1097
	HSPBAP1	TTTCATGTGCTCTCCATCTGTT	252	337	259	196	296	191	985	250	248
	ACTR3B	TTGGTCAACTACCTTTGCTGAC	283	286	279	654	319	163	428	446	233
	HMG20A	TTTTGTGGCATCTGAATCCCAG	296	293	259	819	738	431	520	422	284
	MORC4	TAGAATACCACAAAATGCCCTT	353	256	239	206	242	178	364	779	266
	CHMP2A	TTGTTGGACTTGAGTGTCTGGA	242	311	296	386	140	453	450	241	194
	CCDC79	TTTGATTGCAGCTTGACTTGGC	259	282	308	985	296	256	504	310	355
	HIST1H2AC	TGCAATCAGACAAAAATCACCA	219	286	345	16	217	235	150	1	413
	CHMP6	TATCGCTTCTTCTTGAGCAGCA	246	322	282	324	513	618	297	330	208
	CHAF1A	TAGAACTCTGCACACTTTGGGG	266	256	328	550	223	459	1	39	258
	HIST1H2AM	TAAAGTTCAGCCCTTACTTGCC	276	289	285	446	586	341	412	520	47
	HMGA1	TAAGTGGGATGTTAGCCTTGTC	293	286	271	488	102	350	466	345	183
	TRRAP	TAAATCTGTGTCTCTTTGGGTT	320	271	259	412	137	72	112	191	101
	DDX6	TAACTTGCTCTCTTGCACGGAA	326	242	282	230	627	590	300	627	556
	CXXC5	TGAATTTGCAAATCTGATGGCC	209	238	404	274	481	338	300	298	405
	PPHLN1	TTGTGTTTGACTCAGGTTCCTC	229	293	330	756	583	668	612	547	799
	PRDM15	TTCTCTTGTGACTTCGCTTGGC	242	348	262	569	287	244	163	547	391
	AKAP8	TAGGTATGCATCACCGTGCCTG	363	198	291	717	474	456	150	743	620
	ERCC5	TGGCAAATAATACAGAAGCCAC	303	220	330	503	287	166	351	1617	334
	CDC5L	TAGAGAGCTAGCAAAATCCCAA	310	267	276	253	449	210	373	461	663
	SNAPC4	TCTTTCTGTGTGCAGCTCCGAG	229	300	325	1032	490	303	1157	125	402
	APBB1	TTCTCCATGAGCAAAACCTGTC	246	315	293	342	713	862	434	419	774
	HLTF	TTGAACTGGATGTCCATTCCAT	259	293	302	334	471	356	294	1391	925
	USP22	TGATAGAACAGCAAGTACCCTT	296	245	313	318	484	369	746	402	108
	ACTR6	TCTAATCCTGTAGAGAACCGGC	226	304	325	316	331	509	313	479	194
	AP2A1	TCTTTGCTCTTACAGTTCCGGA	232	293	330	256	525	824	957	208	273
	CDC34	TTCAAACAAACCAAAGCAGGGA	239	304	313	477	452	362	386	3	413
	SOX15	TATAATTGTATGTTGTGCGGCT	249	322	285	324	414	459	389	1	377
	CHD5	TCTTCTTCTTCTGACATCTCGT	256	267	333	920	175	475	504	452	656
	ACTL6B	TATCAATGTCACACATGCCGAT	263	271	322	472	280	366	679	312	212
	CHD4	TTGAACAGGTCGTAATCCTGGA	205	319	333	146	859	450	294	24	599
	DDX23	TTCAGCTCGTAGAACACAGCAG	232	366	259	279	417	447	189	96	273
	RFXANK	TGCCTTTGAAGTCAGTTCTGGG	242	256	359	412	446	877	794	321	334
	WHSC1L1	TTCAGCACAGATCTTGGTCGTC	246	326	285	595	449	1324	1	176	241
	BAHD1	TTTGGTTTGATTTCAGGTGGGT	269	300	288	391	640	628	342	538	402
	GTF2F1	TAGCAAAGTTGACTTTGTCGGC	330	271	256	326	185	75	332	794	176
	PRDM11	TATAGCGGTTGTTCTTGTCCAC	256	286	316	800	280	431	144	310	280
	HMG20A	TGGTGTAGCAACATGACAGGTA	306	216	336	201	344	169	345	1	445
	ALKBH2	TGCTTTCTTTGTCTCCTCCCAA	212	234	413	912	532	1193	835	627	542
	PYGO2	TTTAGTGTGAGGGACACTGGGA	236	293	330	542	261	481	313	627	11
	WRN	TTGATGACTTCCAACAGAGGGG	242	289	328	139	780	509	896	622	205
	AURKB	TCAAGTAGATCCTCCTCCGGTC	273	253	333	1105	729	584	472	51	201
	GADD45A	TAGTTTTCCTTCCTGCATGGTT	286	271	302	975	471	1333	718	532	445
	PHF13	TTTCACAGAAACAGCTTCGCTT	289	271	299	412	398	231	673	473	26
	MBD1	TTGAAGGCAATTCTCTGTGCTC	283	267	310	821	729	362	319	173	696
	NAA60	TAGTCCAAAATCGTCCAGGGAG	289	249	322	402	207	369	542	622	112
	HIST1H4A	TGTGGAGAAATCAGCAACCTTA	299	245	316	285	824	687	692	1647	86
	HDAC4	TACAGTGTCGTTACAACTTGGT	313	234	313	582	691	793	370	226	284
	RAD51	TAGCGTATGACAGATCTGGGTC	323	227	310	381	338	206	179	1	212
	BRD8	TTCTGCATCTCTCTTTAGCCGT	219	337	305	430	379	572	845	838	545
	RAI1	TTGTACACGAAATCTAGCGCTG	226	333	302	165	529	403	603	84	581
	MTA2	TTTGGCTTAGTGTAGGTGGGAA	242	351	268	488	312	481	510	592	194
	DAPK3	TGTTGCTGAAGTACTCCTCGTC	256	289	316	480	389	281	163	116	58
	ERCC6L2	TACTTCCATCAAGTCGTCGGTA	266	256	339	628	204	650	249	904	86
	PRDM11	TTGTTGTTGCACACTGACTGTA	269	282	310	561	373	238	122	544	721
	BRD2	TAGAATTGAGCTGTCCGCTGAC	313	260	288	962	557	412	657	396	362
	UBE2C	TTTGAGTAGGTTTCTTGCAGGT	273	308	282	264	389	550	539	491	821
	SETDB1	TCTTCTTGTTGACAGCATCCAT	310	271	282	975	703	406	606	402	370
	HIST2H2BF	TCTTCTGCACTTTCGTAACAGC	316	202	345	342	570	1046	609	402	635
	USP3	TTTCTTGATTCTTAGAGCGCTT	222	326	316	1282	579	771	788	541	893
	CDK9	TTAGAAAAAGTCACTGGTGGGC	276	289	299	123	319	425	284	800	79
	ASMT	TTTGACGTTAGTTCCAGGTCAC	279	286	299	503	341	347	679	90	280
	ERCC6	TAGAATTGCCACTCTGAACGGA	283	231	350	451	923	593	514	1932	355
	FBXW9	TCTTGTCAGTGGATGTGGTGTA	289	253	322	886	439	606	746	318	810
	TCF20	TTGACTAACCAAGACATTGGGC	269	271	325	238	529	403	402	286	674
	DDX56	TTCTGACCTACAGACTTGCGTC	239	351	276	131	459	138	660	307	241
	SPC24	TCAATCTCCTTGAGCTCTTCCA	263	315	288	592	878	256	810	559	907
	TET3	TAGATGACCTTCTCGATCCGGA	326	238	302	253	315	444	291	21	201
	CENPE	TTACTTGGTGGTTCTGTCGGTC	246	311	310	459	424	422	326	702	323
	HDGFRP2	TTGTTCGCTTTGTAACGGCGAA	256	315	296	329	831	378	479	45	262
	TRIM28	TTGCACATAACCAGATCGCCTG	259	289	319	433	427	462	153	470	456
	PWWP2B	TAGGAGATCTTGATGACCGGGC	323	256	288	219	144	322	77	390	305
	H1FOO	TTTTGAACTCTTACTCTCAGCT	239	330	299	454	366	575	577	191	681
	VPS72	TATGTCTGTAACAGGGTCCCGG	242	293	333	772	554	650	1110	310	334
	GTF2F1	TCCAGAATTGCTAACTACGGGG	276	267	325	384	535	618	670	223	742
	UBE2M	TTGTCTCACACTTCACCTTGGG	283	289	296	357	160	662	297	1870	405
	PHF7	TATTTCTGTATGCACTTGCGGT	256	308	305	668	455	400	988	601	423
	SMYD5	TTGTGAAGGAGTAAGAACCCAA	256	351	262	253	144	147	428	342	552
	NSD1	TAGCTTTACAGTTGCAACGGGG	269	275	325	305	513	256	392	467	341
	TERF2	TAATCATCACAGCTGTTCGGTT	276	260	333	274	427	316	345	6	309
	CSNK2B	TGGTGTCTTGATGACTTGGGTG	296	220	353	128	395	303	351	577	731
	H2BFM	TTGTCAGGTACACAGCTCTGTC	185	315	370	879	385	522	686	310	506
	HIST2H3D	TAAAAATATGCCTTAGGCCCGC	263	278	330	605	357	781	179	336	534
	ARID1A	TCTAGGATCTTGATGTTCCGGT	283	253	336	165	401	478	217	1	495
	SRC	TAAGACACCTTACACAAAGGGC	370	209	293	436	529	465	584	411	266
	GLI3	TTCCAAAGGAGACACATCCGTT	212	333	328	595	277	135	479	1043	653
	HLCS	TTGAGTTAACCAGAACTCCGCC	222	315	336	316	668	210	262	241	348
	DDX24	TTTGGGAACAGGTTTCTCCCTG	232	308	333	475	468	141	26	345	255
	MCM7	TCATCTTCACAATCCGATGGGC	256	275	342	300	255	228	523	6	165
	KEAP1	TGCATGTAGATGTACTCCCGGG	263	209	401	308	411	768	507	491	284
	SKA3	TAATAGAGCACAATGGACAGGT	306	242	325	459	242	294	147	185	15
	HDAC6	TGATCTCACAAGAACCTCCCAG	222	245	407	433	360	294	931	6	456
	MCM4	TCATCTTGTCGAACTCATCGAT	276	282	316	1405	859	153	418	428	266
	USP51	TAAGGTTGAATGGTCACTGGTT	326	249	299	420	614	94	268	761	760
	ZNF740	TTTAGGTGGTAACTGCTCCGAA	249	333	293	355	567	1258	424	414	219
	FBXO10	TTGTGGTAAATGTTGTTGCCGG	266	293	316	428	417	353	106	24	502
	INO80B	TCTTGTGTTTCTTCTTGTGCTT	340	227	308	720	859	609	957	945	516
	ARIH2	TAGGACAGAAGCTAAGCTGGTC	407	194	274	167	354	806	10	185	133
	MTA2	TAAAACTGGACTATGCTGGCAA	276	264	336	790	185	381	338	271	699
	VRK2	TCCAGTACATCCAACATTCGGA	279	267	330	595	144	550	612	1150	556
	WDR77	TAACTGGCAATATCCACTCCAC	296	278	302	467	389	478	412	354	405
	PRKCB	TTTGCGTTCAAGTTTCTCCCAA	216	348	313	548	338	547	380	179	391
	AEBP2	TTTAGTGTAAAAACTGCTGGTT	283	289	305	326	128	444	51	250	327
	CBX1	TAAACAGTCTCTCACAGTCCTT	289	289	299	162	55	219	402	1	4
	MLLT6	TTAAGTTTCGCTCTAAGTGGGC	226	322	330	501	417	303	316	945	183
	PARP14	TTGGTGTTCAAGTTCTTCGGGG	256	304	319	128	799	469	568	1	355
	DHX8	TCTTCATCCAACATGGTCCGAA	276	275	328	235	516	450	131	27	241
	KAT6A	TATTGGATTAGTATAGCGCCGT	293	267	319	483	770	278	791	176	570
	HP1BP3	TTTTCGAATAGCAACCACTGAT	232	289	359	644	494	834	255	440	610
	DDX19B	TTGTTTGCAGGTTCTACTTGGC	299	293	288	415	204	625	899	666	183
	SKA1	TCACTCAACACAAAAACTGGAC	306	315	259	550	404	522	456	458	248
	DOT1L	TAGTTTTCAAGTATGGTGCGGT	310	271	299	574	347	437	577	241	370
	H1FOO	TTCAGATTCAGGAGACCTGGAT	226	370	285	423	280	157	1403	532	172
	FLYWCH1	TTGTAGAGGAACGACTCGTGTA	273	300	308	496	255	316	549	506	294
	CHMP3	TTATGATCCAGCACTGAAGCTC	283	282	316	587	783	384	718	259	258
	LRWD1	TTAGTTAGCTGTGTCCCTGGTC	199	344	339	483	131	344	504	330	344
	HIST1H4K	TGTTGATAGAAAGGGACGCTCA	259	264	359	485	586	528	338	75	416
	BRCA2	TAAAATTTCATCTGAAACCGGT	269	300	313	449	592	628	182	12	355
	SBNO1	TTGAATTGCTCTATCAGCGCTC	286	260	336	300	430	497	494	125	262
	APOBEC3G	TTAAGTTCGGAATACACCTGGC	330	264	288	352	385	659	351	657	205
	ELP4	TAACCCAATAGGAACTCTGGGA	276	234	373	225	210	628	173	336	373
	SMN1	TTCATCTGTTGAAACTTGGCTT	209	362	313	443	191	359	87	152	384
	HIST1H3D	TCACAAGACAATTTACGCCCTC	226	322	336	230	322	422	501	176	226
	HIST2H2AC	TCTTTGGTAACAGAACGGCCTG	246	282	356	767	598	428	514	951	760
	MLLT10	TTCATACTATGGGAGACCTCGT	249	322	313	402	430	128	858	411	341
	METTL2B	TCTTCGAAGAACACTTGTGCTG	266	293	325	709	843	1155	769	743	903
	RPA1	TTGAAGGTCATCTCGTAGTCAT	289	293	302	605	576	465	456	229	545
	DDX1	TTATGTTCCTTGATTGCCCGGA	296	300	288	303	633	709	1339	1632	362
	HIST1H4F	TCCCGTATCACATTCTCCAGGA	209	289	387	305	684	472	243	1168	323
	PNMT	TGAACCAATGTCGATGAGGGTG	226	238	421	657	665	787	775	1058	620
	C11orf30	TTGTACAACAATCACGTTGGGC	239	344	302	261	347	409	673	140	190
	PRDM4	TTACAGAGATGCACATCTGGGT	246	311	328	76	331	818	246	63	208
	CTCF	TTTGCTGACTTCTACACTGGCG	299	293	293	334	354	300	364	1480	269
	MAU2	TTGACAGAGACACAGTACAGGC	269	304	313	527	598	699	357	755	65
	DDX3X	TACTTTGTCGGTAGTCTCTGGC	273	300	313	209	532	597	899	761	409
	PCGF1	TCCATCTTGTACACTGACTGGA	296	271	319	258	414	72	587	467	699
	JMJD7	TTCAACATGTCCTGTGTGCCAG	246	311	330	185	455	416	319	396	488
	HDAC5	TTTGGTTTCCTACAGGCTGGAT	246	319	322	678	770	802	399	622	427
	KDM4E	TTTGGGTTGTAACAGTGCCCTG	259	326	302	975	414	621	667	654	1133
	ACTB	TGGATAGCAACGTACATGGCTG	273	249	365	795	691	600	1253	437	1269
	ADA	TAGTAGTCAAACTTGGCCAGGA	286	282	319	725	856	475	268	684	448
	CENPN	TTAGAAGTGTGCAACCTTGCAC	249	311	328	131	319	678	447	21	323
	HIF1AN	TATCTTCACATCCACACTGCAT	296	227	365	438	385	313	357	393	223
	HINFP	TAGCAGTGGAAGTAGACATGGC	336	256	296	631	204	400	348	48	330
	CENPI	TAGAGGACGAACATTAGCTGGA	367	242	279	1592	315	387	77	1400	273
	C14orf169	TCGTGAATGAAGTCTTTGGCTC	246	278	365	55	646	862	370	375	287
	CCDC101	TCATCGATGTCATCTACCTCAT	306	278	305	503	210	528	676	348	699
	ERCC6L2	TACAGTACTGCTGTAGCACGTC	316	245	328	529	290	341	428	321	223
	PRMT8	TACTGTGAAATCGAGGTCTCGC	343	253	293	175	408	983	204	726	158
	PKN1	TTCGTGAAGAAACTGTAGGCCC	185	454	251	553	290	166	431	1	456
	HDAC3	TCCATCATAGAACTCATTGGGT	269	311	310	503	303	481	291	217	631
	PADI1	TAGAACTTGATCTCCTGCTCCC	273	315	302	378	293	721	287	693	509
	ZNF787	TTCTAAAAGAGAAAAGGGCCCC	222	344	325	516	497	235	1690	467	961
	AURKB	TTCCAAACTTGCCTTTGCCCAG	252	326	313	144	824	612	479	898	205
	BRWD3	TTTGTTACTTTGCATCTGCGGG	259	319	313	634	322	188	982	559	205
	MORF4L1	TCAACAGTAGGATCTACCCGGG	273	282	336	206	484	915	185	185	155
	MYC	TTTCCACAGAAACAACATCGAT	296	293	302	618	439	559	628	167	212
	MEN1	TTCATCTGCACTTGCGACTGTG	306	297	288	912	497	606	466	155	122
	ASF1B	TCTGATACCATCTTCCAACCAT	296	300	296	652	751	297	243	113	868
	NFYB	TACAGAGCAACAAACTCTCGTA	353	234	305	159	719	740	227	509	413
	ACTL6A	TTTGCAATCAATTTCAACCGCA	226	359	308	92	427	472	287	51	663
	COQ5	TTCTCTTGGGACAAGAGCCGAG	246	362	285	264	678	375	268	717	617
	TDRD5	TTACACAACAGAGATGTCCCGG	276	289	328	266	513	325	581	925	939
	BRD2	TTTCTCATTCGCTTTCTTGGGG	266	275	353	292	627	353	784	149	789
	SAP30L	TTTTGCACATGCAACTGTCCTG	269	289	336	621	548	531	278	318	563
	EP300	TTTGCTTTAAACCACAAACGGC	269	297	328	688	894	1046	361	149	262
	FOXA3	TATAGGAATACGGTGGCTTGGC	279	253	362	709	354	831	705	1326	499
	CENPM	TAAATGGAGATGTAACACGCCA	330	245	319	876	315	684	526	45	638
	MINA	TTCTGTACCATCTCCTACCCAC	182	403	310	480	487	169	616	36	126
	PCGF1	TCAGCTCTAACAGAACATCGGA	239	326	330	759	382	621	271	265	413
	TDRD12	TTTCTCAGAAGCAACAATCCAT	242	308	345	188	223	256	173	220	344
	L3MBTL4	TTGGTCTTTTCACACCATCCTA	279	300	316	201	662	475	275	366	373
	KEAP1	TTCATTGCTGTGATCATTCGCC	236	384	276	248	309	147	542	244	513
	DHX37	TTGAAATGCACAGTCACTGGGA	286	300	310	639	172	593	13	3	244
	MCM2	TCATCTTCACATCTTCATCGGT	316	275	305	92	169	244	530	523	273
	HMGA2	TGAGATTGAAAGTGCCTTGGGC	222	256	419	537	401	350	386	78	352
	LMNB2	TTTAACAAAGAACTGCCGCGTG	256	311	330	235	430	537	762	422	438
	NFE2	TGAGGGATAATCCTGAGTCGGA	175	231	492	363	239	247	71	883	305
	NONO	TTCTTCCTCAGTGATGTCGGGA	229	359	310	800	777	281	342	1	29
	RNF217	TAATTTTCCAGCACAGACTGAC	289	264	345	595	882	940	504	354	395
	BRCA2	TTTTAGTTGAAGAAGCACCCTT	256	293	350	691	417	469	198	832	269
	METTL6	TTGCAAAGAAGCCATCTCTGAA	289	348	262	277	541	528	351	1005	570
	FOXO4	TAGCACATGATACAATCTGGGT	424	253	222	503	382	338	42	27	391
	CDK3	TTCTGGAACATATCCATGGCCA	202	373	325	641	331	160	128	18	602
	HIST1H3E	TGTACTCAAAACAATTCACGCC	259	271	370	563	245	266	131	529	542
	KDM6B	TTCTCACACAAAAATCACCGAA	259	359	282	1134	624	506	721	613	581
	C14orf169	TATCATACAACGTGGTTGCCAA	330	231	339	613	334	494	128	244	208
	CTSL1	TTCCACAATGGTTTCTCCGGTC	263	359	279	399	751	640	42	253	635
	FBXO10	TTTACAGCGACTCACATTGGGG	212	308	382	988	373	980	1553	847	420
	APOBEC3G	TTCTGGTTTTAGGACAGCCCTC	229	388	285	524	843	921	501	782	721
	TDRD10	TTTCCAACAGGATCTCCTCGTC	266	297	339	621	344	615	102	470	681
	DNA2	TTGAGGTAGAGAAGCAAGCCAG	276	304	322	863	551	559	437	437	151
	C17orf96	TTTGGGTGTCCAAAGAATGGAC	236	348	319	269	408	269	727	931	162
	TBL1Y	TTGTGTTTGAACAGAGCTGCAA	276	319	308	282	474	756	217	119	352
	HIST1H2AE	TAGCTCTAAGATCTCGGCCGTC	350	260	293	845	459	809	1320	419	502
	PRDM13	TTCCAGAGTCTGTTCCTGGGAG	168	406	330	316	354	416	581	627	459
	SETD1B	TTTCCTTGATCTTGAAACCGGC	229	322	353	240	681	678	313	99	595
	DHX15	TAGCATTTGTTGAAGCTCGCAA	340	282	282	490	125	662	322	550	190
	HIST1H3C	TCAATGAGGAAGAAACGGGCAG	303	289	313	235	567	543	568	48	362
	RCOR2	TAGTATTTCACCAGGCTGGGAA	320	238	347	334	901	344	192	223	233
	IKBKAP	TTGTGGTCTATGGTCATCCCAG	283	304	319	563	780	737	561	520	69
	WBSCR27	TGTATTGAAGGTTGGACGAGTT	205	289	413	258	350	1005	342	1023	1172
	USP3	TTGCAGGACAAGTACAACTGAA	303	282	322	740	424	334	428	482	237
	CDCA2	TAGACACATCTTAACAGAGGGT	340	234	333	66	242	384	224	289	51
	PYGO2	TTCGCTTCTTTTCTGGACTCTT	168	509	231	412	296	375	635	369	255
	ERCC3	TTCTTAAGCGGCATTCTCGGAT	202	359	347	399	217	319	335	488	190
	CHD3	TTTCACTTTACGCTTGTCGCTC	266	340	302	407	548	316	1192	610	434
	RBL2	TTTCTTAGCTGGTTGATCCCTA	276	344	288	490	525	437	1878	622	513
	TRIM37	TAGACTACCTGCTACACTGGAT	326	278	305	261	751	559	692	859	803
	ZZZ3	TTGTAACACGAGTAGATCGGGA	293	275	342	277	363	793	99	188	305
	PWWP2B	TCCTTGTACTGTTGAAGCCCGG	323	245	342	318	503	902	39	1139	896
	PRMT6	TAATAAGCACGCTGTATCCGTT	263	278	370	1256	662	703	335	598	728
	DNAJC2	TTTAGCTTCTTGCTCCTTCCGT	293	282	336	514	357	880	55	916	885
	ARID1B	TCTATTGCACAGAACTTTGGGT	313	322	276	462	424	428	291	696	423
	RC3H1	TAAACTTTGAGCTCCATCCCTG	330	242	339	707	404	572	303	411	459
	TRIM66	TAATCTGGTAATAATGCCGGGC	259	286	367	826	732	784	609	39	617
	TIPARP	TTCTTTGCAAAATAACTGCCTT	195	399	319	282	783	572	670	969	595
	RCOR2	TTCGTCTGCTTCATGCTCTGTA	212	450	251	938	392	366	275	497	516
	GTF2H1	TTCTTTTCAAAGCACATGCCAT	256	381	276	475	637	272	450	419	463
	UBA7	TTGAGCTCAACCATTCCCTCAA	219	308	387	389	716	646	354	1055	112
	USP13	TTAGACACCATGTCTCTCGGTC	249	366	299	696	306	175	424	687	273
	RAI1	TTACATGCGAACTTCTTGAGGC	263	326	325	266	557	447	265	265	341
	PRDM9	TTCTGCTCTTCATCATCCCGGG	273	333	308	769	777	384	622	369	796
	ACTR6	TCGAACTTCTGAGTAAACCCGA	303	315	296	569	424	440	249	916	427
	POLR1B	TTGTCTGAGACCATATGGCGTA	263	319	333	407	913	921	1164	601	524
	UHRF1	TTCACAACCTTGTAGATGCCAT	263	359	293	558	497	366	338	428	495
	WRN	TTCAGAAACACCATCAATCCTT	242	395	279	303	341	366	622	194	104
	DDX49	TTGATCTCACACTCTCTTCGCA	273	315	328	423	338	213	322	164	40
	MLL4	TTGAATAGCTGCACTTTGGCTC	279	304	333	519	923	406	800	185	481
	MGMT	TTCTTTCAGTGAGACCTGGGTG	286	308	322	826	1041	543	797	381	1169
	TCF19	TCAACTTTGAGCACACTACCTG	296	238	382	654	675	637	660	1136	463
	CENPW	TTGACTTCTAACCTCTGCTCTT	313	304	299	626	277	515	479	238	585
	RPS19BP1	TATTCCTGCTGGAACTTCTGGA	326	260	330	879	150	456	189	518	441
	H2BFM	TTTCTCTGTTGCCATATCGCAC	259	308	350	647	153	356	784	152	696
	TAF1L	TTGCTTTGCAGCTATCATGCTA	283	278	356	790	452	581	558	529	362
	TAF6L	TATGATGAAACGAAAGTGCGGG	320	267	330	436	751	294	552	36	574
	KDM2A	TTCATGTCTCTGCAGTAGTGGC	239	403	276	743	535	422	756	15	219
	CDCA7L	TTCCATGGGAACATCATCTCGG	299	337	282	574	223	400	284	723	301
	HDAC7	TTAGAAGAGAACCAGGTCCCAA	316	275	328	185	398	1046	249	452	294
	NNMT	TAGACCACAAATGTTCTGGCTG	380	231	308	707	411	281	166	15	212
	SRCAP	TTTGAGTTGATGATGGAGCCAA	273	311	336	352	366	469	1457	149	262
	ZBTB40	TTCTACTTGAGGCTTCTCTGGT	256	355	310	839	188	125	316	645	470
	SMARCD1	TTATCAACAGGGACACTGTGGG	296	337	288	892	360	328	351	690	602
	MTF1	TTTTGTTTCCGGACATTCCGAC	249	300	373	686	926	350	918	815	538
	RUNX1	TTTGATGGCTCTGTGGTAGGTG	252	340	330	217	544	138	428	6	94
	TSPYL2	TATGGTTTGAGAACCAGCTGAA	259	256	407	433	474	1015	1097	170	692
	DHX33	TTAATGGATTTGATCGTCGGGT	286	289	347	621	296	328	236	229	391
	AFF4	TATAGCAAAAGCACACACCGAA	293	304	325	420	312	547	479	18	359
	MARCH5	TTGCACAGTTTGATCTTTGCAT	306	308	308	316	322	60	906	298	8
	HIST1H2AA	TTGAGTTCCTCATCATTGCGGA	316	264	342	352	719	699	740	357	273
	TRIM66	TATGTCTAAACCTCTCTCCCTT	336	264	322	686	271	269	501	348	133
	NAA60	TAGAGGACATAGGTGAAGCCAT	380	271	271	285	703	300	733	449	491
	MBD3	TTGTGCTTTGACTCTGACAGGG	259	348	316	271	424	512	220	717	534
	ARID1A	TGATACATTGTAGTCTGCTGGC	263	264	396	209	315	1	189	687	54
	WIZ	TATTCTCTACACAAAACGCGTT	263	293	367	391	271	422	835	645	545
	CSTL1	TATATACTCCACTCCCGTCGTC	256	286	382	579	271	228	64	48	137
	UBE2Q2	TCTATCTGAAGCTTGCACTGAC	336	260	328	925	780	322	667	684	549
	USP21	TAGGATTCACAGCTTCGCAGGA	350	264	310	576	420	568	523	821	36
	HIST1H2BI	TCTTAGAAGAGCCTTTGGGTCG	252	300	373	782	322	746	153	1118	194
	PHF12	TTCTGCTCTCGTTTCTTTCGGC	256	344	325	415	627	506	437	18	269
	NSD1	TTCCTCAACAGTCTCCTTGGGG	269	351	305	94	436	313	536	146	516
	DDX53	TTGACGTACAGTATCTGGCCAA	276	319	330	264	385	509	896	529	266
	KAT6B	TTACAGACAACAATCGTTGCTT	242	337	347	204	309	213	36	693	226
	ZHX2	TTGATTTGGAAGATCTGCCGTC	252	344	330	509	767	618	377	217	319
	TET2	TTGTTTCTCATCAACTGCTGGC	259	351	316	853	144	306	227	717	430
	BAZ2B	TCTTGTGACATCACTGTTGGGA	320	304	302	576	522	300	466	428	846
	METTL20	TATTCTACCACTTTGTGCAGGT	330	286	310	503	557	612	112	500	348
	H1FNT	TACCTATAGAGTCTCCAGGGTT	357	264	305	501	455	709	523	96	671
	NOC2L	TTGACATTGGACAGCTTCAGGA	236	315	376	459	532	784	338	6	344
	LNX1	TTTACAGTTATACAAGCACCGT	263	348	316	498	529	328	874	627	241
	C20orf20	TTAATGTTCGCAGTCACACGAA	266	260	401	631	408	135	291	289	8091
	STK4	TTAACCAAGACTGACACAGGTC	279	315	333	555	265	1158	632	247	559
	RUVBL2	TCACAGTGTCAGAACTCTGGTG	303	278	347	63	395	768	322	345	416
	SMARCD3	TTGAGCTGGTTTATGGACTCAA	202	337	390	514	249	749	281	577	140
	SIRT6	TGAGGACTTTTCCAGAAGCCTG	252	224	453	357	923	1514	791	229	900
	WDR5	TATCAGCAGATGAACTTGCCAG	259	340	330	370	885	643	386	1272	663
	TADA2B	TCAACCTCCTTGAAGAACGGAG	299	271	359	727	738	425	507	393	162
	TRERF1	TCAAGTACAAACAGCAACCCTG	333	260	336	769	296	593	644	182	860
	LBR	TTACACATCAACAGCAACAGGA	343	278	308	462	309	110	405	1	115
	HOXC11	TGAAGAAAAACTCTCGCTCCAG	195	308	427	1322	598	369	475	125	724
	CENPB	TTCTTCAGGATCGTGCTCAGCG	263	311	356	449	347	197	313	1055	262
	MCRS1	TTCAGCTTGATGACACCTTGTT	266	373	291	803	325	487	220	1685	739
	CDK17	TTTAGCAGCAATGATTCCGCAA	289	308	333	605	541	706	447	247	226
	METTL7A	TTTACAGACTCACAGATTGCTT	279	319	333	352	382	210	173	217	344
	CENPN	TTTCTCTGAAGCTGACTGTCAC	286	326	319	727	465	612	625	90	420
	GLI3	TTCTGTGACAACATTATGCCTT	293	373	265	730	459	384	383	119	201
	NAA60	TATTGCTGTGTTGTTGGTGGTG	336	256	339	647	179	765	1380	229	348
	GPS2	TAATCTGATGGTCACTTGTGGT	353	242	336	251	967	974	545	24	473
	TRRAP	TAAACATTCTGCTCCACTGGGG	266	333	333	227	576	896	125	381	255
	HINFP	TGGAACAGTGAGAACACTGGAA	259	275	399	381	280	472	74	934	434
	CBX7	TATCATCTTTACCTCCGCTGGG	273	304	356	300	618	266	673	318	172
	DNAJC1	TTGGTTGTCACATCTGTCACAG	347	227	359	1595	439	974	118	443	828
	DDX41	TTCACTGACATCAATGCTCGGC	273	351	310	178	191	191	99	776	258
	DDB1	TACTGAAAGACCACAATGCGAC	279	293	362	248	608	618	392	993	481
	C14orf169	TTCCAGATGATACACACGGGAG	222	414	299	876	1212	522	1068	42	473
	DNMT1	TTTGATGTCAGTCTCATTGGGC	239	351	345	1173	331	194	246	277	362
	DDX60	TTGGTAAACAGATCGAACCCAC	286	304	345	634	500	584	405	27	545
	HMGN4	TAACACAGCTGATTTTAGGGTT	336	271	328	219	468	665	249	2945	613
	HR	TGAGATACACAAAGGAAGCGGG	202	278	456	165	271	512	593	1	377
	SETDB2	TTCTGGAGGTCTAACATCTGGA	283	337	316	587	252	256	182	232	230
	ERCC6	TTTGGGTGTCTGAACATCTGAT	326	322	288	423	465	852	596	491	409
	ACTR5	TATTCCATAGGCAACCTTGGGA	340	297	299	462	700	506	389	809	602
	GATAD2A	TAGATGAACTCGTTGTTGGCGG	350	267	319	1350	1368	269	1967	1676	921
	DPF3	TTCTTGTTCATGTTGGAGCCCC	239	348	350	154	665	347	756	173	101
	PHF8	TTTGCTATCTTGGTTCGCCGAG	266	278	393	462	694	425	338	372	760
	CHMP2A	TTCATATCCATGATCTCTGCCT	269	392	276	331	287	35	106	185	337
	YBX2	TTGGAATCACTCCAGGATGGTG	310	348	279	430	869	447	319	467	183
	DHX58	TTCTGGATCACTTCTTGCTGGT	222	414	302	826	748	309	628	208	305
	SETD4	TCTTGATTCAGAACTTCCGCAG	289	330	319	1017	681	852	612	211	653
	CDY2A	TTGCATTGTATGAGGCAAGCTC	313	326	299	532	700	275	332	286	749
	HIST1H2AK	TGAGTAATGAACTGCTCCAGCC	202	304	433	553	280	250	357	330	251
	STRA13	TGTGAGAACAAATTTATAGCCT	323	249	367	308	481	291	99	518	878
	UBE3A	TTGCACAGAAAACTCTTTGGGG	330	370	239	912	255	597	303	223	244
	ELP3	TTGGATTCCAACTTCTCTGGTT	286	315	339	115	369	375	32	289	402
	POLR1B	TACAGTTTGTTATCCGATCGGT	289	286	365	167	605	628	322	645	180
	SHPRH	TTGTCACAAATACTCATCGGTT	293	322	325	644	427	194	988	458	1086
	ZFP57	TCTAGCTTTATCCACTCCTGGC	293	337	310	761	624	762	1148	904	534
	IGHMBP2	TAAAACCGCTTCTTTCTGGGAG	303	304	333	899	462	525	99	241	112
	CDY2A	TGCATCTGAGTCTTGTTCTGTA	343	238	359	402	131	213	418	571	169
	HIST1H2AE	TAGTAATCATTTCACTTGCCCT	414	238	288	988	719	584	622	512	262
	PRMT7	TTTGTTAATAATTCCGGCCGTT	259	326	356	295	430	996	1259	81	509
	TRIM13	TTGAGTTTGTTGATCTCTGGGT	310	264	367	58	274	400	109	327	258
	MIER1	TAAAGCTCAACAAACTTGTGTT	306	271	365	199	516	724	424	874	395
	ASXL3	TTTTCCTATCTACACCTCGGTT	306	289	347	574	589	322	99	200	488
	ZMYM3	TCTCAGTGGAATCTACAACCTC	347	304	291	279	373	288	303	699	362
	HIST1H3B	TTTGGGCATAATAGTCACTCGC	276	362	305	357	516	593	48	312	86
	CENPQ	TCTCTGACAACACAACTTCCTC	289	315	339	615	306	172	138	301	258
	TSPYL2	TTCTCGTTGTTGTCATCTGCAC	286	308	350	146	729	600	291	244	230
	DDX3Y	TTGTATCATACCTCTGTGCCAA	293	278	373	488	379	556	730	1248	291
	CHAF1A	TTACACAGGAATTGAGTCGGTT	299	275	370	162	277	235	361	1076	448
	MECP2	TAATCGGGAAGCTTTGTCAGAG	303	322	319	965	780	612	428	443	316
	PADI1	TAAAACAGTGACAGTAGTTGGC	326	256	362	279	195	288	163	660	262
	ADAR	TAGCTGACTGTTATCGAGGGAC	343	282	319	14	605	587	179	366	255
	NTMT1	TGTTGTAACACTTTAAGGGCCC	252	340	353	269	656	478	867	286	269
	UNG	TTTTATGTCACACATCTGGGTC	256	330	359	751	649	297	654	1195	585
	SAP130	TTGAATATGTCGAGCATGCGAT	306	286	353	498	681	344	281	217	362
	SIRT3	TCCACTTCCAACAACACTTGAA	360	297	288	459	866	406	1039	648	538
	MUM1	TTAAGAGACACTGTGAAACCTT	266	330	350	589	379	181	1253	702	298
	JARID2	TTGTTCTCCAAACTTCACCCTC	323	304	319	279	125	693	316	1	438
	SOX10	TCTTTCTTGTGCTGCATACGGA	340	304	302	107	630	934	354	452	577
	HIST1H2BA	TGCTGTCTGAATCTCTCTGGAA	212	319	416	819	551	915	638	1302	1036
	PPIB	TGTCGTGATGAAGAACTGGGAG	229	311	407	287	490	821	421	321	291
	SETD3	TTACTCGACTCTTCTTACCCAT	239	326	382	582	376	481	335	657	939
	RPP25L	TTGGTAACCACACTCATTGGGG	256	366	325	886	703	802	230	1052	312
	HIST1H1B	TAGTTGCCTTCTTCTTAGCCGG	320	297	330	975	633	515	163	253	370
	POP7	TATGGCAATAGTTACAGACCGC	363	242	342	324	1063	416	552	776	1097
	ARID4A	TTTCAGTCAACTACACTTCCTT	333	282	333	423	646	562	370	749	470
	TOX4	TATTCTGTTACAACCAGGTGGC	350	231	367	816	331	646	389	217	298
	SMYD2	TAGTCTTACAGTCTCCGAGGGA	289	271	390	1024	745	213	1240	503	638
	FOXO4	TTGAAGTAGGGTACAGTACGGA	293	355	302	665	703	416	526	520	595
	ERI1	TACACTGTTGAGTTTCCTCGGG	303	311	336	555	331	609	625	654	284
	ASH1L	TAACTGTCAATCACCATCCCAC	353	275	322	245	191	671	90	30	72
	CENPB	TTCCAGGAAATGCAGAGTAGGG	242	370	339	157	239	506	399	1032	585
	HR	TGGACATTCAAACTGCTCCGAG	259	293	399	777	519	487	596	194	542
	DNMT1	TTCCTTGATGGACTCATCCGAT	269	366	316	790	433	278	1208	12	624
	RECQL4	TTCTGCTTCATGTTGAGCCGTA	276	384	291	957	815	693	797	963	939
	HIST1H4K	TTGTTGATAGAAAGGGACGCTC	293	293	365	631	494	394	941	119	158
	PHF10	TTTTAAAGGAGGTCACACCCAA	299	322	330	485	780	150	603	146	241
	ARID1A	TTGTTGACCTGAGTCAATCCAC	326	286	339	154	217	409	488	357	473
	SMARCB1	TTCTCTGACATGTCCCACTCAA	226	450	276	462	503	409	20	636	542
	SSRP1	TTCTTCTCCTGAGTCATCGCTG	249	370	333	264	691	372	271	9	624
	GTF3C4	TAAAAAGTTACAGAGTCCGCGG	256	326	370	605	640	787	1138	589	645
	JMJD4	TTCCATCCTAGACAAGTGCCAG	266	370	316	649	433	962	737	586	323
	ZMYND8	TTACTGTTCAGTAAGCCAGGTT	289	304	359	425	150	175	99	6	266
	HSPBAP1	TTGTCCACAAAGTCTTTCCCAT	296	289	367	925	538	403	434	9	194
	SMARCC2	TTGGCTGAAATCTTCTTTCGGC	310	326	316	321	109	459	160	601	316
	SMNDC1	TTTATCAGCAATTCCACAGGTT	330	300	322	279	608	512	322	256	370
[truncated: 4,492 more rows]

## Sheet: Supplementary Table S9
	Category	Signaling Pathway	Type	ID	Description	p-value	Associated gene IDs	Genes with Peak in Geneset	Total Gene in Genset
	Cell cycle Proliferation		Gene Ontology Biological Process	GO:0071850	mitotic cell cycle arrest	0.0104018	1026	1	15
	Cell cycle Proliferation		Gene Ontology Biological Process	GO:0001935	endothelial cell proliferation	3.69012e-05	1232, 1893, 3952, 5291	4	112
	Cell cycle Proliferation		Gene Ontology Biological Process	GO:0050673	epithelial cell proliferation	7.04484e-05	1232, 1893, 2246, 3952, 5291, 26160, 80173	7	342
	Cell cycle Proliferation		Gene Ontology Biological Process	GO:0071158	positive regulation of cell cycle arrest	7.30183e-05	1026, 7027, 8091	3	85
	Cell cycle Proliferation		Gene Ontology Biological Process	GO:0050678	regulation of epithelial cell proliferation	0.000193129	1232, 1893, 2246, 3952, 26160, 80173	6	288
	Cell cycle Proliferation		Gene Ontology Biological Process	GO:2000134	negative regulation of G1/S transition of mitotic cell cycle	0.000216706	1026, 7027, 79027	3	94
	Cell cycle Proliferation		Gene Ontology Biological Process	GO:1902807	negative regulation of cell cycle G1/S phase transition	0.000247652	1026, 7027, 79027	3	97
	Cell cycle Proliferation		Gene Ontology Biological Process	GO:0071156	regulation of cell cycle arrest	0.000318168	1026, 7027, 8091	3	107
	Cell cycle Proliferation		Gene Ontology Biological Process	GO:0008285	negative regulation of cell proliferation	0.000380468	1026, 4601, 4881, 4914, 5745, 6693, 7027, 26160, 80173	9	636
	Cell cycle Proliferation		Gene Ontology Biological Process	GO:0042127	regulation of cell proliferation	0.00053552	1026, 1232, 1893, 2246, 3952, 4601, 4881, 4914, 5745, 6693, 7027, 8091, 26160, 58155, 80173	15	1511
	Cell cycle Proliferation		Gene Ontology Biological Process	GO:1901991	negative regulation of mitotic cell cycle phase transition	0.000572391	1026, 7027, 8091, 79027	4	198
	Cell cycle Proliferation		Gene Ontology Biological Process	GO:0001936	regulation of endothelial cell proliferation	0.000730497	1232, 1893, 3952	3	96
	Cell cycle Proliferation		Gene Ontology Biological Process	GO:1901988	negative regulation of cell cycle phase transition	0.000735707	1026, 7027, 8091, 79027	4	206
	Cell cycle Proliferation		Gene Ontology Biological Process	GO:0072413	signal transduction involved in mitotic cell cycle checkpoint	0.00152678	1026, 7027	2	63
	Cell cycle Proliferation		Gene Ontology Biological Process	GO:0072395	signal transduction involved in cell cycle checkpoint	0.00208721	1026, 7027	2	66
	Cell cycle Proliferation		Gene Ontology Biological Process	GO:0007093	mitotic cell cycle checkpoint	0.00267488	1026, 7027, 8091	3	151
	Cell cycle Proliferation		Gene Ontology Biological Process	GO:2000045	regulation of G1/S transition of mitotic cell cycle	0.00271717	1026, 7027, 79027	3	138
	Cell cycle Proliferation		Gene Ontology Biological Process	GO:0008283	cell proliferation	0.00331442	1026, 1232, 1893, 2246, 3952, 4601, 4881, 4914, 5291, 5745, 6693, 7027, 8091, 26160, 58155, 80173	16	1919
	Cell cycle Proliferation		Gene Ontology Biological Process	GO:1902806	regulation of cell cycle G1/S phase transition	0.00424852	1026, 7027, 79027	3	150
	Cell cycle Proliferation		Gene Ontology Biological Process	GO:0010948	negative regulation of cell cycle process	0.0044922	1026, 7027, 8091, 79027	4	267
	Cell cycle Proliferation		Gene Ontology Biological Process	GO:0045930	negative regulation of mitotic cell cycle	0.00683179	1026, 7027, 8091, 79027	4	272
	Cell cycle Proliferation		Gene Ontology Biological Process	GO:0001938	positive regulation of endothelial cell proliferation	0.00809705	1232, 1893	2	69
	Cell cycle Proliferation		Gene Ontology Biological Process	GO:1901990	regulation of mitotic cell cycle phase transition	0.014472	1026, 7027, 8091, 79027	4	313
	Cell cycle Proliferation		Gene Ontology Biological Process	GO:0050679	positive regulation of epithelial cell proliferation	0.0146066	1232, 1893, 2246	3	160
	Cell cycle Proliferation		Gene Ontology Biological Process	GO:0008284	positive regulation of cell proliferation	0.0164631	1026, 1232, 1893, 2246, 3952, 5745, 6693, 8091	8	827
	Cell cycle Proliferation		Gene Ontology Biological Process	GO:0000075	cell cycle checkpoint	0.0211348	1026, 7027, 8091	3	221
	Cell cycle Proliferation		Gene Ontology Biological Process	GO:1901987	regulation of cell cycle phase transition	0.0215274	1026, 7027, 8091, 79027	4	334
	Cell cycle Proliferation		Gene Ontology Biological Process	GO:0044772	mitotic cell cycle phase transition	0.0332959	1026, 7027, 8091, 11178, 79027	5	508
	Cell cycle Proliferation		Gene Ontology Biological Process	GO:0044770	cell cycle phase transition	0.0455333	1026, 7027, 8091, 11178, 79027	5	537
	Cell cycle Proliferation		Gene Ontology Biological Process	GO:0000082	G1/S transition of mitotic cell cycle	0.0458835	1026, 7027, 79027	3	239
	Cell cycle Proliferation		Gene Ontology Biological Process	GO:0007050	cell cycle arrest	0.0463562	1026, 7027, 8091	3	244
	Cell cycle Proliferation		Gene Ontology Biological Process	GO:0090068	positive regulation of cell cycle process	0.048941	1026, 7027, 8091	3	249
	Cell cycle Proliferation		KEGG Pathways	hsa04110	Cell cycle	0.00739559	1026, 1870, 7027	3	123
	Cell cycle Proliferation		Reactome	R-HSA-6804114	TP53 Regulates Transcription of Genes Involved in G2 Cell Cycle Arrest	0.00630072	7027	1	19
	Cell cycle Proliferation		Reactome	R-HSA-6791312	TP53 Regulates Transcription of Cell Cycle Genes	0.00069539	1026, 7027	2	49
	DNA damage DNA repair		Gene Ontology Biological Process	GO:0006978	DNA damage response, signal transduction by p53 class mediator resulting in transcription of p21 class mediator	0.00492826	1026	1	17
	DNA damage DNA repair		Gene Ontology Biological Process	GO:0042772	DNA damage response, signal transduction resulting in transcription	0.00543895	1026	1	18
	DNA damage DNA repair		Gene Ontology Biological Process	GO:0042771	intrinsic apoptotic signaling pathway in response to DNA damage by p53 class mediator	0.0420692	1026	1	43
	DNA damage DNA repair		Gene Ontology Biological Process	GO:2000780	negative regulation of double-strand break repair	0.00605534	8091	1	15
	DNA damage DNA repair		Gene Ontology Biological Process	GO:0007095	mitotic G2 DNA damage checkpoint	0.00736482	8091	1	16
	DNA damage DNA repair		Gene Ontology Biological Process	GO:0045738	negative regulation of DNA repair	0.00766861	8091	1	17
	DNA damage DNA repair		Gene Ontology Biological Process	GO:0042769	DNA damage response, detection of DNA damage	0.0389186	8091	1	36
	DNA damage DNA repair		Gene Ontology Biological Process	GO:0031572	G2 DNA damage checkpoint	0.0489449	8091	1	36
	DNA damage DNA repair		Gene Ontology Biological Process	GO:0044773	mitotic DNA damage checkpoint	0.000169134	1026, 7027, 8091	3	98
	DNA damage DNA repair		Gene Ontology Biological Process	GO:0006977	DNA damage response, signal transduction by p53 class mediator resulting in cell cycle arrest	0.00130587	1026, 7027	2	61
	DNA damage DNA repair		Gene Ontology Biological Process	GO:0072431	signal transduction involved in mitotic G1 DNA damage checkpoint	0.00144363	1026, 7027	2	62
	DNA damage DNA repair		Gene Ontology Biological Process	GO:1902400	intracellular signal transduction involved in G1 DNA damage checkpoint	0.00144363	1026, 7027	2	62
	DNA damage DNA repair		Gene Ontology Biological Process	GO:1902402	signal transduction involved in mitotic DNA damage checkpoint	0.00152678	1026, 7027	2	63
	DNA damage DNA repair		Gene Ontology Biological Process	GO:0072422	signal transduction involved in DNA damage checkpoint	0.0017111	1026, 7027	2	65
	DNA damage DNA repair		Gene Ontology Biological Process	GO:0000077	DNA damage checkpoint	0.00276941	1026, 7027, 8091	3	151
	DNA damage DNA repair		Gene Ontology Biological Process	GO:0031571	mitotic G1 DNA damage checkpoint	0.00289423	1026, 7027	2	70
	DNA damage DNA repair		Gene Ontology Biological Process	GO:0044783	G1 DNA damage checkpoint	0.00296716	1026, 7027	2	71
	DNA damage DNA repair		Gene Ontology Biological Process	GO:0030330	DNA damage response, signal transduction by p53 class mediator	0.023739	1026, 7027	2	107
	DNA damage DNA repair		Gene Ontology Biological Process	GO:0042770	signal transduction in response to DNA damage	0.0339148	1026, 7027	2	121
	DNA damage DNA repair		Reactome	R-HSA-2559586	DNA Damage/Telomere Stress Induced Senescence	0.00100482	1026, 8091	2	75
	DNA damage DNA repair		Reactome	R-HSA-69563	p53-Dependent G1 DNA Damage Response	0.00151068	1026, 64326	2	65
	DNA damage DNA repair		Reactome	R-HSA-69580	p53-Dependent G1/S DNA damage checkpoint	0.00151068	1026, 64326	2	65
	DNA damage DNA repair		Reactome	R-HSA-69615	G1/S DNA Damage Checkpoints	0.00174531	1026, 64326	2	67
	immune response		Gene Ontology Biological Process	GO:0002922	positive regulation of humoral immune response	0.00241097	1236	1	15
	immune response		Gene Ontology Biological Process	GO:0002828	regulation of type 2 immune response	0.0314562	1893	1	27
	immune response		Gene Ontology Biological Process	GO:0042092	type 2 immune response	0.049233	1893	1	34
	immune response		Gene Ontology Biological Process	GO:0002455	humoral immune response mediated by circulating immunoglobulin	0.049765	4153	1	41
	immune response		Gene Ontology Biological Process	GO:0002823	negative regulation of adaptive immune response based on somatic recombination of immune receptors built from immunoglobulin superfamily domains	0.0444079	6693	1	35
	immune response		Gene Ontology Biological Process	GO:0006955	immune response	0.0265058	1236, 1729, 1893, 3952, 4153, 4734, 5291, 5534, 6693, 6727, 23250, 55718	12	1835
	immune response		Gene Ontology Biological Process	GO:0002252	immune effector process	0.0310341	1729, 3952, 4153, 5291, 6693, 6727, 23250, 55718	8	1073
	immune response		Gene Ontology Biological Process	GO:0050776	regulation of immune response	0.0315622	1236, 1893, 3952, 4153, 5291, 5534, 6693	7	866
	immune response		Reactome	R-HSA-168249	Innate Immune System	0.0133333	109, 1026, 1729, 2246, 4153, 5291, 5534, 6727, 23250, 55718	10	1251
	Polarity Adhesion Migration		Gene Ontology Biological Process	GO:0033630	positive regulation of cell adhesion mediated by integrin	0.00952644	80173	1	17
	Polarity Adhesion Migration		Gene Ontology Biological Process	GO:0007157	heterophilic cell-cell adhesion via plasma membrane cell adhesion molecules	0.00333239	22859, 199731	2	45
	Polarity Adhesion Migration		Gene Ontology Biological Process	GO:0098609	cell-cell adhesion	0.00423904	29119, 1236, 3952, 5291, 6693, 9379, 10611, 22859, 199731	9	777
	Polarity Adhesion Migration		Gene Ontology Biological Process	GO:0034109	homotypic cell-cell adhesion	0.00757095	29119, 5291	2	73
	Polarity Adhesion Migration		Gene Ontology Biological Process	GO:0007155	cell adhesion	0.0131653	29119, 1232, 1236, 3952, 5291, 6693, 9379, 10611, 22859, 80173, 158326, 199731	12	1330
	Polarity Adhesion Migration		Gene Ontology Biological Process	GO:0022610	biological adhesion	0.0136484	29119, 1232, 1236, 3952, 5291, 6693, 9379, 10611, 22859, 80173, 158326, 199731	12	1337
	Polarity Adhesion Migration		Gene Ontology Biological Process	GO:0016337	single organismal cell-cell adhesion	0.0359099	29119, 1236, 3952, 5291, 6693, 9379	6	584
	Polarity Adhesion Migration		Gene Ontology Biological Process	GO:0007160	cell-matrix adhesion	0.0359691	1236, 5291, 158326	3	195
	Polarity Adhesion Migration		Gene Ontology Molecular Function	GO:0098641	cadherin binding involved in cell-cell adhesion	0.0170318	10611	1	18
	Polarity Adhesion Migration		Gene Ontology Molecular Function	GO:0050839	cell adhesion molecule binding	3.75288e-07	29119, 800, 1937, 2246, 9379, 10611, 10801, 22859, 64787, 199731	10	451
	Polarity Adhesion Migration		Gene Ontology Molecular Function	GO:0098632	protein binding involved in cell-cell adhesion	0.000293947	29119, 10611	2	31
	Polarity Adhesion Migration		Gene Ontology Molecular Function	GO:0098631	protein binding involved in cell adhesion	0.000675547	29119, 10611	2	38
	Polarity Adhesion Migration		KEGG Pathways	hsa04514	Cell adhesion molecules (CAMs)	0.0180474	6383, 6693, 9379	3	131
	Polarity Adhesion Migration		Reactome	R-HSA-416572	Sema4D induced cell migration and growth-cone collapse	0.022359	103910	1	24
	Signaling	JAK/STAT	Gene Ontology Biological Process	GO:0042517	positive regulation of tyrosine phosphorylation of Stat3 protein	0.0474007	3952	1	36
	Signaling	MAPK	Gene Ontology Biological Process	GO:0070374	positive regulation of ERK1 and ERK2 cascade	0.0196566	1236, 2246, 4914	3	181
	Signaling	PI3K/Akt	Gene Ontology Biological Process	GO:0043552	positive regulation of phosphatidylinositol 3-kinase activity	0.0457685	1236	1	30
	Signaling	PI3K/Akt	Gene Ontology Biological Process	GO:0032148	activation of protein kinase B activity	0.0450241	2246	1	26
	Signaling	PI3K/Akt	Gene Ontology Biological Process	GO:0010919	regulation of inositol phosphate biosynthetic process	0.00916849	5745	1	15
	Signaling	PI3K/Akt	Gene Ontology Biological Process	GO:0032958	inositol phosphate biosynthetic process	0.0215262	5745	1	21
	Signaling	PI3K/Akt	Gene Ontology Biological Process	GO:0048015	phosphatidylinositol-mediated signaling	0.000242754	2246, 3952, 4734, 4914, 5291	5	205
	Signaling	PI3K/Akt	Gene Ontology Biological Process	GO:0048017	inositol lipid-mediated signaling	0.000270759	2246, 3952, 4734, 4914, 5291	5	208
	Signaling	PI3K/Akt	Gene Ontology Biological Process	GO:0014066	regulation of phosphatidylinositol 3-kinase signaling	0.000442658	2246, 3952, 4734, 5291	4	145
	Signaling	PI3K/Akt	Gene Ontology Biological Process	GO:0014065	phosphatidylinositol 3-kinase signaling	0.00110271	2246, 3952, 4734, 5291	4	163
	Signaling	PI3K/Akt	Gene Ontology Biological Process	GO:0036092	phosphatidylinositol-3-phosphate biosynthetic process	0.0033561	2246, 5291	2	50
	Signaling	PI3K/Akt	Gene Ontology Biological Process	GO:0014068	positive regulation of phosphatidylinositol 3-kinase signaling	0.00934566	3952, 4734	2	65
	Signaling	PI3K/Akt	Gene Ontology Biological Process	GO:0051897	positive regulation of protein kinase B signaling	0.0150038	1236, 3952	2	83
	Signaling	PI3K/Akt	Gene Ontology Biological Process	GO:0046854	phosphatidylinositol phosphorylation	0.0367316	2246, 5291	2	99
	Signaling	VEGF	Gene Ontology Biological Process	GO:0030947	regulation of vascular endothelial growth factor receptor signaling pathway	0.0365069	4734	1	26
	Signaling	VEGF	Gene Ontology Biological Process	GO:0048010	vascular endothelial growth factor receptor signaling pathway	0.0280836	4734, 5291	2	92
	Signaling		Gene Ontology Biological Process	GO:0035584	calcium-mediated signaling using intracellular calcium source	0.00819645	22859	1	18
	Signaling		Gene Ontology Biological Process	GO:0050857	positive regulation of antigen receptor-mediated signaling pathway	0.0145276	1236	1	19
	Signaling		Gene Ontology Biological Process	GO:0045880	positive regulation of smoothened signaling pathway	0.0448147	26160	1	27
	Signaling		Gene Ontology Biological Process	GO:0035357	peroxisome proliferator activated receptor signaling pathway	0.0128438	3952	1	20
	Signaling		Gene Ontology Biological Process	GO:0032008	positive regulation of TOR signaling	0.0253516	3952	1	31
	Signaling		Gene Ontology Biological Process	GO:0042921	glucocorticoid receptor signaling pathway	0.00742152	4734	1	15
	Signaling		Gene Ontology Biological Process	GO:0031958	corticosteroid receptor signaling pathway	0.010175	4734	1	17
	Signaling		Gene Ontology Biological Process	GO:0048011	neurotrophin TRK receptor signaling pathway	0.0408505	4914	1	26
	Signaling		Gene Ontology Biological Process	GO:0033173	calcineurin-NFAT signaling cascade	0.0344116	5534	1	24
	Signaling		Gene Ontology Biological Process	GO:0097720	calcineurin-mediated signaling	0.0363406	5534	1	25
	Signaling		Gene Ontology Biological Process	GO:1900739	regulation of protein insertion into mitochondrial membrane involved in apoptotic signaling pathway	8.97274e-05	5534, 7027	2	29
	Signaling		Gene Ontology Biological Process	GO:1900740	positive regulation of protein insertion into mitochondrial membrane involved in apoptotic signaling pathway	8.97274e-05	5534, 7027	2	29
	Signaling		Gene Ontology Biological Process	GO:0001844	protein insertion into mitochondrial membrane involved in apoptotic signaling pathway	0.000109238	5534, 7027	2	31
	Signaling		Gene Ontology Biological Process	GO:1901030	positive regulation of mitochondrial outer membrane permeabilization involved in apoptotic signaling pathway	0.000222416	5534, 7027	2	37
	Signaling		Gene Ontology Biological Process	GO:1901028	regulation of mitochondrial outer membrane permeabilization involved in apoptotic signaling pathway	0.00046785	5534, 7027	2	45
	Signaling		Gene Ontology Biological Process	GO:0070098	chemokine-mediated signaling pathway	0.005928	1232, 1236	2	80
	Signaling		Gene Ontology Biological Process	GO:0072332	intrinsic apoptotic signaling pathway by p53 class mediator	0.00985047	1026, 1870	2	81
	Signaling		Gene Ontology Biological Process	GO:0007189	adenylate cyclase-activating G-protein coupled receptor signaling pathway	0.0123313	109, 5745	2	65
	Signaling		Gene Ontology Biological Process	GO:0007188	adenylate cyclase-modulating G-protein coupled receptor signaling pathway	0.0169119	109, 1232, 5745	3	152
	Signaling		Gene Ontology Biological Process	GO:0007169	transmembrane receptor protein tyrosine kinase signaling pathway	0.0254431	627, 2246, 3952, 4734, 4914, 5291, 6383	7	680
	Signaling		Gene Ontology Biological Process	GO:0048013	ephrin receptor signaling pathway	0.0313369	4914, 6383	2	87
	Signaling		Gene Ontology Biological Process	GO:0007187	G-protein coupled receptor signaling pathway, coupled to cyclic nucleotide second messenger	0.033303	109, 1232, 5745	3	179
	Signaling		Gene Ontology Biological Process	GO:0038095	Fc-epsilon receptor signaling pathway	0.0394434	5291, 5534	2	123
	Signaling	PI3K/Akt	Gene Ontology Molecular Function	GO:0016307	phosphatidylinositol phosphate kinase activity	0.00880911	5291	1	17
	Signaling	PI3K/Akt	Gene Ontology Molecular Function	GO:0016303	1-phosphatidylinositol-3-kinase activity	0.00209481	2246, 5291	2	43
	Signaling	PI3K/Akt	Gene Ontology Molecular Function	GO:0052742	phosphatidylinositol kinase activity	0.00356909	2246, 5291	2	51
	Signaling	PI3K/Akt	Gene Ontology Molecular Function	GO:0046934	phosphatidylinositol-4,5-bisphosphate 3-kinase activity	0.0133976	2246, 5291	2	66
	Signaling	PI3K/Akt	Gene Ontology Molecular Function	GO:0052813	phosphatidylinositol bisphosphate kinase activity	0.0151644	2246, 5291	2	69
	Signaling	PI3K/Akt	Gene Ontology Molecular Function	GO:0035004	phosphatidylinositol 3-kinase activity	0.0203709	2246, 5291	2	74
	Signaling	VEGF	KEGG Pathways	hsa04370	VEGF signaling pathway	0.0203514	5291, 5534	2	75
	Signaling		KEGG Pathways	hsa04062	Chemokine signaling pathway	0.00485777	109, 1232, 1236, 5291	4	188
	Signaling		KEGG Pathways	hsa04020	Calcium signaling pathway	0.0130623	109, 5260, 5534, 6870	4	176
	Signaling		KEGG Pathways	hsa04722	Neurotrophin signaling pathway	0.0145171	627, 4914, 5291	3	126
	Signaling		KEGG Pathways	hsa04115	p53 signaling pathway	0.0212419	1026, 64326	2	68
	Signaling	FGF	Reactome	R-HSA-8851708	Signaling by FGFR2 IIIa TM	0.00354653	2246	1	19
	Signaling	FGF	Reactome	R-HSA-5654228	Phospholipase C-mediated cascade; FGFR4	0.0082832	2246	1	15
	Signaling	FGF	Reactome	R-HSA-5654219	Phospholipase C-mediated cascade: FGFR1	0.00982493	2246	1	16
	Signaling	FGF	Reactome	R-HSA-190242	FGFR1 ligand binding and activation	0.0101508	2246	1	16
	Signaling	FGF	Reactome	R-HSA-5654704	SHC-mediated cascade:FGFR3	0.0117863	2246	1	18
	Signaling	FGF	Reactome	R-HSA-5654719	SHC-mediated cascade:FGFR4	0.0146806	2246	1	20
	Signaling	FGF	Reactome	R-HSA-2033519	Activated point mutants of FGFR2	0.0157288	2246	1	17
	Signaling	FGF	Reactome	R-HSA-5654706	FRS-mediated FGFR3 signaling	0.0159074	2246	1	20
	Signaling	FGF	Reactome	R-HSA-5654710	PI-3K cascade:FGFR3	0.0166469	2246	1	18
	Signaling	FGF	Reactome	R-HSA-5654688	SHC-mediated cascade:FGFR1	0.0167657	2246	1	21
	Signaling	FGF	Reactome	R-HSA-5654221	Phospholipase C-mediated cascade; FGFR2	0.0179171	2246	1	18
	Signaling	FGF	Reactome	R-HSA-5654712	FRS-mediated FGFR4 signaling	0.0192782	2246	1	22
	Signaling	FGF	Reactome	R-HSA-5654720	PI-3K cascade:FGFR4	0.0200669	2246	1	20
	Signaling	FGF	Reactome	R-HSA-5654693	FRS-mediated FGFR1 signaling	0.0216665	2246	1	23
	Signaling	FGF	Reactome	R-HSA-190241	FGFR2 ligand binding and activation	0.0218465	2246	1	20
	Signaling	FGF	Reactome	R-HSA-5654689	PI-3K cascade:FGFR1	0.0224928	2246	1	21
	Signaling	FGF	Reactome	R-HSA-5655332	Signaling by FGFR3 in disease	0.0253342	2246	1	22
	Signaling	FGF	Reactome	R-HSA-8853338	Signaling by FGFR3 point mutants in cancer	0.0253342	2246	1	22
	Signaling	FGF	Reactome	R-HSA-5654699	SHC-mediated cascade:FGFR2	0.0270152	2246	1	23
	Signaling	FGF	Reactome	R-HSA-5654708	Downstream signaling of activated FGFR3	0.0301159	2246	1	25
	Signaling	FGF	Reactome	R-HSA-5654700	FRS-mediated FGFR2 signaling	0.0331043	2246	1	25
	Signaling	FGF	Reactome	R-HSA-5654695	PI-3K cascade:FGFR2	0.0340989	2246	1	23
	Signaling	FGF	Reactome	R-HSA-1839126	FGFR2 mutant receptor activation	0.0343582	2246	1	33
	Signaling	FGF	Reactome	R-HSA-5654716	Downstream signaling of activated FGFR4	0.0346693	2246	1	27
	Signaling	FGF	Reactome	R-HSA-5654732	Negative regulation of FGFR3 signaling	0.0408913	2246	1	29
	Signaling	FGF	Reactome	R-HSA-5654733	Negative regulation of FGFR4 signaling	0.0461002	2246	1	31
	Signaling	PI3K/Akt	Reactome	R-HSA-5674400	Constitutive Signaling by AKT1 E17K in Cancer	0.018149	1026	1	25
	Signaling	PI3K/Akt	Reactome	R-HSA-198203	PI3K/AKT activation	0.000133123	1026, 2246, 4914, 5291	4	128
	Signaling	PI3K/Akt	Reactome	R-HSA-2219528	PI3K/AKT Signaling in Cancer	0.000764298	1026, 2246, 5291	3	90
	Signaling	PI3K/Akt	Reactome	R-HSA-1257604	PIP3 activates AKT signaling	0.00410708	1026, 2246, 5291	3	125
	Signaling	PI3K/Akt	Reactome	R-HSA-2219530	Constitutive Signaling by Aberrant PI3K in Cancer	0.0113144	2246, 5291	2	65
	Signaling	PI3K/Akt	Reactome	R-HSA-109704	PI3K Cascade	0.011675	2246, 5291	2	79
	Signaling	PI3K/Akt	Reactome	R-HSA-6811558	PI5P, PP2A and IER3 Regulate PI3K/AKT Signaling	0.0268703	2246, 5291	2	87
	Signaling	PI3K/Akt	Reactome	R-HSA-199418	Negative regulation of the PI3K/AKT network	0.0355795	2246, 5291	2	94
	Signaling		Reactome	R-HSA-164378	PKA activation in glucagon signalling	0.0146339	109	1	17
	Signaling		Reactome	R-HSA-163359	Glucagon signaling in metabolic regulation	0.0494356	109	1	33
	Signaling		Reactome	R-HSA-2028269	Signaling by Hippo	0.0221828	51421	1	21
	Signaling		Reactome	R-HSA-400685	Sema4D in semaphorin signaling	0.0296997	103910	1	27
	Signaling		Reactome	R-HSA-210993	Tie2 Signaling	0.0146204	5291	1	18
	Signaling		Reactome	R-HSA-912631	Regulation of signaling by CBL	0.021431	5291	1	22
	Signaling		Reactome	R-HSA-167021	PLC-gamma1 signalling	0.000667581	109, 4914	2	35
	Signaling		Reactome	R-HSA-187037	NGF signalling via TRKA from the plasma membrane	0.0123766	109, 1026, 2246, 4914, 5291	5	385
	Signaling		Reactome	R-HSA-111885	Opioid Signalling	0.0184688	109, 5534	2	83
	Signaling		Reactome	R-HSA-2682334	EPH-Ephrin signaling	0.0317354	6383, 103910	2	94
	Signaling		Reactome	R-HSA-166520	Signalling by NGF	0.0427575	109, 1026, 2246, 4914, 5291	5	475
	Signaling		Reactome	R-HSA-418594	G alpha (i) signalling events	0.0467349	109, 1232, 1236	3	241
	Signaling		Reactome	R-HSA-2424491	DAP12 signaling	0.04896	109, 1026, 2246, 5291	4	353
